# Supplementary material for: Preliminary Results on the Effects of Soybean Isoflavones on Growth Performance and Ruminal Microbiota in Fattening Goats
Source: MDPI journal article supplement (doi:10.3390/ani14081188), 2024-04-15

# Effects of soybean isoflavones on growth performance and ruminal microbiota in fattening goats

Yuexin Shao<sup>1†</sup>, Junhong Xu<sup>2†</sup>, Mengyu Wang<sup>1</sup>, Yalun Ren<sup>1</sup>, Manhong Wei<sup>3</sup>, Bowen Tian<sup>1</sup>, Jun Luo<sup>1</sup>, Juan J. Llor<sup>3\*</sup>, Huaiping Shi<sup>1\*</sup>,

<sup>1</sup>College of Animal Science and Technology, Northwest A&F University, Yangling, Shaanxi, 712100, China; shaoyuexin0423@163.com (YS); wmy914624@163.com(MW); yalunren2024@163.com(YR); tianbowen310@163.com (BT)  
<sup>2</sup>Weinan Agricultural Products Quality and Safety Inspection and Testing Center, Weinan Shaanxi, 714000, China; xujunhong000@soho.com(JX);  
<sup>3</sup>College of Animal Engineering, Yangling Vocational & Technical College, Yangling, 712100, China; nwsuafwmh@163.com(MW);  
<sup>4</sup>Department of Animal Sciences and Division of Nutritional Sciences, University of Illinois, Urbana, Illinois 61801, United States of America;  
\*Correspondence: huaipingshi@nwafu.edu.cn(HS) Tel.: +86-029- 87092102; jllor@illinois.edu(Juan J.Llor)  
† Equally contributing authors.

## Supplemental tables

**Supplemental Table S1** Composition and nutrient content of the basal diet (air-dry basis) %

| Items                         | Content |
|-------------------------------|---------|
| Corn                          | 16.50   |
| Soybean meal                  | 7.50    |
| Wheat bran                    | 3.60    |
| Rapeseed meal                 | 0.90    |
| CaHPO <sub>4</sub>            | 0.45    |
| NaCl                          | 0.45    |
| Premix <sup>1)</sup>          | 0.60    |
| Alfalfa hay                   | 21.00   |
| Corn silage                   | 49.00   |
| Total                         | 100.00  |
| Nutrient levels <sup>2)</sup> |         |
| ME (MJ/kg) <sup>3)</sup>      | 10.94   |
| OM                            | 93.34   |
| CP                            | 16.67   |
| EE                            | 3.13    |
| NDF                           | 22.86   |
| ADF                           | 7.54    |

- 1) The premix included the following per kg of diets: Vitamin A 170 KIU, Vitamin D3 3.40 KIU, Mn (as manganese sulfate) 350 mg, Zn (as zinc sulfate) 586 mg, Cu (as copper sulfate) 256 mg, Fe (as ferrous sulfate) 765 mg.
- 2) CP, EE, OM, NDF and ADF were measured values.
- 3) ME was calculated according to NRC (2007) [44].

**Supplemental Table S2 Certificate of analysis of isoflavones extract power<sup>1</sup>**

| ANALYSIS                               | SPECIFICATION            | RESULTS  |
|----------------------------------------|--------------------------|----------|
| Appearance                             | Light yellow fine powder | Complies |
| Odor                                   | Characteristic           | Complies |
| Assay(Isoflavones, HPLC <sup>2</sup> ) | ≥80.0%                   | 82.08%   |
| Daidzin                                |                          | 45.20%   |
| Glycitin                               |                          | 26.26%   |
| Genistin                               |                          | 8.21%    |
| Daidzein                               |                          | 1.60%    |
| Glycitein                              |                          | 0.51%    |
| Genistein                              |                          | 0.30%    |
| Sieve Analysis                         | 100% pass 80 mesh        | Complies |
| Loss on Drying                         | ≤5.0%                    | 1.87%    |
| Ash                                    | ≤5.0%                    | 1.93%    |
| GMO                                    | None                     | Complies |
| Heavy Metal                            | <10ppm                   | Complies |
| As                                     | <1ppm                    | Complies |
| Cd                                     | <0.5ppm                  | Complies |
| Hg                                     | <0.1ppm                  | Complies |
| <b>Microbiology</b>                    |                          |          |
| Total Plate Count                      | <1000cfu/g               | 870cfu/g |
| Yeast & Mold                           | <100cfu/g                | 55cfu/g  |
| E.Coli                                 | Negative                 | Complies |
| Salmonella                             | Negative                 | Complies |

<sup>1</sup>The gradient elution program of HPLC used to detect the soybean isoflavones

<sup>2</sup>HPLC=high performance liquid chromatography. Chromatographic conditions:

Chromatographic experiments were performed with a C18 column (150 mm × 4.6 mm, 5 μm)

(Shimadzu, Kyoto, Japan). Mobile phase A was water, mobile phase B was acetonitrile, the

flow rate was 1.0 mL/min, the column temperature was 40°C, the injection volume was 10 μL

and the detection wavelength was 260 nm.

## Supplemental Figures

**Supplemental Figure S1** Body measurements. 1head length, 2withers height, 3rump height, 4body length, 5chest girth, 6chest depth, 7cannon bone circumference, 8abdominal girth

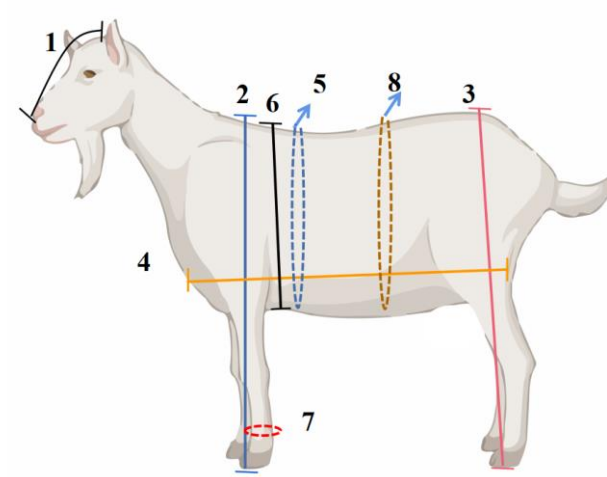

Supplement: s1 [file s1]
