# Supplementary material for: Preliminary Results on the Effects of Soybean Isoflavones on Growth Performance and Ruminal Microbiota in Fattening Goats
Source: Animals (Basel). 2024 Apr 15;14(8):1188. doi: 10.3390/ani14081188 (PMC11047704; doi:10.3390/ani14081188)
Supplement: Supplementary file 1 [file animals-14-01188-s001.zip › Supplementary Material 2.xlsx]

## Sheet:  Title page"Supplemental materi
Supplemental material Journal: Animals Title: Effects of soybean isoflavones on growth performance and ruminal microbiota in fattening goats Yuexin Shao1†, Junhong Xu2†,Mengyu Wang1, Yalun Ren1, Manhong Wei3, Bowen Tian1, Jun Luo1, Juan J. Loor4*, and Huaiping Shi1* Equally contributing authors: Yuexin Shao and Junhong Xu Corresponding author: huaipingshi@nwafu.edu.cn, jloor@illinois.edu

## Sheet: Supplemental Table S3
Supplemental Table S3 Comparisons of bacterial structures of different samples based on OTU compositions
#OTU_num	Control1	Control2	Control3	SIF1-1	SIF1-2	SIF1-3	SIF2-1	SIF2-2	SIF2-3	Taxonomy
OTU_1	10287	398	11283	910	13202	4444	10404	23187	14360	k__Bacteria;p__Proteobacteria;c__Gammaproteobacteria;o__Aeromonadales;f__Succinivibrionaceae;g__Succinivibrio;s__
OTU_2	579	796	132	1211	6947	464	10721	4651	3262	k__Bacteria;p__Bacteroidota;c__Bacteroidia;o__Bacteroidales;f__F082
OTU_3	88	78	208	9803	135	134	377	359	11649	k__Bacteria;p__Bacteroidota;c__Bacteroidia;o__Bacteroidales;f__Prevotellaceae;g__Prevotella;s__
OTU_4	193	179	675	2415	217	3059	5494	325	120	k__Bacteria;p__Firmicutes;c__Clostridia;o__Lachnospirales;f__Lachnospiraceae;g__Lachnospiraceae_XPB1014_group;s__
OTU_5	2947	778	116	880	90	4393	49	442	609	k__Bacteria;p__Spirochaetota;c__Spirochaetia;o__Spirochaetales;f__Spirochaetaceae;g__Treponema;s__
OTU_6	4148	5219	1033	56	24	64	33	42	36	k__Bacteria;p__Bacteroidota;c__Bacteroidia;o__Bacteroidales;f__Prevotellaceae;g__Prevotella
OTU_7	2425	1354	117	671	3200	512	4876	1518	11390	k__Bacteria;p__Bacteroidota;c__Bacteroidia;o__Bacteroidales;f__F082;g__unidentified_F082;s__Bacteroidales_bacterium_Bact_22
OTU_8	36	26	66	2837	42	36	16	126	3041	k__Bacteria;p__Bacteroidota;c__Bacteroidia;o__Bacteroidales;f__Prevotellaceae;g__Prevotella;s__
OTU_9	5443	319	670	45	20	34	22	29	17	k__Bacteria;p__Bacteroidota;c__Bacteroidia;o__Bacteroidales;f__Prevotellaceae;g__Prevotella
OTU_10	485	918	28	681	2892	32	1150	795	203	k__Bacteria;p__Bacteroidota;c__Bacteroidia;o__Bacteroidales;f__Rikenellaceae;g__Rikenellaceae_RC9_gut_group;s__
OTU_11	46	29	71	53	2932	86	403	40	63	k__Bacteria;p__Proteobacteria;c__Gammaproteobacteria;o__Aeromonadales;f__Succinivibrionaceae;g__Ruminobacter;s__
OTU_12	116	476	7393	65	17	59	33	28	35	k__Bacteria;p__Bacteroidota;c__Bacteroidia;o__Bacteroidales;f__Prevotellaceae;g__Prevotella;s__
OTU_13	349	193	138	2698	103	94	80	68	49	k__Bacteria;p__Firmicutes;c__Clostridia;o__Oscillospirales;f__Ruminococcaceae;g__Ruminococcus;s__
OTU_14	175	1953	765	575	315	129	741	236	446	k__Bacteria;p__Firmicutes;c__Clostridia;o__unidentified_Clostridia;f__Hungateiclostridiaceae;g__Saccharofermentans;s__
OTU_15	43	47	81	2653	249	59	31	45	20	k__Bacteria;p__Firmicutes;c__Clostridia;o__Lachnospirales;f__Lachnospiraceae;g__Lachnospiraceae_NK4A136_group
OTU_16	269	324	370	116	200	633	247	217	196	k__Bacteria;p__Firmicutes;c__Clostridia;o__Oscillospirales;f__Oscillospiraceae;g__UCG-002;s__
OTU_17	90	337	467	89	875	2565	487	911	82	k__Bacteria;p__Bacteroidota;c__Bacteroidia;o__Bacteroidales;f__Prevotellaceae;g__Prevotellaceae_UCG-001;s__
OTU_18	973	636	6836	827	471	241	266	569	165	k__Bacteria;p__Firmicutes;c__Clostridia;o__Christensenellales;f__Christensenellaceae;g__Christensenellaceae_R-7_group;s__
OTU_19	73	133	851	74	424	711	83	229	32	k__Bacteria;p__Firmicutes;c__Clostridia;o__Oscillospirales;f__Oscillospiraceae;g__UCG-002;s__
OTU_20	52	196	473	105	128	41	328	54	834	k__Bacteria;p__Firmicutes;c__Clostridia;o__Lachnospirales;f__Lachnospiraceae
OTU_21	585	465	184	588	367	396	669	353	164	k__Bacteria;p__Firmicutes;c__Clostridia;o__Peptostreptococcales-Tissierellales;f__Peptostreptococcaceae;g__Romboutsia;s__Romboutsia_ilealis
OTU_22	589	729	1794	646	319	271	565	133	402	k__Bacteria;p__Firmicutes;c__Clostridia;o__Lachnospirales;f__Lachnospiraceae;g__Butyrivibrio;s__Butyrivibrio_fibrisolvens
OTU_23	14	46	40	10	8	964	1439	6	37	k__Bacteria;p__Bacteroidota;c__Bacteroidia;o__Bacteroidales;f__Prevotellaceae;g__Prevotella;s__
OTU_24	39	340	46	110	23	18	680	53	46	k__Bacteria;p__Firmicutes;c__Clostridia;o__unidentified_Clostridia;f__Hungateiclostridiaceae;g__Saccharofermentans;s__
OTU_25	172	24	21	22	164	17	95	1068	244	k__Bacteria;p__Bacteroidota;c__Bacteroidia;o__Bacteroidales;f__F082;g__;s__
OTU_26	166	202	91	179	21	64	58	425	26	k__Bacteria;p__Firmicutes;c__Clostridia;o__Christensenellales;f__Christensenellaceae;g__Christensenellaceae_R-7_group
OTU_27	40	62	263	37	22	34	29	863	14	k__Bacteria;p__Firmicutes;c__Clostridia;o__Oscillospirales;f__Oscillospiraceae;g__UCG-005;s__
OTU_28	35	30	52	243	371	231	28	284	25	k__Bacteria;p__Bacteroidota;c__Bacteroidia;o__Bacteroidales;f__Bacteroidales_UCG-001;g__;s__
OTU_29	10	22	18	7	452	897	14	16	12	k__Bacteria;p__Spirochaetota;c__Spirochaetia;o__Spirochaetales;f__Spirochaetaceae;g__Sphaerochaeta;s__
OTU_30	48	72	611	62	27	49	69	79	76	k__Bacteria;p__Firmicutes;c__Clostridia;o__Lachnospirales;f__Lachnospiraceae;g__[Eubacterium]_ruminantium_group;s__
OTU_31	572	58	24	39	46	340	23	23	12	k__Bacteria;p__Firmicutes;c__Clostridia;o__Clostridiales;f__Clostridiaceae;g__Clostridium_sensu_stricto_1
OTU_32	302	400	911	310	220	466	498	221	56	k__Bacteria;p__Firmicutes;c__Clostridia;o__Oscillospirales;f__Oscillospiraceae;g__UCG-005;s__
OTU_33	50	383	367	62	61	118	18	272	14	k__Bacteria;p__Bacteroidota;c__Bacteroidia;o__Bacteroidales;f__F082;g__;s__
OTU_34	157	1242	133	79	6	23	10	5	2	k__Bacteria;p__Bacteroidota;c__Bacteroidia;o__Bacteroidales;f__Prevotellaceae;g__Prevotella;s__
OTU_35	20	0	5	220	22	30	857	12	4	k__Bacteria;p__Bacteroidota;c__Bacteroidia;o__Bacteroidales;f__Prevotellaceae;g__Prevotella;s__
OTU_36	55	29	135	41	109	231	214	218	125	k__Bacteria;p__Bacteroidota;c__Bacteroidia;o__Bacteroidales;f__Rikenellaceae;g__Rikenellaceae_RC9_gut_group;s__
OTU_37	20	167	518	173	12	19	378	713	315	k__Bacteria;p__Bacteroidota;c__Bacteroidia;o__Bacteroidales;f__Rikenellaceae;g__Rikenellaceae_RC9_gut_group;s__
OTU_38	511	611	554	476	153	226	219	372	241	k__Bacteria;p__Firmicutes;c__Clostridia;o__Oscillospirales;f__Oscillospiraceae;g__NK4A214_group;s__
OTU_39	9	6	7	48	13	16	2	15	914	k__Bacteria;p__Cyanobacteria;c__Vampirivibrionia;o__Gastranaerophilales;f__;g__;s__
OTU_40	85	154	444	151	80	87	109	56	54	k__Bacteria;p__Firmicutes;c__Clostridia;o__Lachnospirales;f__Lachnospiraceae;g__Pseudobutyrivibrio;s__
OTU_41	502	748	573	318	672	807	572	99	326	k__Bacteria;p__Firmicutes;c__Negativicutes;o__Acidaminococcales;f__Acidaminococcaceae;g__Succiniclasticum;s__
OTU_42	6	8	29	850	29	49	10	9	6	k__Bacteria;p__unidentified_Bacteria;c__Alphaproteobacteria;o__Rhodospirillales;f__;g__;s__
OTU_43	86	113	289	303	94	497	175	60	128	k__Bacteria
OTU_44	57	809	814	32	15	25	8	13	30	k__Bacteria;p__unidentified_Bacteria;c__Alphaproteobacteria;o__Rhodospirillales;f__;g__;s__
OTU_45	439	167	300	415	327	214	354	460	233	k__Bacteria;p__Firmicutes;c__Clostridia;o__Oscillospirales;f__Oscillospiraceae;g__UCG-005;s__
OTU_46	90	17	429	35	8	104	69	13	14	k__Bacteria;p__Firmicutes;c__Clostridia;o__Oscillospirales;f__Oscillospiraceae;g__Colidextribacter;s__Clostridiales_bacterium_NK3B98
OTU_47	49	464	36	303	83	223	22	58	15	k__Bacteria;p__Firmicutes;c__Clostridia;o__Oscillospirales;f__Ruminococcaceae;g__Ruminococcus;s__Ruminococcus_flavefaciens
OTU_48	4	2	1	2	42	24	955	7	4	k__Bacteria;p__Bacteroidota;c__Bacteroidia;o__Bacteroidales;f__Prevotellaceae;g__Prevotella;s__
OTU_49	38	712	27	32	33	29	21	69	23	k__Bacteria;p__Firmicutes;c__Clostridia;o__Oscillospirales;f__Ruminococcaceae;g__Ruminococcus;s__rumen_bacterium_R-21
OTU_50	227	207	232	154	92	111	165	61	75	k__Bacteria;p__Firmicutes;c__Clostridia;o__Oscillospirales;f__[Eubacterium]_coprostanoligenes_group;g__;s__
OTU_51	2	1	2	2	2	5	438	3	439	k__Bacteria;p__Bacteroidota;c__Bacteroidia;o__Bacteroidales;f__Prevotellaceae;g__Prevotella;s__
OTU_52	26	85	49	37	93	45	191	174	56	k__Bacteria;p__Campilobacterota;c__Campylobacteria;o__Campylobacterales;f__Campylobacteraceae;g__Campylobacter;s__Campylobacter_hyointestinalis
OTU_53	312	31	40	14	179	909	17	10	6	k__Bacteria;p__Bacteroidota;c__Bacteroidia;o__Bacteroidales;f__Prevotellaceae
OTU_54	63	106	359	80	436	223	32	158	130	k__Bacteria;p__Firmicutes;c__Clostridia;o__Oscillospirales;f__Ruminococcaceae;g__Ruminococcus
OTU_55	7	9	6	134	29	1154	7	10	26	k__Bacteria;p__Bacteroidota;c__Bacteroidia;o__Bacteroidales;f__Prevotellaceae;g__Prevotellaceae_UCG-001;s__
OTU_56	22	14	36	23	483	15	39	14	16	k__Bacteria;p__Firmicutes;c__Clostridia;o__Lachnospirales;f__Lachnospiraceae;g__Lachnospiraceae_NK3A20_group
OTU_57	40	402	34	100	51	112	18	47	38	k__Bacteria;p__Spirochaetota;c__Spirochaetia;o__Spirochaetales;f__Spirochaetaceae;g__Treponema;s__
OTU_58	25	65	37	372	428	805	403	149	221	k__Bacteria;p__Spirochaetota;c__Spirochaetia;o__Spirochaetales;f__Spirochaetaceae;g__Treponema;s__Treponema_bryantii
OTU_59	28	26	20	629	26	19	200	18	6	k__Bacteria;p__Firmicutes;c__Clostridia;o__Lachnospirales;f__Lachnospiraceae
OTU_60	4	0	6	2	1	14	4	6	682	k__Bacteria;p__Cyanobacteria;c__Vampirivibrionia;o__Gastranaerophilales;f__;g__;s__
OTU_61	188	130	53	318	21	4	5	1	26	k__Bacteria;p__Firmicutes;c__Clostridia;o__Lachnospirales;f__Lachnospiraceae;g__[Eubacterium]_ruminantium_group;s__
OTU_62	73	57	74	91	74	78	103	247	69	k__Bacteria;p__Firmicutes;c__Clostridia;o__Lachnospirales;f__Lachnospiraceae;g__[Eubacterium]_ruminantium_group;s__
OTU_63	60	71	286	120	327	73	259	56	75	k__Bacteria;p__Firmicutes;c__Bacilli;o__Lactobacillales;f__Lactobacillaceae;g__Lactobacillus;s__Lactobacillus_murinus
OTU_64	68	19	142	23	80	32	33	199	115	k__Bacteria;p__Bacteroidota;c__Bacteroidia;o__Bacteroidales;f__Prevotellaceae;g__Prevotellaceae_UCG-004;s__
OTU_65	20	17	47	13	17	459	4	10	8	k__Bacteria;p__Firmicutes;c__Clostridia;o__Clostridia_vadinBB60_group;f__;g__;s__
OTU_66	51	9	5	8	534	6	5	54	2	k__Bacteria;p__Bacteroidota;c__Bacteroidia;o__Bacteroidales;f__Prevotellaceae;g__Prevotella;s__
OTU_67	78	134	285	71	83	71	104	71	19	k__Bacteria;p__Firmicutes;c__Clostridia;o__Oscillospirales;f__Oscillospiraceae;g__Papillibacter;s__
OTU_68	81	119	83	110	88	35	67	26	52	k__Bacteria;p__Firmicutes;c__Clostridia;o__Oscillospirales;f__Oscillospiraceae;g__NK4A214_group;s__
OTU_69	61	108	41	82	123	38	166	71	22	k__Bacteria;p__Firmicutes;c__Bacilli;o__Lactobacillales;f__Lactobacillaceae;g__Lactobacillus;s__Lactobacillus_intestinalis
OTU_70	91	38	53	35	31	31	160	125	130	k__Bacteria;p__Firmicutes;c__Clostridia;o__Peptostreptococcales-Tissierellales;f__Anaerovoracaceae;g__[Eubacterium]_nodatum_group;s__
OTU_71	3	140	48	666	40	88	61	2	55	k__Bacteria;p__Bacteroidota;c__Bacteroidia;o__Bacteroidales;f__Prevotellaceae;g__Prevotellaceae_UCG-001;s__
OTU_72	98	42	55	225	213	13	53	3	66	k__Bacteria;p__Firmicutes;c__Clostridia;o__Oscillospirales;f__Ruminococcaceae;g__Ruminococcus
OTU_73	5	5	8	10	4	3	21	75	498	k__Bacteria;p__Firmicutes;c__Negativicutes;o__Veillonellales-Selenomonadales;f__Veillonellaceae;g__Megasphaera;s__Megasphaera_elsdenii
OTU_74	28	62	428	42	26	29	37	51	10	k__Bacteria;p__Firmicutes;c__Clostridia;o__Oscillospirales;f__Ruminococcaceae;g__Ruminococcus
OTU_75	5	26	13	29	125	157	246	53	70	k__Bacteria;p__Spirochaetota;c__Spirochaetia;o__Spirochaetales;f__Spirochaetaceae;g__Treponema
OTU_76	7	21	33	5	15	399	33	7	70	k__Bacteria;p__Bacteroidota;c__Bacteroidia;o__Bacteroidales;f__Prevotellaceae;g__Prevotellaceae_UCG-003;s__
OTU_77	61	17	77	333	10	5	10	7	5	k__Bacteria;p__Firmicutes;c__Clostridia;o__Lachnospirales;f__Lachnospiraceae;g__Lachnospiraceae_NK4A136_group
OTU_78	32	97	37	3	13	318	24	24	79	k__Bacteria;p__Bacteroidota;c__Bacteroidia;o__Bacteroidales;f__Rikenellaceae;g__U29-B03;s__
OTU_79	392	81	194	189	13	103	90	232	18	k__Bacteria;p__Bacteroidota;c__Bacteroidia;o__Bacteroidales;f__Rikenellaceae;g__Rikenellaceae_RC9_gut_group;s__
OTU_80	134	135	4	141	34	107	75	44	26	k__Bacteria;p__Firmicutes;c__Clostridia;o__Clostridiales;f__Clostridiaceae;g__Clostridium_sensu_stricto_1;s__
OTU_81	10	102	142	149	15	344	10	7	6	k__Bacteria;p__Bacteroidota;c__Bacteroidia;o__Bacteroidales;f__Rikenellaceae;g__Rikenellaceae_RC9_gut_group;s__
OTU_82	28	25	147	74	32	38	53	19	16	k__Bacteria;p__Bacteroidota;c__Bacteroidia;o__Bacteroidales;f__Prevotellaceae;g__Prevotella;s__
OTU_83	91	17	6	5	106	190	61	11	182	k__Bacteria;p__Bacteroidota;c__Bacteroidia;o__Bacteroidales;f__Prevotellaceae;g__Prevotella;s__
OTU_84	7	16	4	47	48	208	17	30	52	k__Bacteria;p__Verrucomicrobiota;c__Kiritimatiellae;o__WCHB1-41;f__;g__;s__
OTU_85	52	120	120	206	3	59	49	42	4	k__Bacteria;p__Bacteroidota;c__Bacteroidia;o__Bacteroidales;f__Prevotellaceae;g__Prevotellaceae_NK3B31_group;s__rumen_bacterium_NK3B31
OTU_86	24	64	38	270	63	21	52	20	13	k__Bacteria;p__Firmicutes;c__Clostridia;o__Oscillospirales;f__Ruminococcaceae;g__Ruminococcus;s__bacterium_V9D2012
OTU_87	139	163	1	119	80	109	98	126	13	k__Bacteria;p__Firmicutes;c__Bacilli;o__Erysipelotrichales;f__Erysipelotrichaceae;g__Turicibacter;s__
OTU_88	57	68	32	214	85	29	12	48	139	k__Bacteria;p__Firmicutes;c__Clostridia;o__Oscillospirales;f__[Eubacterium]_coprostanoligenes_group;g__;s__
OTU_89	100	13	20	53	388	20	33	3	28	k__Bacteria;p__unidentified_Bacteria;c__Alphaproteobacteria;o__Rhodospirillales;f__;g__;s__
OTU_90	36	3	7	270	16	24	11	367	10	k__Bacteria;p__Bacteroidota;c__Bacteroidia;o__Bacteroidales;f__Rikenellaceae;g__Rikenellaceae_RC9_gut_group;s__
OTU_91	84	28	5	172	3	45	71	235	43	k__Bacteria;p__Bacteroidota;c__Bacteroidia;o__Bacteroidales;f__Rikenellaceae;g__Rikenellaceae_RC9_gut_group;s__
OTU_92	19	15	21	297	40	1	10	12	15	k__Bacteria;p__Bacteroidota;c__Bacteroidia;o__Bacteroidales;f__Prevotellaceae;g__Prevotella;s__Prevotella_sp_BP1-56
OTU_93	15	124	87	15	10	11	10	14	61	k__Bacteria;p__Firmicutes;c__Clostridia;o__Oscillospirales;f__UCG-010;g__;s__
OTU_94	11	0	6	41	4	398	24	4	3	k__Bacteria;p__Bacteroidota;c__Bacteroidia;o__Bacteroidales;f__Prevotellaceae;g__Prevotella;s__
OTU_95	21	34	52	51	4	20	126	44	24	k__Bacteria;p__Bacteroidota;c__Bacteroidia;o__Bacteroidales;f__Rikenellaceae;g__Rikenellaceae_RC9_gut_group;s__
OTU_96	35	10	13	18	11	63	22	155	4	k__Bacteria;p__Firmicutes;c__Clostridia;o__Oscillospirales;f__Ruminococcaceae;g__Ruminococcus;s__Ruminococcaceae_bacterium_NK4B32
OTU_97	112	86	13	36	27	42	32	16	6	k__Bacteria;p__Firmicutes;c__Clostridia;o__Lachnospirales;f__Lachnospiraceae;g__probable_genus_10;s__
OTU_98	2	5	22	231	3	3	2	0	84	k__Bacteria;p__Bacteroidota;c__Bacteroidia;o__Bacteroidales;f__Prevotellaceae;g__Alloprevotella;s__Alloprevotella_sp
OTU_99	10	11	4	8	48	58	53	46	237	k__Bacteria;p__Firmicutes;c__Negativicutes;o__Veillonellales-Selenomonadales;f__Selenomonadaceae;g__Anaerovibrio;s__
OTU_100	51	37	120	107	27	36	93	2	56	k__Bacteria;p__unidentified_Bacteria;c__Clostridia;o__Oscillospirales;f__Ruminococcaceae;g__unidentified_Ruminococcaceae;s__Ruminococcus_sp_YE281
OTU_101	121	105	53	277	32	87	36	29	14	k__Bacteria;p__Firmicutes;c__Clostridia;o__Christensenellales;f__Christensenellaceae;g__Christensenellaceae_R-7_group;s__
OTU_102	35	53	24	30	42	159	93	24	20	k__Bacteria;p__Firmicutes;c__Clostridia;o__Clostridia_UCG-014;f__;g__;s__
OTU_103	22	125	33	214	21	89	15	25	6	k__Bacteria;p__Firmicutes;c__Clostridia;o__Clostridia_UCG-014;f__;g__;s__
OTU_104	3	1	11	37	172	9	61	21	25	k__Bacteria;p__Bacteroidota;c__Bacteroidia;o__Bacteroidales;f__Prevotellaceae;g__Prevotella;s__
OTU_105	17	81	22	53	16	58	27	20	11	k__Bacteria;p__Firmicutes;c__Clostridia;o__Oscillospirales;f__Oscillospiraceae;g__Oscillibacter;s__
OTU_106	5	8	5	43	30	65	5	26	86	k__Bacteria
OTU_107	7	80	13	25	8	88	26	81	14	k__Bacteria;p__Firmicutes;c__Clostridia;o__Clostridia_UCG-014;f__;g__;s__
OTU_108	59	6	35	757	35	163	43	59	280	k__Bacteria;p__Bacteroidota;c__Bacteroidia;o__Bacteroidales;f__Prevotellaceae;g__Prevotella;s__
OTU_109	19	88	28	83	42	243	28	88	167	k__Bacteria;p__Bacteroidota;c__Bacteroidia;o__Bacteroidales;f__F082;g__;s__
OTU_110	40	179	15	5	196	3	9	4	4	k__Bacteria;p__Firmicutes;c__Bacilli;o__Erysipelotrichales;f__Erysipelatoclostridiaceae;g__UCG-004;s__
OTU_111	101	235	116	184	23	389	177	25	82	k__Bacteria;p__Bacteroidota;c__Bacteroidia;o__Bacteroidales;f__Prevotellaceae;g__Prevotella;s__Prevotella_ruminicola
OTU_112	80	14	91	88	113	135	110	87	5	k__Bacteria;p__Firmicutes;c__Clostridia;o__Oscillospirales;f__Ruminococcaceae;g__Ruminococcus
OTU_113	5	2	2	199	21	5	3	5	12	k__Bacteria;p__Elusimicrobia;c__unidentified_Elusimicrobia;o__Elusimicrobiales;f__Elusimicrobiaceae;g__Elusimicrobium;s__
OTU_114	80	10	153	41	28	13	24	8	1	k__Bacteria;p__Firmicutes;c__Clostridia;o__Lachnospirales;f__Lachnospiraceae;g__Lachnospiraceae_NK4A136_group
OTU_115	17	130	11	36	9	11	5	93	57	k__Bacteria;p__Firmicutes;c__Clostridia;o__Clostridia_vadinBB60_group;f__;g__;s__
OTU_116	14	88	21	9	4	157	5	17	4	k__Bacteria;p__Firmicutes;c__Clostridia;o__Oscillospirales;f__UCG-010;g__;s__
OTU_117	16	13	23	140	44	99	10	163	11	k__Bacteria;p__Firmicutes;c__Clostridia;o__Oscillospirales;f__Ruminococcaceae;g__CAG-352;s__
OTU_118	8	41	46	35	2	51	16	13	44	k__Bacteria;p__unidentified_Bacteria;c__Clostridia;o__Oscillospirales;f__Ruminococcaceae;g__;s__
OTU_119	13	12	11	12	22	30	6	204	4	k__Bacteria;p__unidentified_Bacteria;c__Clostridia;o__Oscillospirales;f__Ruminococcaceae;g__;s__
OTU_120	12	5	4	16	34	148	20	13	5	k__Bacteria;p__unidentified_Bacteria;c__Alphaproteobacteria;o__Rhodospirillales;f__;g__;s__
OTU_121	51	32	192	16	23	22	10	79	10	k__Bacteria;p__Firmicutes;c__Negativicutes;o__Veillonellales-Selenomonadales;f__Selenomonadaceae;g__Anaerovibrio;s__
OTU_122	19	245	160	48	93	32	15	31	123	k__Bacteria;p__Firmicutes;c__Clostridia;o__Oscillospirales;f__Ruminococcaceae;g__Ruminococcus
OTU_123	28	105	50	109	61	20	47	67	17	k__Bacteria;p__Firmicutes;c__Clostridia;o__Oscillospirales;f__[Eubacterium]_coprostanoligenes_group;g__;s__
OTU_124	72	40	48	142	79	39	74	87	25	k__Bacteria;p__Firmicutes;c__Clostridia;o__Christensenellales;f__Christensenellaceae;g__Christensenellaceae_R-7_group;s__
OTU_125	0	62	10	53	12	135	2	4	3	k__Bacteria;p__unidentified_Bacteria;c__Alphaproteobacteria;o__Rhodospirillales;f__;g__;s__
OTU_126	9	31	47	15	5	17	19	46	21	k__Bacteria;p__Firmicutes;c__Clostridia;o__Oscillospirales;f__[Eubacterium]_coprostanoligenes_group;g__;s__
OTU_127	32	9	2	179	3	26	9	3	5	k__Bacteria;p__Cyanobacteria;c__Vampirivibrionia;o__Gastranaerophilales;f__;g__;s__
OTU_128	211	2	34	200	4	105	3	3	3	k__Bacteria;p__Bacteroidota;c__Bacteroidia;o__Bacteroidales;f__F082;g__;s__
OTU_129	28	32	34	45	102	27	91	49	17	k__Bacteria;p__Firmicutes;c__Bacilli;o__Lactobacillales;f__Lactobacillaceae;g__Lactobacillus;s__Lactobacillus_reuteri
OTU_130	21	124	84	51	10	46	78	86	17	k__Bacteria;p__Bacteroidota;c__Bacteroidia;o__Bacteroidales;f__Prevotellaceae;g__Prevotellaceae_UCG-004;s__
OTU_131	29	81	126	53	33	206	9	208	14	k__Bacteria;p__Firmicutes;c__Clostridia;o__Lachnospirales;f__Lachnospiraceae;g__Roseburia
OTU_132	19	8	5	37	2	17	14	445	175	k__Bacteria;p__Bacteroidota;c__Bacteroidia;o__Bacteroidales;f__Prevotellaceae;g__Prevotella;s__
OTU_133	51	80	27	79	2	8	1	2	0	k__Bacteria;p__Bacteroidota;c__Bacteroidia;o__Bacteroidales;f__F082;g__;s__
OTU_134	14	20	30	13	29	320	21	9	3	k__Bacteria;p__Firmicutes;c__Clostridia;o__Clostridia_UCG-014;f__;g__;s__
OTU_135	26	311	126	2	6	3	3	4	0	k__Bacteria;p__Bacteroidota;c__Bacteroidia;o__Bacteroidales;f__Prevotellaceae;g__Prevotellaceae_UCG-001;s__
OTU_136	167	31	122	27	21	22	31	20	11	k__Bacteria
OTU_137	18	6	48	18	6	20	25	66	6	k__Bacteria;p__Firmicutes;c__Clostridia;o__Christensenellales;f__Christensenellaceae;g__Christensenellaceae_R-7_group;s__
OTU_138	93	72	5	10	19	7	11	6	1	k__Bacteria;p__Firmicutes;c__Clostridia
OTU_139	66	41	5	14	2	168	1	8	0	k__Bacteria;p__Bacteroidota;c__Bacteroidia;o__Bacteroidales;f__Prevotellaceae;g__Prevotella;s__
OTU_140	12	26	45	15	41	7	97	59	35	k__Bacteria;p__Firmicutes;c__Bacilli;o__Lactobacillales;f__Lactobacillaceae;g__Lactobacillus;s__Lactobacillus_johnsonii
OTU_141	0	3	99	97	0	16	1	0	1	k__Bacteria;p__Bacteroidota;c__Bacteroidia;o__Bacteroidales;f__F082;g__;s__
OTU_142	568	5	28	7	4	4	3	3	1	k__Bacteria;p__Bacteroidota;c__Bacteroidia;o__Bacteroidales;f__Prevotellaceae;g__Prevotella;s__
OTU_143	28	156	8	3	2	7	3	4	6	k__Bacteria;p__Firmicutes;c__Clostridia;o__Monoglobales;f__Monoglobaceae;g__Monoglobus;s__
OTU_144	140	99	74	39	63	106	71	34	26	k__Bacteria;p__Desulfobacterota;c__Desulfovibrionia;o__Desulfovibrionales;f__Desulfovibrionaceae;g__Desulfovibrio
OTU_145	99	111	2	328	25	62	8	36	1	k__Bacteria;p__Bacteroidota;c__Bacteroidia;o__Bacteroidales;f__Rikenellaceae;g__Rikenellaceae_RC9_gut_group
OTU_146	0	0	2	58	4	30	51	11	31	k__Bacteria;p__Spirochaetota;c__Spirochaetia;o__Spirochaetales;f__Spirochaetaceae;g__Treponema;s__Treponema_parvum
OTU_147	3	3	3	4	4	249	3	5	18	k__Bacteria;p__Bacteroidota;c__Bacteroidia;o__Bacteroidales;f__Prevotellaceae;g__Prevotella;s__
OTU_148	8	179	5	9	3	2	50	2	1	k__Bacteria;p__Firmicutes;c__Clostridia;o__unidentified_Clostridia;f__Hungateiclostridiaceae;g__Saccharofermentans;s__
OTU_149	7	10	62	94	6	7	25	52	118	k__Bacteria;p__Firmicutes;c__Clostridia;o__Lachnospirales;f__Lachnospiraceae;g__Butyrivibrio;s__Butyrivibrio_fibrisolvens
OTU_150	17	1	9	4	1	44	1	0	121	k__Bacteria;p__Bacteroidota;c__Bacteroidia;o__Bacteroidales;f__Prevotellaceae
OTU_151	18	129	7	136	7	39	3	20	14	k__Bacteria;p__Firmicutes;c__Clostridia;o__Lachnospirales;f__Lachnospiraceae;g__Lachnospiraceae_NK4A136_group;s__
OTU_152	101	222	7	18	6	20	16	8	8	k__Bacteria;p__Firmicutes;c__Clostridia;o__Christensenellales;f__Christensenellaceae
OTU_153	243	57	1	27	9	51	1	4	0	k__Bacteria;p__Bacteroidota;c__Bacteroidia;o__Bacteroidales;f__Rikenellaceae;g__Rikenellaceae_RC9_gut_group;s__
OTU_154	94	59	32	17	6	5	5	31	6	k__Bacteria;p__Bacteroidota;c__Bacteroidia;o__Bacteroidales;f__Rikenellaceae;g__Rikenellaceae_RC9_gut_group;s__
OTU_155	18	1	54	1	2	18	5	10	60	k__Bacteria;p__Bacteroidota;c__Bacteroidia;o__Bacteroidales;f__Prevotellaceae
OTU_156	67	11	29	37	33	11	1	4	13	k__Bacteria;p__Firmicutes;c__Clostridia;o__Oscillospirales;f__Butyricicoccaceae;g__UCG-009;s__
OTU_157	17	45	16	122	145	220	18	9	43	k__Bacteria;p__Cyanobacteria;c__Vampirivibrionia;o__Gastranaerophilales;f__;g__;s__
OTU_158	8	11	28	13	27	13	6	37	3	k__Bacteria;p__Firmicutes;c__Clostridia;o__unidentified_Clostridia;f__Ethanoligenenaceae;g__;s__
OTU_159	51	68	4	3	12	0	16	23	5	k__Bacteria;p__Bacteroidota;c__Bacteroidia;o__Bacteroidales;f__Rikenellaceae;g__Rikenellaceae_RC9_gut_group;s__
OTU_160	25	20	49	57	33	39	46	41	24	k__Bacteria;p__Firmicutes;c__Clostridia;o__Clostridia_UCG-014;f__;g__;s__
OTU_161	47	67	21	7	9	48	4	1	4	k__Bacteria;p__Desulfobacterota;c__Desulfovibrionia;o__Desulfovibrionales;f__Desulfovibrionaceae;g__Desulfovibrio;s__
OTU_162	78	44	8	35	22	11	24	18	7	k__Bacteria;p__Firmicutes;c__Clostridia;o__Oscillospirales;f__Ruminococcaceae;g__Ruminococcus;s__Ruminococcus_albus
OTU_163	15	12	4	21	12	10	5	4	97	k__Bacteria;p__Bacteroidota;c__Bacteroidia;o__Bacteroidales;f__Bacteroidales_RF16_group;g__;s__
OTU_164	18	159	71	13	12	143	15	10	36	k__Bacteria;p__Firmicutes;c__Clostridia;o__Clostridia_UCG-014;f__;g__;s__
OTU_165	8	28	4	15	32	46	9	6	85	k__Bacteria;p__unidentified_Bacteria;c__Alphaproteobacteria;o__Rhodospirillales;f__;g__;s__
OTU_166	11	16	83	8	8	145	10	13	2	k__Bacteria;p__Firmicutes;c__Clostridia;o__Oscillospirales;f__Ruminococcaceae;g__UCG-001;s__
OTU_167	54	76	1	2	1	15	0	2	0	k__Bacteria;p__Bacteroidota;c__Bacteroidia;o__Bacteroidales;f__Rikenellaceae
OTU_168	30	46	33	41	34	18	82	20	9	k__Bacteria;p__unidentified_Bacteria;c__Clostridia;o__Lachnospirales;f__Lachnospiraceae;g__unidentified_Lachnospiraceae;s__Lachnospiraceae_bacterium_CG54
OTU_169	21	34	34	7	21	7	9	18	23	k__Bacteria;p__Firmicutes;c__Clostridia;o__Lachnospirales;f__Lachnospiraceae
OTU_170	63	72	37	73	7	18	34	37	9	k__Bacteria;p__Bacteroidota;c__Bacteroidia;o__Bacteroidales;f__Bacteroidaceae;g__Bacteroides;s__
OTU_171	48	10	6	9	49	62	3	2	20	k__Bacteria;p__unidentified_Bacteria;c__Alphaproteobacteria;o__Rhodospirillales;f__;g__;s__
OTU_172	15	8	51	20	25	13	104	7	4	k__Bacteria;p__Firmicutes;c__Clostridia;o__Oscillospirales;f__[Eubacterium]_coprostanoligenes_group;g__;s__
OTU_173	8	364	11	2	25	10	3	0	2	k__Bacteria;p__Bacteroidota;c__Bacteroidia;o__Bacteroidales;f__Prevotellaceae;g__Prevotella;s__
OTU_174	10	86	6	33	13	83	26	7	22	k__Bacteria;p__Firmicutes;c__Clostridia;o__Oscillospirales;f__[Eubacterium]_coprostanoligenes_group;g__;s__
OTU_175	101	598	150	464	22	18	136	46	252	k__Bacteria;p__Firmicutes;c__Clostridia;o__unidentified_Clostridia;f__Hungateiclostridiaceae;g__Saccharofermentans;s__
OTU_176	23	4	5	8	49	47	6	7	3	k__Bacteria;p__Firmicutes;c__Clostridia;o__Lachnospirales;f__Lachnospiraceae;g__Butyrivibrio;s__
OTU_177	15	20	88	27	10	97	10	10	7	k__Bacteria;p__Firmicutes;c__Clostridia;o__Oscillospirales;f__UCG-010;g__;s__
OTU_178	0	0	3	265	1	4	5	1	0	k__Bacteria;p__unidentified_Bacteria;c__Bacteroidia;o__Bacteroidales;f__Prevotellaceae;g__;s__
OTU_179	2	104	1	0	22	5	1	1	2	k__Bacteria;p__unidentified_Bacteria;c__Saccharimonadia;o__Saccharimonadales;f__Saccharimonadaceae;g__Candidatus_Saccharimonas;s__
OTU_180	3	1	2	5	0	64	1	63	2	k__Bacteria;p__Bacteroidota;c__Bacteroidia;o__Bacteroidales;f__Rikenellaceae;g__Rikenellaceae_RC9_gut_group;s__
OTU_181	3	21	3	5	2	93	2	1	4	k__Bacteria;p__unidentified_Bacteria;c__Alphaproteobacteria;o__Rhodospirillales;f__;g__;s__
OTU_182	7	20	9	24	13	37	36	15	3	k__Bacteria;p__Firmicutes;c__Clostridia;o__Clostridia_UCG-014;f__;g__;s__
OTU_183	4	6	2	7	5	2	88	146	62	k__Bacteria;p__Bacteroidota;c__Bacteroidia;o__Bacteroidales;f__Muribaculaceae;g__;s__
OTU_184	13	40	121	2	5	11	20	4	17	k__Bacteria;p__unidentified_Bacteria;c__Saccharimonadia;o__Saccharimonadales;f__Saccharimonadaceae;g__Candidatus_Saccharimonas;s__
OTU_185	36	6	22	1	4	10	4	1	28	k__Bacteria;p__Firmicutes;c__Clostridia;o__Monoglobales;f__Monoglobaceae;g__Monoglobus;s__
OTU_186	1	3	3	21	60	47	4	9	4	k__Bacteria;p__Firmicutes;c__Clostridia;o__Lachnospirales;f__Lachnospiraceae;g__Lachnospiraceae_NK3A20_group;s__
OTU_187	34	46	5	13	4	6	81	11	5	k__Bacteria;p__Firmicutes;c__Clostridia;o__Oscillospirales;f__[Eubacterium]_coprostanoligenes_group;g__;s__
OTU_188	7	18	52	11	1	4	16	11	3	k__Bacteria;p__Firmicutes;c__Clostridia;o__Clostridia_vadinBB60_group;f__;g__;s__
OTU_189	57	43	46	33	65	69	19	39	19	k__Bacteria;p__Firmicutes;c__Clostridia;o__Oscillospirales;f__Ruminococcaceae;g__Ruminococcus
OTU_190	46	27	7	19	2	7	4	0	19	k__Bacteria;p__Firmicutes;c__Clostridia;o__Clostridia_vadinBB60_group;f__;g__;s__
OTU_191	19	13	2	17	60	0	54	41	14	k__Bacteria;p__Bacteroidota;c__Bacteroidia;o__Bacteroidales;f__Rikenellaceae;g__Rikenellaceae_RC9_gut_group;s__
OTU_192	18	40	43	12	8	7	32	11	0	k__Bacteria;p__Firmicutes;c__Negativicutes;o__Acidaminococcales;f__Acidaminococcaceae;g__Succiniclasticum;s__
OTU_193	15	7	47	13	19	3	22	12	11	k__Bacteria;p__Bacteroidota;c__Bacteroidia;o__Bacteroidales;f__Rikenellaceae;g__Rikenellaceae_RC9_gut_group;s__
OTU_194	49	13	36	84	870	855	43	109	65	k__Bacteria;p__Proteobacteria;c__Gammaproteobacteria;o__Aeromonadales;f__Succinivibrionaceae;g__Succinivibrio
OTU_195	13	66	15	29	27	49	14	15	56	k__Bacteria;p__Firmicutes;c__Clostridia;o__Clostridia_vadinBB60_group;f__;g__;s__
OTU_196	8	15	15	6	50	8	0	0	12	k__Bacteria;p__Bacteroidota;c__Bacteroidia;o__Bacteroidales;f__Prevotellaceae;g__Alloprevotella;s__
OTU_197	7	27	35	8	1	9	8	4	2	k__Bacteria;p__Firmicutes;c__Clostridia;o__Lachnospirales;f__Lachnospiraceae
OTU_198	15	5	323	6	13	3	35	8	9	k__Bacteria;p__Firmicutes;c__Bacilli;o__RF39;f__;g__;s__
OTU_199	24	30	53	22	26	39	22	26	8	k__Bacteria;p__Firmicutes;c__Clostridia;o__Oscillospirales;f__UCG-010;g__;s__
OTU_200	14	13	19	11	13	26	14	12	20	k__Bacteria
OTU_201	13	29	34	52	14	36	13	13	117	k__Bacteria;p__Bacteroidota;c__Bacteroidia;o__Bacteroidales;f__Prevotellaceae;g__Prevotella;s__
OTU_202	4	83	7	3	5	44	5	6	3	k__Bacteria;p__Firmicutes;c__Clostridia;o__Oscillospirales;f__Oscillospiraceae;g__NK4A214_group;s__
OTU_203	17	3	62	26	24	8	11	2	35	k__Bacteria;p__Firmicutes;c__Clostridia;o__Clostridia_vadinBB60_group;f__;g__;s__
OTU_204	10	5	28	7	54	8	5	1	0	k__Bacteria;p__Firmicutes;c__Clostridia;o__Christensenellales;f__Christensenellaceae;g__Christensenellaceae_R-7_group;s__
OTU_205	1	1	1	0	1	136	1	136	2	k__Bacteria;p__Firmicutes;c__Clostridia;o__Oscillospirales;f__Ruminococcaceae;g__Faecalibacterium;s__Faecalibacterium_prausnitzii
OTU_206	3	14	10	5	0	67	16	0	4	k__Bacteria;p__Bacteroidota;c__Bacteroidia;o__Bacteroidales;f__Prevotellaceae;g__Prevotella
OTU_207	7	4	5	10	2	54	5	4	62	k__Bacteria;p__Cyanobacteria;c__Vampirivibrionia;o__Gastranaerophilales
OTU_208	10	16	59	8	3	6	20	12	27	k__Bacteria;p__Synergistota;c__Synergistia;o__Synergistales;f__Synergistaceae;g__Pyramidobacter;s__
OTU_209	5	27	4	4	96	6	1	1	0	k__Bacteria;p__Firmicutes;c__Clostridia;o__Clostridia_UCG-014;f__;g__;s__
OTU_210	152	9	23	17	4	3	4	4	7	k__Bacteria;p__Firmicutes;c__Clostridia;o__Christensenellales;f__Christensenellaceae;g__Christensenellaceae_R-7_group;s__
OTU_211	2	86	1	3	4	9	3	0	1	k__Bacteria;p__Firmicutes;c__Clostridia
OTU_212	41	59	32	37	20	36	12	66	18	k__Bacteria;p__Firmicutes;c__Clostridia;o__Lachnospirales;f__Lachnospiraceae;g__Lachnospiraceae_NK4A136_group;s__
OTU_213	30	23	6	6	2	8	63	26	5	k__Bacteria;p__Bacteroidota;c__Bacteroidia;o__Bacteroidales;f__Prevotellaceae;g__Prevotellaceae_UCG-003;s__
OTU_214	9	6	19	7	57	17	5	4	71	k__Bacteria;p__Bacteroidota;c__Bacteroidia;o__Bacteroidales;f__Bacteroidales_RF16_group;g__;s__
OTU_215	23	27	5	26	19	24	15	34	52	k__Bacteria;p__Cyanobacteria;c__Vampirivibrionia;o__Gastranaerophilales;f__;g__;s__
OTU_216	13	27	5	8	3	37	3	21	2	k__Bacteria;p__Firmicutes;c__Clostridia;o__Oscillospirales;f__[Eubacterium]_coprostanoligenes_group;g__;s__
OTU_217	8	8	1	12	2	2	4	163	1	k__Bacteria;p__Bacteroidota;c__Bacteroidia;o__Bacteroidales;f__Rikenellaceae;g__Rikenellaceae_RC9_gut_group;s__
OTU_218	0	40	5	4	4	15	14	4	1	k__Bacteria;p__Firmicutes;c__Clostridia;o__Oscillospirales;f__[Eubacterium]_coprostanoligenes_group;g__;s__
OTU_219	3	10	52	10	13	7	7	12	15	k__Bacteria;p__Bacteroidota;c__Bacteroidia;o__Bacteroidales;f__Prevotellaceae;g__Prevotellaceae_UCG-003;s__
OTU_220	24	37	1	10	0	18	35	7	0	k__Bacteria;p__Bacteroidota;c__Bacteroidia;o__Bacteroidales;f__Prevotellaceae;g__Prevotellaceae_Ga6A1_group;s__
OTU_221	61	97	5	2	0	3	1	0	3	k__Bacteria;p__Firmicutes;c__Clostridia;o__Christensenellales;f__Christensenellaceae;g__Christensenellaceae_R-7_group
OTU_222	1	4	35	13	4	12	17	25	1	k__Bacteria;p__Firmicutes;c__Clostridia;o__Lachnospirales;f__Lachnospiraceae;g__Lachnospiraceae_NK3A20_group;s__Lachnospiraceae_bacterium_NK4A144
OTU_223	21	0	7	26	1	3	29	1	0	k__Bacteria;p__Firmicutes;c__Clostridia;o__Clostridia_vadinBB60_group;f__;g__;s__
OTU_224	3	69	159	30	7	16	56	4	18	k__Bacteria;p__Bacteroidota;c__Bacteroidia;o__Bacteroidales;f__Prevotellaceae;g__Prevotellaceae_YAB2003_group;s__
OTU_225	20	29	30	6	4	9	3	6	3	k__Bacteria;p__Firmicutes;c__Clostridia;o__Lachnospirales;f__Lachnospiraceae;g__Tyzzerella;s__
OTU_226	3	49	21	4	5	46	17	2	8	k__Bacteria;p__Bacteroidota;c__Bacteroidia;o__Bacteroidales;f__Prevotellaceae;g__Prevotellaceae_UCG-003;s__
OTU_227	21	44	0	68	41	4	2	12	11	k__Bacteria;p__Firmicutes;c__Bacilli;o__Erysipelotrichales;f__Erysipelotrichaceae;g__Dubosiella;s__
OTU_228	15	16	8	33	0	2	3	44	3	k__Bacteria;p__Bacteroidota;c__Bacteroidia;o__Bacteroidales;f__Rikenellaceae;g__Rikenellaceae_RC9_gut_group;s__
OTU_229	1	0	2	62	0	25	1	8	69	k__Archaea;p__Thermoplasmatota;c__Thermoplasmata;o__Methanomassiliicoccales;f__Methanomethylophilaceae;g__Candidatus_Methanomethylophilus;s__methanogenic_archaeon_ISO4-H5
OTU_230	15	4	31	8	5	34	2	22	3	k__Bacteria;p__Firmicutes;c__Clostridia;o__Oscillospirales;f__UCG-010;g__;s__
OTU_231	143	43	64	55	16	24	8	25	11	k__Bacteria;p__Bacteroidota;c__Bacteroidia;o__Bacteroidales;f__Prevotellaceae;g__Alloprevotella;s__
OTU_232	7	3	7	10	45	15	13	37	32	k__Bacteria;p__Firmicutes;c__Clostridia;o__Oscillospirales;f__UCG-010;g__;s__
OTU_233	7	60	63	9	18	13	18	10	88	k__Bacteria;p__unidentified_Bacteria;c__Alphaproteobacteria;o__Rhodospirillales;f__;g__;s__
OTU_234	24	68	23	16	87	16	36	7	8	k__Bacteria;p__Firmicutes;c__Clostridia;o__Oscillospirales;f__Ruminococcaceae;g__Ruminococcus;s__Ruminococcus_sp_NK3A76
OTU_235	97	0	4	2	0	7	3	3	5	k__Bacteria;p__Cyanobacteria;c__Vampirivibrionia;o__Gastranaerophilales;f__;g__;s__
OTU_236	10	1	28	87	1	2	3	0	2	k__Bacteria;p__Firmicutes;c__Bacilli;o__RF39;f__;g__;s__
OTU_237	1	101	0	0	0	0	1	14	4	k__Bacteria;p__Bacteroidota;c__Bacteroidia;o__Bacteroidales;f__F082;g__;s__
OTU_238	60	2	1	57	2	0	0	1	0	k__Bacteria;p__Bacteroidota;c__Bacteroidia;o__Bacteroidales;f__Prevotellaceae
OTU_239	24	12	125	7	3	7	5	41	8	k__Bacteria;p__Bacteroidota;c__Bacteroidia;o__Bacteroidales;f__Prevotellaceae;g__Prevotellaceae_UCG-003;s__
OTU_240	0	16	23	2	19	1	23	6	14	k__Bacteria;p__Proteobacteria;c__Gammaproteobacteria;o__Aeromonadales;f__Succinivibrionaceae;g__Anaerobiospirillum
OTU_241	27	16	5	7	66	48	2	42	3	k__Bacteria;p__Bacteroidota;c__Bacteroidia;o__Bacteroidales;f__Muribaculaceae;g__;s__
OTU_242	17	23	169	5	12	5	68	43	18	k__Bacteria;p__Bacteroidota;c__Bacteroidia;o__Bacteroidales;f__Prevotellaceae;g__Prevotella;s__
OTU_243	69	98	25	129	12	3	2	35	5	k__Bacteria;p__Bacteroidota;c__Bacteroidia;o__Bacteroidales;f__Prevotellaceae;g__Alloprevotella;s__
OTU_244	1	0	21	2	0	1	1	60	0	k__Bacteria;p__Firmicutes;c__Clostridia;o__Clostridia_vadinBB60_group;f__;g__;s__
OTU_245	7	5	14	32	36	50	11	4	11	k__Bacteria;p__Firmicutes;c__Clostridia;o__Lachnospirales;f__Lachnospiraceae;g__Butyrivibrio;s__
OTU_246	6	13	7	4	3	10	146	3	2	k__Bacteria;p__Firmicutes;c__Bacilli;o__RF39;f__;g__;s__
OTU_247	0	3	2	38	1	4	18	12	43	k__Bacteria;p__Bacteroidota;c__Bacteroidia;o__Bacteroidales;f__Prevotellaceae;g__Prevotella;s__
OTU_248	1	47	4	1	31	27	9	0	1	k__Bacteria;p__unidentified_Bacteria;c__Saccharimonadia;o__Saccharimonadales;f__Saccharimonadaceae;g__Candidatus_Saccharimonas;s__
OTU_249	10	12	29	10	7	1	4	20	10	k__Bacteria;p__Firmicutes;c__Clostridia
OTU_250	74	22	16	30	8	4	2	11	15	k__Bacteria;p__Firmicutes;c__Clostridia;o__Oscillospirales;f__Oscillospiraceae
OTU_251	14	4	5	20	34	9	10	26	4	k__Bacteria;p__Firmicutes;c__Clostridia;o__Lachnospirales;f__Lachnospiraceae;g__Blautia
OTU_252	5	6	7	7	10	26	1	7	37	k__Bacteria;p__Cyanobacteria;c__Vampirivibrionia;o__Gastranaerophilales;f__;g__;s__
OTU_253	5	9	7	2	8	21	5	4	3	k__Bacteria;p__Firmicutes;c__Clostridia;o__Oscillospirales
OTU_254	10	10	28	14	28	5	7	70	7	k__Bacteria;p__Firmicutes;c__Clostridia;o__Oscillospirales;f__[Eubacterium]_coprostanoligenes_group
OTU_255	66	171	57	84	208	93	123	43	52	k__Bacteria;p__Firmicutes;c__Clostridia;o__Clostridia_UCG-014;f__;g__;s__
OTU_256	24	6	3	17	13	9	0	20	7	k__Bacteria;p__Proteobacteria;c__Gammaproteobacteria;o__Enterobacterales;f__Enterobacteriaceae;g__Escherichia-Shigella;s__Escherichia_coli
OTU_257	20	10	39	15	98	1	21	47	5	k__Bacteria;p__Firmicutes;c__Clostridia;o__Lachnospirales;f__Lachnospiraceae
OTU_258	2	5	6	2	1	2	1	7	51	k__Bacteria;p__Firmicutes;c__Clostridia;o__Oscillospirales;f__Ruminococcaceae;g__CAG-352;s__
OTU_259	1	18	3	4	2	0	12	26	10	k__Bacteria;p__Firmicutes;c__Clostridia;o__Lachnospirales;f__Lachnospiraceae;g__Lachnospiraceae_NK3A20_group;s__
OTU_260	2	5	0	13	0	0	1	3	29	k__Bacteria;p__Gracilibacteria;c__unidentified_Gracilibacteria;o__Absconditabacteriales_(SR1);f__;g__;s__
OTU_261	0	2	4	1	2	91	0	35	0	k__Bacteria;p__Firmicutes;c__Clostridia;o__Lachnospirales;f__Lachnospiraceae;g__Fusicatenibacter;s__
OTU_262	5	16	2	24	3	8	3	9	1	k__Bacteria;p__Firmicutes;c__Clostridia;o__Oscillospirales;f__Butyricicoccaceae;g__UCG-009;s__
OTU_263	19	2	1	1	0	2	0	1	29	k__Bacteria;p__Cyanobacteria;c__Vampirivibrionia;o__Gastranaerophilales;f__;g__;s__
OTU_264	7	54	4	1	0	8	1	0	1	k__Bacteria;p__Firmicutes;c__Clostridia;o__Oscillospirales;f__Oscillospiraceae
OTU_265	25	16	3	49	3	0	1	11	0	k__Bacteria;p__Firmicutes;c__Clostridia;o__Lachnospirales;f__Lachnospiraceae;g__Lachnospiraceae_NK4A136_group;s__
OTU_266	2	12	14	25	6	4	4	2	7	k__Bacteria;p__Firmicutes;c__Clostridia;o__Lachnospirales;f__Lachnospiraceae;g__Oribacterium;s__
OTU_267	15	5	3	123	2	5	1	1	3	k__Bacteria;p__Bacteroidota;c__Bacteroidia;o__Bacteroidales;f__F082;g__;s__
OTU_268	2	3	42	2	5	0	2	41	2	k__Bacteria;p__Bacteroidota;c__Bacteroidia;o__Bacteroidales;f__Rikenellaceae;g__Rikenellaceae_RC9_gut_group;s__
OTU_269	1	24	0	19	48	2	1	38	0	k__Bacteria;p__Bacteroidota;c__Bacteroidia;o__Bacteroidales;f__Rikenellaceae;g__Rikenellaceae_RC9_gut_group;s__
OTU_270	22	6	1	3	0	7	20	25	14	k__Bacteria;p__Bacteroidota;c__Bacteroidia;o__Bacteroidales;f__Prevotellaceae;g__Prevotellaceae_NK3B31_group;s__
OTU_271	0	0	0	0	1	127	1	0	0	k__Bacteria;p__Bacteroidota;c__Bacteroidia;o__Bacteroidales;f__Prevotellaceae;g__Prevotellaceae_NK3B31_group;s__Prevotella_sp_109
OTU_272	5	1	24	3	24	23	3	1	2	k__Bacteria;p__Firmicutes;c__Clostridia;o__Oscillospirales;f__Ruminococcaceae;g__;s__
OTU_273	15	71	113	7	17	71	9	15	10	k__Bacteria;p__Firmicutes;c__Clostridia;o__Christensenellales;f__Christensenellaceae;g__Christensenellaceae_R-7_group;s__
OTU_274	3	3	6	8	4	3	107	3	3	k__Bacteria
OTU_275	6	8	5	1	40	15	23	5	2	k__Bacteria;p__Firmicutes;c__Clostridia;o__Lachnospirales;f__Lachnospiraceae;g__[Eubacterium]_ruminantium_group;s__
OTU_276	4	14	3	3	2	65	11	1	0	k__Bacteria;p__Firmicutes;c__Clostridia;o__Clostridia_UCG-014;f__;g__;s__
OTU_277	8	4	37	11	1	3	10	14	24	k__Bacteria;p__Bacteroidota;c__Bacteroidia;o__Bacteroidales;f__Prevotellaceae;g__Prevotellaceae_UCG-003;s__
OTU_278	6	9	6	2	1	13	1	7	10	k__Bacteria;p__Firmicutes;c__Clostridia;o__Clostridia_vadinBB60_group;f__;g__;s__
OTU_279	14	7	13	6	20	8	6	7	5	k__Bacteria;p__unidentified_Bacteria;c__Coriobacteriia;o__Coriobacteriales;f__;g__;s__
OTU_280	29	19	26	17	13	3	8	29	14	k__Bacteria;p__Firmicutes;c__Clostridia;o__Oscillospirales;f__Ruminococcaceae;g__Negativibacillus;s__
OTU_281	3	4	7	13	28	14	6	0	1	k__Bacteria;p__unidentified_Bacteria;c__Bacilli;o__Erysipelotrichales;f__Erysipelatoclostridiaceae;g__;s__
OTU_282	7	1	8	4	43	2	25	8	7	k__Bacteria;p__Firmicutes;c__Negativicutes;o__Veillonellales-Selenomonadales;f__Selenomonadaceae;g__Veillonellaceae_UCG-001;s__
OTU_283	18	29	10	23	17	15	14	14	4	k__Bacteria;p__Firmicutes;c__Clostridia;o__Clostridia_UCG-014;f__;g__;s__
OTU_284	27	22	4	3	1	11	83	0	0	k__Bacteria;p__Bacteroidota;c__Bacteroidia;o__Bacteroidales
OTU_285	3	4	16	11	24	4	0	4	0	k__Bacteria;p__Bacteroidota;c__Bacteroidia;o__Bacteroidales;f__Prevotellaceae;g__Prevotella;s__
OTU_286	2	5	7	4	6	10	16	1	0	k__Bacteria;p__Firmicutes;c__Clostridia;o__Oscillospirales;f__UCG-010;g__;s__
OTU_287	41	3	20	5	13	0	1	23	3	k__Bacteria;p__Campilobacterota;c__Campylobacteria;o__Campylobacterales;f__Helicobacteraceae;g__Helicobacter;s__Helicobacter_apodemus
OTU_288	29	27	45	42	35	21	8	2	6	k__Bacteria;p__Firmicutes;c__Clostridia;o__Oscillospirales;f__Ruminococcaceae;g__Ruminococcus
OTU_289	14	23	189	51	118	16	9	17	15	k__Bacteria;p__Firmicutes;c__Clostridia;o__Oscillospirales;f__Ruminococcaceae;g__Ruminococcus
OTU_290	0	0	20	0	22	0	1	0	11	k__Bacteria;p__Bacteroidota;c__Bacteroidia;o__Bacteroidales;f__Prevotellaceae;g__Prevotella;s__
OTU_291	11	15	8	0	5	1	0	1	7	k__Bacteria;p__Elusimicrobia;c__unidentified_Elusimicrobia;o__Elusimicrobiales;f__Elusimicrobiaceae;g__Elusimicrobium;s__
OTU_292	6	7	20	9	0	3	6	10	0	k__Bacteria;p__Firmicutes;c__Clostridia;o__Oscillospirales;f__UCG-010;g__;s__
OTU_293	24	22	16	18	10	11	11	19	3	k__Bacteria;p__Firmicutes;c__Clostridia;o__Lachnospirales;f__Lachnospiraceae;g__Lachnospiraceae_NK4B4_group;s__
OTU_294	7	60	7	43	10	1	3	0	0	k__Bacteria;p__Bacteroidota;c__Bacteroidia;o__Bacteroidales;f__Rikenellaceae;g__Rikenellaceae_RC9_gut_group;s__
OTU_295	9	6	7	1	2	7	16	24	29	k__Bacteria;p__Firmicutes;c__Negativicutes;o__Veillonellales-Selenomonadales;f__Selenomonadaceae;g__Mitsuokella;s__
OTU_296	10	3	10	5	7	14	31	5	5	k__Bacteria;p__Firmicutes;c__Clostridia;o__Clostridia_vadinBB60_group;f__;g__;s__
OTU_297	0	41	0	2	2	2	2	1	1	k__Bacteria;p__Firmicutes;c__Clostridia;o__Oscillospirales;f__UCG-010;g__;s__
OTU_298	1	3	2	2	1	15	3	2	10	k__Bacteria;p__Verrucomicrobiota;c__Lentisphaeria;o__Victivallales;f__vadinBE97;g__;s__
OTU_299	1	0	19	3	3	3	4	29	20	k__Bacteria;p__Firmicutes;c__Clostridia;o__Lachnospirales;f__Lachnospiraceae;g__Lachnospiraceae_NK3A20_group;s__
OTU_300	1	3	5	7	22	15	0	1	5	k__Bacteria;p__Firmicutes;c__Clostridia
OTU_301	6	27	0	37	6	1	1	13	0	k__Bacteria;p__Firmicutes;c__Clostridia;o__Lachnospirales;f__Lachnospiraceae
OTU_302	3	3	23	1	7	12	13	18	1	k__Bacteria;p__Firmicutes;c__Clostridia;o__Oscillospirales;f__Ruminococcaceae;g__[Eubacterium]_siraeum_group;s__
OTU_303	3	0	1	3	2	0	17	126	9	k__Bacteria;p__Bacteroidota;c__Bacteroidia;o__Bacteroidales;f__Rikenellaceae;g__Rikenellaceae_RC9_gut_group;s__
OTU_304	5	3	12	5	2	14	18	1	12	k__Bacteria;p__Verrucomicrobiota;c__Kiritimatiellae;o__WCHB1-41;f__;g__;s__
OTU_305	26	18	12	11	4	2	1	4	14	k__Bacteria;p__unidentified_Bacteria;c__Desulfovibrionia;o__Desulfovibrionales;f__Desulfovibrionaceae;g__;s__
OTU_306	4	11	0	1	3	22	1	3	0	k__Bacteria
OTU_307	4	9	47	5	14	6	20	1	9	k__Bacteria;p__Firmicutes;c__Clostridia;o__Oscillospirales;f__[Eubacterium]_coprostanoligenes_group;g__;s__
OTU_308	11	14	12	20	0	2	1	5	0	k__Bacteria;p__Bacteroidota;c__Bacteroidia;o__Bacteroidales;f__Prevotellaceae;g__Prevotella;s__
OTU_309	6	17	3	0	3	53	10	16	1	k__Bacteria;p__Firmicutes;c__Clostridia;o__Oscillospirales;f__Oscillospiraceae;g__UCG-002;s__
OTU_310	0	0	1	0	0	1	0	17	24	k__Archaea;p__unidentified_Archaea;c__Thermoplasmata;o__Methanomassiliicoccales;f__Methanomethylophilaceae;g__;s__
OTU_311	12	5	28	7	19	11	7	22	13	k__Bacteria;p__Firmicutes;c__Clostridia;o__Monoglobales;f__Monoglobaceae;g__Monoglobus;s__
OTU_312	3	8	3	2	8	6	9	19	1	k__Bacteria;p__Bacteroidota;c__Bacteroidia;o__Bacteroidales;f__Bacteroidales_RF16_group;g__;s__
OTU_313	17	14	51	19	18	5	4	38	30	k__Bacteria;p__Firmicutes;c__Clostridia;o__Lachnospirales;f__Lachnospiraceae
OTU_314	10	17	8	11	3	2	2	1	11	k__Bacteria;p__Elusimicrobia;c__unidentified_Elusimicrobia;o__Elusimicrobiales;f__Elusimicrobiaceae;g__Elusimicrobium;s__
OTU_315	11	9	6	2	2	8	3	16	25	k__Bacteria;p__Firmicutes;c__Clostridia;o__Lachnospirales;f__Lachnospiraceae
OTU_316	10	7	3	7	10	19	8	13	6	k__Bacteria;p__Firmicutes;c__Clostridia;o__Peptostreptococcales-Tissierellales;f__Anaerovoracaceae;g__Anaerovorax;s__
OTU_317	2	1	8	0	0	1	0	1	38	k__Bacteria;p__Cyanobacteria;c__Vampirivibrionia;o__Gastranaerophilales;f__;g__;s__
OTU_318	30	32	15	9	8	55	17	4	14	k__Bacteria;p__Firmicutes;c__Negativicutes;o__Veillonellales-Selenomonadales;f__Selenomonadaceae;g__Selenomonas;s__Selenomonas_sp_MCB2
OTU_319	3	4	0	3	2	0	7	2	39	k__Bacteria;p__Cyanobacteria;c__Vampirivibrionia;o__Gastranaerophilales;f__;g__;s__
OTU_320	0	65	3	0	3	5	2	4	0	k__Bacteria;p__Cyanobacteria;c__Vampirivibrionia;o__Gastranaerophilales;f__;g__;s__
OTU_321	1	13	0	3	29	2	0	0	1	k__Bacteria;p__Firmicutes
OTU_322	6	8	1	2	1	27	0	1	1	k__Bacteria;p__Firmicutes;c__Clostridia;o__Oscillospirales
OTU_323	3	7	0	2	28	4	0	0	1	k__Bacteria
OTU_324	2	2	67	1	0	4	0	1	1	k__Bacteria;p__Bacteroidota;c__Bacteroidia;o__Bacteroidales;f__Muribaculaceae;g__;s__
OTU_325	33	47	3	0	0	0	1	0	0	k__Bacteria;p__Bacteroidota;c__Bacteroidia;o__Bacteroidales;f__Prevotellaceae;g__Prevotella;s__
OTU_326	5	20	9	9	1	2	2	4	11	k__Bacteria;p__Desulfobacterota;c__Desulfovibrionia;o__Desulfovibrionales;f__Desulfovibrionaceae;g__Mailhella;s__
OTU_327	1	24	1	2	4	11	2	0	1	k__Bacteria;p__Firmicutes;c__Clostridia;o__Oscillospirales;f__Ruminococcaceae;g__Candidatus_Soleaferrea;s__
OTU_328	0	26	39	2	4	1	12	0	5	k__Bacteria;p__Bacteroidota;c__Bacteroidia;o__Bacteroidales;f__Prevotellaceae;g__Prevotella;s__
OTU_329	1	1	0	1	31	1	0	1	2	k__Bacteria;p__unidentified_Bacteria;c__Alphaproteobacteria;o__Rhodospirillales;f__;g__;s__
OTU_330	0	0	0	4	4	35	16	1	14	k__Bacteria;p__Verrucomicrobiota;c__Kiritimatiellae;o__WCHB1-41;f__;g__;s__
OTU_331	8	2	4	14	1	34	2	3	0	k__Bacteria;p__Firmicutes;c__Clostridia;o__Clostridia_UCG-014;f__;g__;s__
OTU_332	1	0	0	0	1	103	1	1	0	k__Bacteria;p__Firmicutes;c__Clostridia;o__Oscillospirales;f__Ruminococcaceae;g__Ruminococcus;s__
OTU_333	9	14	4	14	8	8	3	8	7	k__Bacteria;p__Firmicutes;c__Clostridia;o__Lachnospirales;f__Lachnospiraceae
OTU_334	12	33	8	3	8	29	36	4	1	k__Bacteria;p__Firmicutes;c__Bacilli;o__RF39;f__;g__;s__
OTU_335	81	22	2	1	1	6	1	0	1	k__Bacteria;p__Bacteroidota;c__Bacteroidia;o__Bacteroidales;f__Rikenellaceae;g__Rikenellaceae_RC9_gut_group;s__
OTU_336	12	13	43	3	9	24	36	4	11	k__Bacteria;p__Firmicutes;c__Clostridia;o__Oscillospirales;f__Oscillospiraceae;g__UCG-002;s__
OTU_337	16	1	36	4	49	4	12	25	14	k__Bacteria;p__Firmicutes;c__Bacilli;o__Erysipelotrichales;f__Erysipelotrichaceae;g__Allobaculum;s__
OTU_338	1	3	0	7	2	2	17	0	8	k__Bacteria;p__Firmicutes;c__Clostridia;o__Lachnospirales;f__Lachnospiraceae;g__Lachnospiraceae_ND3007_group
OTU_339	2	14	0	23	5	17	0	0	2	k__Bacteria;p__Bacteroidota;c__Bacteroidia;o__Bacteroidales;f__Prevotellaceae;g__Prevotellaceae_UCG-001;s__
OTU_340	6	1	9	6	9	28	1	1	4	k__Bacteria;p__Bacteroidota;c__Bacteroidia;o__Bacteroidales;f__Prevotellaceae;g__Prevotella;s__Prevotella_sp_BP1-145
OTU_341	12	5	1	14	12	14	4	1	4	k__Bacteria;p__Firmicutes;c__Clostridia;o__Lachnospirales;f__Lachnospiraceae
OTU_342	12	12	23	13	4	2	5	34	1	k__Bacteria;p__Bacteroidota;c__Bacteroidia;o__Bacteroidales;f__Rikenellaceae;g__Rikenellaceae_RC9_gut_group;s__
OTU_343	17	6	7	8	15	12	20	2	2	k__Bacteria;p__Firmicutes;c__Clostridia;o__Oscillospirales;f__Oscillospiraceae;g__UCG-002;s__
OTU_344	6	16	4	2	1	0	4	27	0	k__Bacteria;p__Bacteroidota;c__Bacteroidia;o__Bacteroidales;f__Rikenellaceae;g__Rikenellaceae_RC9_gut_group;s__
OTU_345	4	1	49	0	23	4	0	1	3	k__Bacteria;p__Bacteroidota;c__Bacteroidia;o__Bacteroidales;f__Muribaculaceae;g__;s__
OTU_346	5	2	1	26	4	4	15	1	0	k__Bacteria;p__Firmicutes;c__Bacilli;o__Staphylococcales;f__Staphylococcaceae;g__Staphylococcus;s__Staphylococcus_nepalensis
OTU_347	5	3	1	45	17	2	3	6	3	k__Bacteria;p__Bacteroidota;c__Bacteroidia;o__Bacteroidales;f__Prevotellaceae;g__Prevotella;s__
OTU_348	8	1	17	3	6	8	2	7	4	k__Bacteria;p__Proteobacteria;c__Gammaproteobacteria;o__Pasteurellales;f__Pasteurellaceae;g__Mannheimia;s__Mannheimia_haemolytica
OTU_349	1	22	4	6	0	11	3	0	6	k__Bacteria;p__Firmicutes;c__Clostridia;o__Lachnospirales;f__Lachnospiraceae;g__Roseburia
OTU_350	1	38	6	0	4	3	1	21	1	k__Bacteria;p__Firmicutes;c__Clostridia;o__Oscillospirales;f__Ruminococcaceae;g__Ruminococcus
OTU_351	19	205	3	8	1	42	1	4	0	k__Bacteria;p__Bacteroidota;c__Bacteroidia;o__Bacteroidales;f__Prevotellaceae;g__Prevotella;s__
OTU_352	1	15	7	4	1	2	3	2	33	k__Bacteria;p__Spirochaetota;c__Spirochaetia;o__Spirochaetales;f__Spirochaetaceae;g__Treponema
OTU_353	2	0	10	0	3	12	4	0	1	k__Bacteria;p__unidentified_Bacteria;c__Alphaproteobacteria;o__Rickettsiales;f__;g__;s__
OTU_354	12	10	7	7	8	6	6	11	5	k__Bacteria;p__Firmicutes;c__Clostridia;o__Lachnospirales;f__Lachnospiraceae;g__Syntrophococcus;s__
OTU_355	4	8	1	6	8	4	9	8	1	k__Bacteria;p__Firmicutes;c__Bacilli;o__Erysipelotrichales;f__Erysipelatoclostridiaceae;g__UCG-004;s__
OTU_356	1	2	12	3	0	1	4	3	3	k__Bacteria;p__Firmicutes;c__Clostridia;o__Lachnospirales;f__Lachnospiraceae;g__Moryella;s__
OTU_357	6	7	1	10	2	0	3	23	0	k__Bacteria;p__Firmicutes;c__Clostridia;o__Peptostreptococcales-Tissierellales;f__Anaerovoracaceae;g__Family_XIII_AD3011_group;s__
OTU_358	17	21	0	8	0	5	19	4	3	k__Bacteria;p__Bacteroidota;c__Bacteroidia;o__Bacteroidales;f__Prevotellaceae;g__Prevotellaceae_UCG-001;s__
OTU_359	2	3	1	0	3	2	3	0	38	k__Bacteria;p__Cyanobacteria;c__Vampirivibrionia;o__Gastranaerophilales;f__;g__;s__
OTU_360	2	0	4	6	2	28	1	1	1	k__Bacteria;p__Cyanobacteria;c__Vampirivibrionia;o__Gastranaerophilales;f__;g__;s__
OTU_361	0	1	1	17	4	34	0	0	6	k__Archaea
OTU_362	2	28	8	3	3	41	1	0	14	k__Bacteria;p__unidentified_Bacteria;c__Alphaproteobacteria;o__Rhodospirillales;f__;g__;s__
OTU_363	8	15	17	9	1	1	5	1	0	k__Bacteria;p__Firmicutes;c__Clostridia;o__Oscillospirales;f__Oscillospiraceae;g__Papillibacter;s__
OTU_364	3	3	5	10	37	2	13	38	5	k__Bacteria;p__Desulfobacterota;c__Desulfovibrionia;o__Desulfovibrionales;f__Desulfovibrionaceae;g__Desulfovibrio;s__
OTU_365	15	51	8	2	4	9	4	4	1	k__Bacteria;p__Firmicutes;c__Clostridia;o__Clostridia_UCG-014;f__;g__;s__
OTU_366	4	4	27	7	3	11	28	3	0	k__Bacteria;p__Firmicutes;c__Bacilli;o__RF39;f__;g__;s__
OTU_367	9	10	8	33	19	11	3	12	110	k__Bacteria;p__Cyanobacteria;c__Vampirivibrionia;o__Gastranaerophilales;f__;g__;s__
OTU_368	0	0	0	0	0	39	0	0	0	k__Bacteria;p__Firmicutes;c__Clostridia;o__Oscillospirales;f__Ruminococcaceae;g__[Eubacterium]_siraeum_group;s__
OTU_369	19	32	36	30	18	29	11	6	17	k__Bacteria;p__Desulfobacterota;c__Desulfovibrionia;o__Desulfovibrionales;f__Desulfovibrionaceae;g__Desulfovibrio
OTU_370	16	83	1	26	19	2	0	0	1	k__Bacteria;p__Bacteroidota;c__Bacteroidia;o__Bacteroidales;f__Rikenellaceae;g__Rikenellaceae_RC9_gut_group
OTU_371	11	2	1	9	0	0	2	6	1	k__Bacteria;p__Firmicutes
OTU_372	12	13	1	4	2	2	0	1	1	k__Bacteria;p__unidentified_Bacteria;c__Clostridia;o__;f__;g__;s__
OTU_373	62	1	1	0	0	0	0	0	0	k__Bacteria;p__Bacteroidota;c__Bacteroidia;o__Bacteroidales;f__Prevotellaceae;g__Prevotella
OTU_374	9	8	15	5	1	2	4	16	1	k__Bacteria;p__unidentified_Bacteria;c__Bacteroidia;o__Bacteroidales;f__;g__;s__
OTU_375	15	9	1	40	1	1	0	3	2	k__Bacteria
OTU_376	3	7	11	15	7	4	6	6	4	k__Bacteria;p__unidentified_Bacteria;c__Bacilli;o__Erysipelotrichales;f__Erysipelotrichaceae;g__;s__
OTU_377	1	16	4	21	10	4	5	11	1	k__Bacteria;p__Firmicutes;c__Clostridia;o__Oscillospirales;f__[Eubacterium]_coprostanoligenes_group
OTU_378	21	22	23	31	14	27	15	16	6	k__Bacteria;p__Firmicutes;c__Clostridia;o__Oscillospirales;f__Oscillospiraceae;g__Intestinimonas;s__
OTU_379	5	3	7	9	5	4	10	1	23	k__Bacteria;p__Firmicutes;c__Clostridia;o__Lachnospirales;f__Lachnospiraceae;g__Lachnoclostridium;s__[Clostridium]_aminophilum
OTU_380	28	11	4	16	6	33	7	7	5	k__Bacteria;p__Firmicutes;c__Clostridia;o__Monoglobales;f__Monoglobaceae;g__Monoglobus;s__
OTU_381	3	0	3	1	13	3	10	21	3	k__Bacteria;p__Firmicutes;c__Clostridia;o__Lachnospirales;f__Lachnospiraceae;g__[Ruminococcus]_gauvreauii_group;s__
OTU_382	11	8	13	19	20	9	16	8	3	k__Bacteria;p__Bacteroidota;c__Bacteroidia;o__Bacteroidales;f__Muribaculaceae;g__;s__
OTU_383	8	4	15	26	24	7	2	5	11	k__Bacteria;p__Bacteroidota;c__Bacteroidia;o__Bacteroidales;f__Muribaculaceae;g__;s__
OTU_384	7	12	2	2	1	2	3	3	2	k__Bacteria;p__unidentified_Bacteria;c__Clostridia;o__;f__;g__;s__
OTU_385	4	5	0	1	1	0	0	13	19	k__Bacteria;p__Bacteroidota;c__Bacteroidia;o__Bacteroidales;f__Prevotellaceae;g__Prevotella;s__
OTU_386	49	28	71	22	18	47	25	16	4	k__Bacteria;p__Firmicutes;c__Clostridia;o__Clostridia_UCG-014;f__;g__;s__
OTU_387	9	4	23	9	6	2	9	7	3	k__Bacteria;p__Bacteroidota;c__Bacteroidia;o__Bacteroidales;f__Bacteroidaceae;g__Bacteroides;s__
OTU_388	4	4	2	24	1	3	2	13	0	k__Bacteria;p__Bacteroidota;c__Bacteroidia;o__Bacteroidales;f__Prevotellaceae
OTU_389	2	0	39	15	0	1	0	0	0	k__Bacteria;p__Bacteroidota;c__Bacteroidia;o__Bacteroidales;f__Prevotellaceae;g__Prevotella;s__
OTU_390	2	0	1	2	2	3	1	30	1	k__Bacteria;p__Firmicutes;c__Clostridia;o__Oscillospirales;f__Ruminococcaceae
OTU_391	0	2	2	6	11	2	5	5	18	k__Bacteria;p__Firmicutes;c__Clostridia;o__Lachnospirales;f__Lachnospiraceae;g__Moryella;s__bacterium_YAD2002
OTU_392	5	69	1	7	3	2	11	23	0	k__Bacteria;p__Firmicutes;c__Bacilli;o__Erysipelotrichales;f__Erysipelatoclostridiaceae;g__Sharpea;s__
OTU_393	5	3	0	0	0	2	14	0	2	k__Bacteria;p__Cyanobacteria;c__Vampirivibrionia;o__Gastranaerophilales;f__;g__;s__
OTU_394	0	0	0	0	1	56	0	34	0	k__Bacteria;p__Bacteroidota;c__Bacteroidia;o__Bacteroidales;f__Bacteroidaceae;g__Bacteroides;s__Bacteroides_dorei
OTU_395	3	3	16	0	11	6	5	3	2	k__Bacteria;p__Firmicutes;c__Clostridia;o__Oscillospirales;f__UCG-010;g__;s__
OTU_396	0	2	2	1	8	21	14	0	5	k__Bacteria;p__Bacteroidota;c__Bacteroidia;o__Bacteroidales;f__Prevotellaceae;g__Prevotella
OTU_397	15	1	0	38	2	0	0	0	0	k__Bacteria;p__Firmicutes;c__Clostridia;o__Lachnospirales;f__Lachnospiraceae
OTU_398	0	0	0	0	0	70	0	4	0	k__Bacteria;p__Firmicutes;c__Clostridia;o__Lachnospirales;f__Lachnospiraceae;g__[Eubacterium]_hallii_group;s__
OTU_399	1	3	0	1	0	25	17	0	15	k__Bacteria;p__Bacteroidota;c__Bacteroidia;o__Bacteroidales;f__Prevotellaceae;g__Prevotella
OTU_400	7	13	10	12	8	5	3	2	6	k__Bacteria;p__Firmicutes;c__Clostridia;o__Peptostreptococcales-Tissierellales;f__Anaerovoracaceae;g__[Eubacterium]_nodatum_group;s__
OTU_401	1	4	2	0	1	2	10	30	2	k__Bacteria;p__Firmicutes;c__Clostridia;o__Oscillospirales;f__[Eubacterium]_coprostanoligenes_group;g__;s__
OTU_402	0	3	4	0	0	2	0	9	22	k__Bacteria;p__Firmicutes;c__Clostridia;o__unidentified_Clostridia;f__Ruminococcaceae
OTU_403	18	0	5	2	20	1	17	15	8	k__Bacteria;p__Firmicutes;c__Clostridia;o__Lachnospirales;f__Lachnospiraceae
OTU_404	4	0	8	98	6	7	2	2	0	k__Bacteria;p__Bacteroidota;c__Bacteroidia;o__Bacteroidales;f__Muribaculaceae;g__;s__
OTU_405	1	25	30	10	4	1	5	50	8	k__Bacteria;p__Firmicutes;c__Clostridia;o__Lachnospirales;f__Lachnospiraceae;g__Anaerostipes;s__
OTU_406	0	0	8	1	27	0	0	0	3	k__Bacteria;p__Bacteroidota;c__Bacteroidia;o__Bacteroidales;f__Prevotellaceae;g__Prevotellaceae_NK3B31_group;s__
OTU_407	6	3	0	15	1	1	2	0	7	k__Bacteria;p__Firmicutes;c__Clostridia;o__Clostridia_vadinBB60_group;f__;g__;s__
OTU_408	26	18	30	22	23	14	43	15	4	k__Bacteria;p__Firmicutes;c__Clostridia;o__Christensenellales;f__Christensenellaceae;g__Christensenellaceae_R-7_group;s__
OTU_409	16	1	11	8	7	7	1	0	0	k__Bacteria;p__Bacteroidota;c__Bacteroidia;o__Bacteroidales;f__Muribaculaceae;g__;s__
OTU_410	1	1	1	1	18	3	0	2	0	k__Bacteria;p__Firmicutes;c__Clostridia;o__Oscillospirales;f__Oscillospiraceae;g__Colidextribacter
OTU_411	1	10	7	3	0	0	12	1	6	k__Bacteria;p__Firmicutes;c__Clostridia;o__Oscillospirales;f__Oscillospiraceae;g__UCG-002;s__
OTU_412	17	1	35	10	11	2	1	3	1	k__Bacteria;p__Bacteroidota;c__Bacteroidia;o__Bacteroidales;f__Muribaculaceae;g__;s__
OTU_413	3	17	3	13	11	4	6	3	2	k__Bacteria;p__Firmicutes;c__Clostridia;o__Oscillospirales;f__UCG-010;g__;s__
OTU_414	5	1	12	4	2	13	4	0	12	k__Bacteria;p__Spirochaetota;c__Spirochaetia;o__Spirochaetales;f__Spirochaetaceae
OTU_415	34	33	27	14	6	12	7	8	0	k__Bacteria;p__Firmicutes;c__Clostridia;o__Clostridia_UCG-014;f__;g__;s__
OTU_416	0	8	2	14	5	15	2	1	2	k__Bacteria;p__Spirochaetota;c__Spirochaetia;o__Spirochaetales;f__Spirochaetaceae;g__Treponema
OTU_417	0	0	1	3	29	0	5	1	0	k__Bacteria;p__Firmicutes;c__Clostridia;o__Lachnospirales;f__Defluviitaleaceae;g__Defluviitaleaceae_UCG-011;s__
OTU_418	1	1	0	0	0	53	0	0	0	k__Bacteria;p__Bacteroidota;c__Bacteroidia;o__Bacteroidales;f__Prevotellaceae;g__Paraprevotella;s__
OTU_419	6	1	9	5	5	1	2	0	3	k__Bacteria;p__Firmicutes;c__Clostridia;o__Lachnospirales;f__Lachnospiraceae;g__Oribacterium;s__
OTU_420	0	0	0	2	4	18	1	2	2	k__Bacteria;p__Cyanobacteria;c__Vampirivibrionia;o__Gastranaerophilales;f__;g__;s__
OTU_421	3	2	0	1	5	1	4	2	42	k__Bacteria;p__Firmicutes;c__Negativicutes;o__Veillonellales-Selenomonadales;f__Veillonellaceae;g__Dialister
OTU_422	0	0	1	1	7	43	2	32	0	k__Bacteria;p__Firmicutes;c__Clostridia;o__Lachnospirales;f__Lachnospiraceae;g__Blautia
OTU_423	4	0	5	5	2	6	1	7	1	k__Bacteria;p__Firmicutes;c__Clostridia;o__Lachnospirales;f__Lachnospiraceae;g__Lachnoclostridium;s__bacterium_enrichment_culture_clone_R1-3
OTU_424	15	16	5	12	13	20	1	2	24	k__Bacteria;p__Cyanobacteria;c__Vampirivibrionia;o__Gastranaerophilales;f__;g__;s__
OTU_425	3	1	9	5	7	2	6	2	15	k__Bacteria;p__Firmicutes;c__Clostridia;o__Christensenellales;f__Christensenellaceae;g__Christensenellaceae_R-7_group;s__
OTU_426	7	4	8	2	3	1	0	6	2	k__Bacteria;p__Firmicutes;c__Clostridia;o__Oscillospirales
OTU_427	11	4	1	22	6	6	0	0	9	k__Bacteria;p__Bacteroidota;c__Bacteroidia;o__Bacteroidales;f__Muribaculaceae;g__;s__
OTU_428	0	8	1	0	3	0	36	1	26	k__Archaea;p__Euryarchaeota;c__Methanobacteria;o__Methanobacteriales;f__Methanobacteriaceae;g__Methanobrevibacter;s__
OTU_429	89	83	14	16	20	15	12	66	29	k__Bacteria;p__Firmicutes;c__Clostridia;o__Oscillospirales;f__Oscillospiraceae;g__UCG-002;s__
OTU_430	11	1	0	15	0	7	0	0	2	k__Bacteria;p__Bacteroidota;c__Bacteroidia;o__Bacteroidales;f__Muribaculaceae;g__;s__
OTU_431	1	28	1	5	0	2	5	1	0	k__Bacteria;p__Firmicutes;c__Clostridia;o__Clostridia_vadinBB60_group;f__;g__;s__
OTU_432	9	23	4	9	5	7	5	25	2	k__Bacteria;p__Firmicutes;c__Clostridia;o__Oscillospirales;f__UCG-010;g__;s__
OTU_433	5	2	3	5	0	6	22	1	3	k__Bacteria;p__Firmicutes;c__Clostridia;o__Lachnospirales;f__Lachnospiraceae;g__Lachnospiraceae_UCG-008;s__
OTU_434	2	15	0	0	2	3	3	1	22	k__Bacteria;p__Firmicutes;c__Clostridia;o__Clostridia_vadinBB60_group;f__;g__;s__
OTU_435	0	8	9	2	6	1	1	5	10	k__Bacteria;p__Firmicutes;c__Negativicutes;o__Veillonellales-Selenomonadales;f__Selenomonadaceae;g__Quinella;s__
OTU_436	6	11	6	8	4	3	7	6	5	k__Bacteria;p__Firmicutes;c__Clostridia;o__Lachnospirales;f__Lachnospiraceae;g__GCA-900066575;s__
OTU_437	28	3	3	19	3	7	9	3	5	k__Bacteria;p__Bacteroidota;c__Bacteroidia;o__Bacteroidales;f__Prevotellaceae;g__Prevotella
OTU_438	1	3	9	4	4	1	4	1	1	k__Bacteria;p__Firmicutes;c__Clostridia;o__Oscillospirales;f__[Eubacterium]_coprostanoligenes_group;g__;s__
OTU_439	8	7	8	18	7	2	16	4	1	k__Bacteria;p__Bacteroidota;c__Bacteroidia;o__Bacteroidales;f__Prevotellaceae;g__Prevotellaceae_UCG-004;s__
OTU_440	6	8	13	8	1	22	1	6	6	k__Bacteria;p__Firmicutes;c__Clostridia;o__Oscillospirales;f__Ruminococcaceae;g__Ruminococcus;s__
OTU_441	47	19	0	5	1	1	0	1	1	k__Bacteria;p__Firmicutes;c__Clostridia;o__Oscillospirales;f__Oscillospiraceae
OTU_442	0	2	11	0	1	1	7	5	0	k__Bacteria;p__Firmicutes;c__Clostridia;o__Oscillospirales;f__[Eubacterium]_coprostanoligenes_group;g__;s__
OTU_443	4	3	2	3	2	2	4	4	2	k__Bacteria;p__unidentified_Bacteria;c__Clostridia;o__Oscillospirales;f__Ruminococcaceae;g__;s__
OTU_444	0	1	0	0	0	65	0	17	1	k__Bacteria;p__Bacteroidota;c__Bacteroidia;o__Bacteroidales;f__Bacteroidaceae;g__Bacteroides;s__Bacteroides_uniformis
OTU_445	0	3	13	2	0	11	0	0	5	k__Bacteria;p__Firmicutes;c__Clostridia;o__Oscillospirales;f__[Eubacterium]_coprostanoligenes_group;g__;s__
OTU_446	9	4	10	7	1	0	13	10	5	k__Bacteria;p__Firmicutes;c__Clostridia;o__Christensenellales;f__Christensenellaceae;g__Christensenellaceae_R-7_group;s__
OTU_447	39	58	56	25	19	15	3	23	27	k__Bacteria;p__Firmicutes;c__Clostridia;o__Oscillospirales;f__Oscillospiraceae;g__Colidextribacter;s__
OTU_448	3	38	2	51	1	13	0	19	1	k__Bacteria;p__Firmicutes;c__Clostridia;o__Clostridia_UCG-014;f__;g__;s__
OTU_449	0	0	0	0	0	38	0	35	0	k__Bacteria;p__Bacteroidota;c__Bacteroidia;o__Bacteroidales;f__Bacteroidaceae;g__Bacteroides;s__Bacteroides_stercoris
OTU_450	3	13	5	6	1	13	7	3	5	k__Bacteria;p__Firmicutes
OTU_451	5	2	11	3	1	10	10	0	3	k__Bacteria;p__Firmicutes;c__Clostridia;o__Peptostreptococcales-Tissierellales;f__Anaerovoracaceae;g__Family_XIII_UCG-001;s__
OTU_452	12	6	21	17	12	0	1	7	0	k__Bacteria;p__Bacteroidota;c__Bacteroidia;o__Bacteroidales;f__Prevotellaceae;g__Prevotellaceae_UCG-001;s__
OTU_453	107	15	42	69	12	33	210	7	16	k__Bacteria;p__Bacteroidota;c__Bacteroidia;o__Bacteroidales;f__Prevotellaceae;g__Prevotella;s__
OTU_454	2	0	0	1	0	2	1	15	3	k__Bacteria;p__Firmicutes;c__Clostridia;o__Oscillospirales;f__[Eubacterium]_coprostanoligenes_group;g__;s__
OTU_455	10	4	0	6	2	1	24	2	0	k__Bacteria;p__Firmicutes;c__Bacilli;o__Staphylococcales;f__Staphylococcaceae;g__Jeotgalicoccus
OTU_456	12	40	25	16	24	14	60	12	15	k__Bacteria;p__Firmicutes;c__Negativicutes;o__Veillonellales-Selenomonadales;f__Selenomonadaceae;g__Selenomonas;s__Selenomonas_ruminantium
OTU_457	0	11	1	0	0	0	2	0	9	k__Bacteria;p__Firmicutes;c__Clostridia;o__Monoglobales;f__Monoglobaceae;g__Monoglobus;s__
OTU_458	25	34	2	23	0	10	4	9	0	k__Bacteria;p__Bacteroidota;c__Bacteroidia;o__Bacteroidales;f__Muribaculaceae;g__;s__
OTU_459	6	3	2	5	1	9	4	1	2	k__Bacteria;p__Firmicutes;c__Clostridia;o__Lachnospirales;f__Lachnospiraceae
OTU_460	1	1	4	13	1	7	2	8	0	k__Bacteria;p__Firmicutes;c__Clostridia;o__Oscillospirales;f__Oscillospiraceae;g__NK4A214_group;s__
OTU_461	2	1	2	6	0	27	3	15	0	k__Bacteria;p__Firmicutes;c__Clostridia;o__Oscillospirales;f__Ruminococcaceae;g__Ruminococcus;s__
OTU_462	1	5	0	7	1	5	1	7	0	k__Bacteria;p__Firmicutes;c__Clostridia
OTU_463	8	9	15	13	7	1	6	3	8	k__Bacteria;p__Firmicutes;c__Clostridia;o__Christensenellales;f__Christensenellaceae;g__Christensenellaceae_R-7_group;s__
OTU_464	2	11	0	9	1	0	0	10	1	k__Bacteria;p__Bacteroidota;c__Bacteroidia;o__Bacteroidales;f__Rikenellaceae;g__Rikenellaceae_RC9_gut_group;s__
OTU_465	14	16	3	21	2	10	1	18	4	k__Bacteria;p__Bacteroidota;c__Bacteroidia;o__Bacteroidales;f__Muribaculaceae;g__;s__
OTU_466	0	2	9	3	5	5	0	2	7	k__Bacteria;p__Firmicutes;c__Clostridia;o__Clostridia_vadinBB60_group;f__;g__;s__
OTU_467	14	4	6	17	5	6	11	9	12	k__Bacteria;p__Firmicutes;c__Clostridia;o__Clostridia_UCG-014;f__;g__;s__
OTU_468	4	0	6	1	1	3	1	6	1	k__Bacteria;p__Firmicutes;c__Clostridia;o__Oscillospirales;f__Oscillospiraceae
OTU_469	4	2	3	0	0	1	1	14	0	k__Bacteria;p__Firmicutes;c__Clostridia;o__Oscillospirales;f__UCG-010;g__;s__
OTU_470	0	3	1	8	1	8	1	0	22	k__Bacteria;p__Cyanobacteria;c__Vampirivibrionia;o__Gastranaerophilales;f__;g__;s__
OTU_471	1	12	0	0	0	4	5	1	0	k__Bacteria;p__Firmicutes;c__Clostridia;o__Lachnospirales;f__Lachnospiraceae;g__Moryella;s__
OTU_472	2	25	5	0	0	2	1	0	0	k__Bacteria;p__Firmicutes;c__Bacilli;o__RF39;f__;g__;s__
OTU_473	9	3	10	43	12	8	12	25	9	k__Bacteria;p__Firmicutes;c__Bacilli;o__Erysipelotrichales;f__Erysipelotrichaceae;g__Faecalibaculum;s__
OTU_474	9	12	8	14	12	4	1	0	2	k__Bacteria;p__Bacteroidota;c__Bacteroidia;o__Bacteroidales;f__Rikenellaceae;g__Rikenellaceae_RC9_gut_group;s__
OTU_475	1	1	21	1	0	0	1	0	0	k__Bacteria;p__Proteobacteria;c__Gammaproteobacteria;o__Aeromonadales;f__Succinivibrionaceae;g__Anaerobiospirillum;s__
OTU_476	0	0	0	0	1	22	0	3	1	k__Bacteria;p__Bacteroidota;c__Bacteroidia;o__Bacteroidales;f__Bacteroidales_RF16_group;g__;s__
OTU_477	2	10	9	1	9	0	10	0	0	k__Bacteria;p__Firmicutes;c__Clostridia;o__Oscillospirales;f__Ruminococcaceae;g__Ruminococcus
OTU_478	3	2	14	5	0	4	0	0	0	k__Bacteria;p__Firmicutes;c__Negativicutes;o__Veillonellales-Selenomonadales;f__Selenomonadaceae;g__Schwartzia;s__
OTU_479	0	12	5	2	1	1	3	4	20	k__Bacteria;p__Firmicutes;c__Clostridia
OTU_480	13	13	13	20	8	12	8	7	7	k__Bacteria;p__unidentified_Bacteria;c__Clostridia;o__Oscillospirales;f__Oscillospiraceae;g__;s__
OTU_481	5	0	3	8	0	3	5	1	23	k__Bacteria;p__Cyanobacteria;c__Vampirivibrionia;o__Gastranaerophilales;f__;g__;s__
OTU_482	0	0	0	0	1	31	0	0	0	k__Bacteria;p__Firmicutes;c__Clostridia;o__Oscillospirales;f__[Eubacterium]_coprostanoligenes_group;g__;s__
OTU_483	1	4	8	1	3	28	5	3	1	k__Bacteria;p__Firmicutes;c__Clostridia;o__Lachnospirales;f__Lachnospiraceae
OTU_484	0	14	1	10	6	3	5	17	0	k__Bacteria;p__Firmicutes;c__Clostridia;o__Lachnospirales;f__Lachnospiraceae
OTU_485	3	4	1	0	0	0	1	25	0	k__Bacteria;p__Bacteroidota;c__Bacteroidia;o__Bacteroidales;f__Rikenellaceae;g__Rikenellaceae_RC9_gut_group;s__
OTU_486	33	42	15	48	11	13	10	15	9	k__Bacteria;p__Firmicutes;c__Clostridia;o__Clostridia_UCG-014;f__;g__;s__
OTU_487	2	9	0	15	4	4	3	4	11	k__Bacteria;p__Firmicutes;c__Clostridia;o__Clostridia_vadinBB60_group;f__;g__;s__
OTU_488	34	31	5	8	9	3	6	11	7	k__Bacteria;p__Firmicutes;c__Clostridia;o__Oscillospirales
OTU_489	1	0	2	1	1	0	0	28	0	k__Bacteria;p__Firmicutes;c__Clostridia;o__unidentified_Clostridia;f__Ruminococcaceae;g__;s__
OTU_490	9	0	2	3	2	5	2	11	9	k__Bacteria;p__Firmicutes;c__Clostridia;o__Christensenellales;f__Christensenellaceae;g__Christensenellaceae_R-7_group
OTU_491	0	0	0	0	0	45	0	0	0	k__Bacteria;p__Firmicutes;c__Clostridia;o__Oscillospirales;f__UCG-010;g__;s__
OTU_492	3	19	3	1	1	1	2	2	1	k__Bacteria;p__Firmicutes;c__Clostridia
OTU_493	1	30	7	4	4	0	1	10	6	k__Bacteria;p__Actinobacteriota;c__Coriobacteriia;o__Coriobacteriales;f__Atopobiaceae;g__Olsenella;s__
OTU_494	0	10	0	8	0	0	1	6	2	k__Bacteria;p__Actinobacteriota;c__Coriobacteriia;o__Coriobacteriales;f__Atopobiaceae;g__Coriobacteriaceae_UCG-002;s__
OTU_495	2	0	10	1	0	1	5	3	0	k__Bacteria
OTU_496	8	1	4	2	2	13	1	10	4	k__Bacteria;p__Firmicutes;c__Clostridia;o__Lachnospirales;f__Lachnospiraceae
OTU_497	0	0	6	0	16	1	0	5	0	k__Bacteria;p__Firmicutes;c__Clostridia;o__Oscillospirales;f__Butyricicoccaceae;g__UCG-008;s__
OTU_498	6	0	1	34	0	0	1	0	2	k__Bacteria;p__Bacteroidota;c__Bacteroidia;o__Bacteroidales;f__Prevotellaceae
OTU_499	2	6	1	3	3	7	21	3	11	k__Bacteria;p__Firmicutes;c__Negativicutes;o__Veillonellales-Selenomonadales;f__Veillonellaceae;g__Allisonella;s__
OTU_500	3	2	2	1	0	10	14	8	7	k__Bacteria;p__Cyanobacteria;c__Vampirivibrionia;o__Gastranaerophilales;f__;g__;s__
OTU_501	1	6	3	8	2	7	6	8	3	k__Bacteria;p__Firmicutes;c__Clostridia;o__Oscillospirales;f__Butyricicoccaceae;g__UCG-009;s__
OTU_502	6	8	3	9	3	1	0	2	0	k__Bacteria;p__Firmicutes;c__Clostridia;o__Lachnospirales;f__Lachnospiraceae
OTU_503	4	4	3	3	0	0	8	0	3	k__Bacteria;p__Verrucomicrobiota;c__Kiritimatiellae;o__WCHB1-41;f__;g__;s__
OTU_504	1	0	8	0	3	0	4	9	0	k__Bacteria;p__Firmicutes;c__Clostridia;o__Lachnospirales;f__Lachnospiraceae;g__Frisingicoccus;s__
OTU_505	2	3	8	0	0	6	0	0	0	k__Bacteria;p__Actinobacteriota;c__Coriobacteriia;o__Coriobacteriales;f__Atopobiaceae
OTU_506	5	3	2	1	3	1	0	5	3	k__Bacteria;p__Actinobacteriota;c__Actinobacteria;o__Micrococcales;f__Micrococcaceae;g__Rothia
OTU_507	11	4	0	11	1	0	0	2	1	k__Bacteria;p__unidentified_Bacteria;c__Clostridia;o__Christensenellales;f__Christensenellaceae;g__;s__
OTU_508	0	12	2	17	0	1	2	2	2	k__Bacteria;p__unidentified_Bacteria;c__Clostridia;o__Oscillospirales;f__Oscillospiraceae;g__;s__
OTU_509	3	4	4	1	2	2	1	13	1	k__Bacteria;p__Bacteroidota;c__Bacteroidia;o__Bacteroidales;f__Rikenellaceae;g__Rikenellaceae_RC9_gut_group;s__
OTU_510	5	11	1	1	4	4	0	19	0	k__Bacteria;p__Firmicutes;c__Clostridia;o__Oscillospirales;f__Oscillospiraceae;g__NK4A214_group;s__
OTU_511	3	5	8	8	1	0	0	0	1	k__Bacteria;p__Bacteroidota;c__Bacteroidia;o__Bacteroidales;f__Muribaculaceae;g__;s__
OTU_512	8	0	4	1	5	1	1	4	4	k__Bacteria
OTU_513	2	1	1	1	10	12	0	1	2	k__Bacteria;p__Desulfobacterota;c__Desulfovibrionia;o__Desulfovibrionales;f__Desulfovibrionaceae;g__Desulfovibrio
OTU_514	3	13	2	2	2	1	2	7	1	k__Bacteria;p__Firmicutes;c__Bacilli;o__Erysipelotrichales;f__Erysipelotrichaceae;g__Faecalibaculum;s__Faecalibaculum_rodentium
OTU_515	1	0	20	4	2	3	14	3	0	k__Bacteria;p__Firmicutes;c__Clostridia;o__Lachnospirales;f__Lachnospiraceae;g__Roseburia;s__
OTU_516	1	1	4	4	0	0	2	14	0	k__Bacteria;p__Firmicutes;c__Clostridia;o__Lachnospirales;f__Defluviitaleaceae;g__Defluviitaleaceae_UCG-011;s__
OTU_517	1	1	6	46	0	80	0	5	1	k__Bacteria;p__Bacteroidota;c__Bacteroidia;o__Bacteroidales;f__Prevotellaceae;g__Prevotella;s__
OTU_518	2	1	1	1	88	4	16	1	5	k__Bacteria;p__Proteobacteria;c__Gammaproteobacteria;o__Aeromonadales;f__Succinivibrionaceae
OTU_519	19	5	4	4	7	7	1	0	3	k__Bacteria;p__Firmicutes;c__Clostridia;o__Lachnospirales;f__Lachnospiraceae;g__Lachnospiraceae_NK4A136_group;s__Lachnospiraceae_bacterium_COE1
OTU_520	112	87	15	9	21	7	4	1	2	k__Bacteria;p__Firmicutes;c__Clostridia;o__Oscillospirales;f__Oscillospiraceae;g__Oscillospira;s__Oscillospira_guilliermondii
OTU_521	5	11	0	9	2	10	0	5	0	k__Bacteria;p__Spirochaetota;c__Spirochaetia;o__Spirochaetales;f__Spirochaetaceae;g__Treponema;s__Treponema_bryantii
OTU_522	3	6	3	1	1	1	6	2	1	k__Bacteria;p__Firmicutes;c__Clostridia;o__Peptostreptococcales-Tissierellales
OTU_523	0	0	0	0	5	1	1	7	4	k__Bacteria;p__Firmicutes;c__Clostridia;o__Lachnospirales;f__Lachnospiraceae;g__Acetitomaculum;s__
OTU_524	0	1	2	1	0	14	0	0	1	k__Bacteria;p__Bacteroidota;c__Bacteroidia;o__Bacteroidales;f__Rikenellaceae;g__Alistipes;s__
OTU_525	0	1	2	0	0	20	0	13	0	k__Bacteria;p__Bacteroidota;c__Bacteroidia;o__Bacteroidales;f__Rikenellaceae;g__Alistipes;s__Alistipes_shahii
OTU_526	41	39	120	69	9	15	18	91	13	k__Bacteria;p__Firmicutes;c__Clostridia;o__Christensenellales;f__Christensenellaceae;g__Christensenellaceae_R-7_group;s__
OTU_527	1	0	0	0	0	25	0	6	0	k__Bacteria;p__Firmicutes;c__Clostridia;o__Oscillospirales;f__Ruminococcaceae;g__CAG-352;s__
OTU_528	2	5	16	1	9	12	0	2	3	k__Bacteria;p__Firmicutes;c__Clostridia;o__Clostridia_UCG-014;f__;g__;s__
OTU_529	0	0	2	1	0	2	16	0	0	k__Bacteria;p__Firmicutes;c__Bacilli;o__RF39;f__;g__;s__
OTU_530	0	0	1	0	0	11	1	19	0	k__Bacteria;p__Firmicutes;c__Clostridia;o__Lachnospirales;f__Lachnospiraceae;g__Lachnospiraceae_ND3007_group;s__
OTU_531	12	5	2	12	1	3	1	0	0	k__Bacteria;p__Firmicutes;c__Clostridia;o__Oscillospirales;f__[Eubacterium]_coprostanoligenes_group;g__;s__
OTU_532	4	6	2	2	1	22	1	1	0	k__Bacteria;p__Firmicutes;c__Clostridia;o__Clostridia_UCG-014;f__;g__;s__
OTU_533	2	5	0	20	0	18	12	4	0	k__Bacteria;p__Bacteroidota;c__Bacteroidia;o__Bacteroidales;f__Muribaculaceae;g__;s__
OTU_534	7	78	8	4	5	20	4	4	8	k__Bacteria;p__Firmicutes;c__Clostridia;o__Clostridia_UCG-014;f__;g__;s__
OTU_535	0	5	2	1	5	2	0	0	0	k__Bacteria;p__Firmicutes;c__Clostridia;o__Clostridia_vadinBB60_group;f__;g__;s__
OTU_536	4	11	2	1	4	1	2	1	0	k__Bacteria
OTU_537	0	1	13	0	1	5	1	1	0	k__Bacteria
OTU_538	3	13	5	3	1	1	2	4	2	k__Bacteria;p__Proteobacteria;c__Gammaproteobacteria;o__Burkholderiales;f__Comamonadaceae
OTU_539	19	4	3	13	6	6	3	18	7	k__Bacteria;p__Firmicutes;c__Clostridia;o__Monoglobales;f__Monoglobaceae;g__Monoglobus;s__
OTU_540	0	1	1	14	1	0	3	4	0	k__Bacteria;p__Firmicutes;c__Clostridia;o__Lachnospirales;f__Lachnospiraceae;g__Acetitomaculum;s__
OTU_541	15	42	8	16	3	7	7	6	8	k__Bacteria;p__Firmicutes;c__Clostridia;o__Oscillospirales;f__Oscillospiraceae;g__NK4A214_group;s__
OTU_542	4	3	3	8	3	2	1	9	4	k__Bacteria;p__Firmicutes;c__Clostridia;o__Oscillospirales;f__Ruminococcaceae;g__Negativibacillus;s__
OTU_543	6	4	8	8	0	1	0	5	0	k__Bacteria;p__Bacteroidota;c__Bacteroidia;o__Bacteroidales;f__Prevotellaceae;g__Prevotella;s__
OTU_544	2	10	8	2	5	4	2	7	5	k__Bacteria;p__Bacteroidota;c__Bacteroidia;o__Bacteroidales;f__Muribaculaceae;g__unidentified_Muribaculaceae;s__Gram-negative_bacterium_cTPY-13
OTU_545	7	11	7	5	3	11	2	3	2	k__Bacteria;p__Firmicutes;c__Clostridia;o__Oscillospirales;f__Ruminococcaceae
OTU_546	3	0	0	1	10	0	1	1	0	k__Bacteria;p__Firmicutes;c__Clostridia;o__Oscillospirales;f__[Eubacterium]_coprostanoligenes_group;g__;s__
OTU_547	0	0	0	0	1	24	0	11	0	k__Bacteria;p__Firmicutes;c__Clostridia;o__Oscillospirales;f__Ruminococcaceae;g__Subdoligranulum;s__
OTU_548	5	2	20	1	3	0	0	0	3	k__Bacteria;p__Bacteroidota;c__Bacteroidia;o__Bacteroidales;f__Prevotellaceae
OTU_549	1	1	2	5	1	14	0	0	0	k__Bacteria;p__Cyanobacteria;c__Vampirivibrionia;o__Gastranaerophilales;f__;g__;s__
OTU_550	0	7	0	5	0	0	0	2	0	k__Bacteria;p__unidentified_Bacteria;c__Clostridia;o__Christensenellales;f__Christensenellaceae;g__;s__
OTU_551	6	17	10	2	4	11	2	13	4	k__Bacteria;p__Firmicutes;c__Clostridia;o__Peptostreptococcales-Tissierellales;f__Anaerovoracaceae;g__[Eubacterium]_nodatum_group;s__
OTU_552	0	1	1	1	0	32	0	12	1	k__Bacteria;p__Firmicutes;c__Clostridia;o__Oscillospirales;f__Butyricicoccaceae;g__Butyricicoccus;s__
OTU_553	0	0	11	0	0	0	13	4	13	k__Bacteria;p__Firmicutes;c__Clostridia;o__Lachnospirales;f__Lachnospiraceae
OTU_554	1	0	0	3	9	3	0	1	6	k__Bacteria;p__unidentified_Bacteria;c__Alphaproteobacteria;o__Rhodospirillales;f__;g__;s__
OTU_555	3	1	2	1	0	15	0	0	0	k__Bacteria;p__Firmicutes;c__Clostridia;o__unidentified_Clostridia;f__Hungateiclostridiaceae;g__UCG-012;s__
OTU_556	0	1	2	2	0	1	3	9	0	k__Bacteria;p__Firmicutes;c__Clostridia;o__Christensenellales;f__Christensenellaceae;g__Christensenellaceae_R-7_group;s__
OTU_557	0	2	0	1	1	0	9	3	0	k__Bacteria;p__Verrucomicrobiota;c__Kiritimatiellae;o__WCHB1-41;f__;g__;s__
OTU_558	0	1	2	0	4	3	4	1	10	k__Bacteria;p__Firmicutes;c__Bacilli;o__Erysipelotrichales;f__Erysipelatoclostridiaceae;g__Asteroleplasma;s__Asteroleplasma_anaerobium
OTU_559	1	5	0	0	5	5	0	0	0	k__Bacteria;p__Firmicutes;c__Clostridia;o__Oscillospirales;f__UCG-010;g__;s__
OTU_560	3	15	12	2	5	5	12	1	2	k__Bacteria;p__Firmicutes;c__Bacilli;o__RF39;f__;g__;s__
OTU_561	0	4	12	6	2	0	3	16	2	k__Bacteria;p__Firmicutes;c__Clostridia;o__Christensenellales;f__Christensenellaceae;g__Christensenellaceae_R-7_group;s__
OTU_562	0	0	0	0	0	24	0	5	0	k__Bacteria;p__Bacteroidota;c__Bacteroidia;o__Bacteroidales;f__Bacteroidaceae;g__Bacteroides;s__Bacteroides_cellulosilyticus
OTU_563	0	2	4	2	8	17	2	1	3	k__Bacteria;p__Firmicutes;c__Clostridia;o__Oscillospirales;f__[Eubacterium]_coprostanoligenes_group;g__;s__
OTU_564	3	11	0	7	0	8	4	5	1	k__Bacteria;p__Bacteroidota;c__Bacteroidia;o__Bacteroidales;f__Muribaculaceae;g__;s__
OTU_565	9	2	0	7	0	0	3	0	2	k__Bacteria;p__Firmicutes;c__Clostridia;o__Lachnospirales;f__Lachnospiraceae;g__Catonella
OTU_566	0	0	9	0	1	9	2	4	6	k__Bacteria;p__Firmicutes;c__Clostridia;o__Lachnospirales;f__Lachnospiraceae;g__Roseburia;s__
OTU_567	0	2	1	3	2	12	1	5	9	k__Bacteria;p__Cyanobacteria;c__Vampirivibrionia;o__Gastranaerophilales;f__;g__;s__
OTU_568	5	5	2	0	0	2	1	0	1	k__Bacteria;p__Firmicutes;c__Clostridia;o__Oscillospirales;f__Oscillospiraceae;g__Oscillibacter
OTU_569	1	1	7	11	4	2	3	0	2	k__Bacteria;p__Firmicutes;c__Clostridia;o__Lachnospirales;f__Lachnospiraceae
OTU_570	0	7	6	0	2	0	3	1	1	k__Bacteria;p__Firmicutes;c__Clostridia;o__Peptostreptococcales-Tissierellales;f__Anaerovoracaceae
OTU_571	11	2	2	5	1	2	0	1	0	k__Bacteria;p__Firmicutes;c__Clostridia;o__Lachnospirales;f__Lachnospiraceae
OTU_572	3	1	0	10	0	0	1	16	0	k__Bacteria;p__Bacteroidota;c__Bacteroidia;o__Bacteroidales;f__Rikenellaceae;g__Rikenellaceae_RC9_gut_group;s__
OTU_573	0	0	0	0	0	48	0	17	0	k__Bacteria;p__Bacteroidota;c__Bacteroidia;o__Bacteroidales;f__Bacteroidaceae;g__Bacteroides;s__Bacteroides_massiliensis
OTU_574	0	3	7	10	0	2	6	4	8	k__Bacteria;p__Firmicutes;c__Clostridia;o__Lachnospirales;f__Lachnospiraceae;g__Oribacterium;s__
OTU_575	5	4	2	4	0	19	1	12	1	k__Bacteria;p__Firmicutes;c__Clostridia;o__Monoglobales;f__Monoglobaceae;g__Monoglobus;s__
OTU_576	0	10	0	1	2	0	0	0	0	k__Bacteria;p__Firmicutes;c__Clostridia;o__Monoglobales;f__Monoglobaceae;g__Monoglobus;s__
OTU_577	1	0	0	0	0	3	0	0	12	k__Bacteria;p__Firmicutes;c__Clostridia;o__Lachnospirales;f__Lachnospiraceae
OTU_578	1	2	2	0	6	29	6	15	1	k__Bacteria;p__Firmicutes;c__Clostridia;o__Lachnospirales;f__Lachnospiraceae;g__[Ruminococcus]_torques_group;s__
OTU_579	11	8	0	0	1	5	0	0	1	k__Bacteria;p__Firmicutes;c__Clostridia;o__Monoglobales;f__Monoglobaceae;g__Monoglobus;s__
OTU_580	4	0	0	0	0	1	2	1	2	k__Bacteria;p__Firmicutes;c__Clostridia;o__Christensenellales;f__Christensenellaceae;g__unidentified_Christensenellaceae;s__Christensenella_sp_Marseille-P2437
OTU_581	14	27	8	9	7	3	0	1	2	k__Bacteria;p__Firmicutes;c__Clostridia;o__Oscillospirales;f__Oscillospiraceae;g__Oscillibacter
OTU_582	8	6	9	5	2	4	2	4	1	k__Bacteria;p__unidentified_Bacteria;c__Clostridia;o__Oscillospirales
OTU_583	0	6	0	9	0	2	2	3	7	k__Bacteria;p__Bacteroidota;c__Bacteroidia;o__Bacteroidales;f__Prevotellaceae;g__Prevotellaceae_UCG-001;s__
OTU_584	1	1	0	0	0	1	1	11	0	k__Bacteria;p__Firmicutes;c__Clostridia;o__Oscillospirales;f__UCG-010;g__;s__
OTU_585	48	16	4	16	29	8	7	96	10	k__Bacteria;p__Firmicutes;c__Clostridia;o__Lachnospirales;f__Lachnospiraceae;g__Lachnospiraceae_NK4A136_group
OTU_586	1	5	0	7	4	0	1	2	0	k__Bacteria;p__Firmicutes;c__Bacilli;o__Erysipelotrichales;f__Erysipelotrichaceae;g__Erysipelotrichaceae_UCG-009;s__
OTU_587	0	4	2	11	18	1	1	1	7	k__Bacteria;p__unidentified_Bacteria;c__Alphaproteobacteria;o__Rhodospirillales;f__;g__;s__
OTU_588	6	5	9	3	3	1	2	2	0	k__Bacteria;p__Desulfobacterota;c__Desulfobulbia;o__Desulfobulbales;f__Desulfobulbaceae;g__Desulfobulbus;s__
OTU_589	7	4	8	12	1	2	2	2	0	k__Bacteria;p__Firmicutes;c__Clostridia;o__Clostridia_UCG-014;f__;g__;s__
OTU_590	6	2	3	3	5	3	8	9	4	k__Bacteria;p__Firmicutes;c__Bacilli;o__Erysipelotrichales;f__Erysipelatoclostridiaceae;g__Erysipelotrichaceae_UCG-003;s__
OTU_591	1	22	0	0	0	0	0	3	0	k__Bacteria;p__Firmicutes;c__Bacilli;o__Staphylococcales;f__Staphylococcaceae;g__Jeotgalicoccus;s__Jeotgalicoccus_sp_M3T9B12
OTU_592	14	42	26	153	54	142	51	11	9	k__Bacteria;p__Spirochaetota;c__Spirochaetia;o__Spirochaetales;f__Spirochaetaceae;g__Treponema
OTU_593	2	1	1	2	0	9	0	1	1	k__Bacteria;p__Firmicutes;c__Clostridia;o__Clostridia_vadinBB60_group;f__;g__;s__
OTU_594	0	1	0	8	0	11	2	0	0	k__Bacteria;p__Bacteroidota;c__Bacteroidia;o__Bacteroidales;f__Prevotellaceae;g__Prevotellaceae_UCG-001;s__
OTU_595	3	2	13	0	1	0	0	1	3	k__Bacteria;p__Cyanobacteria;c__Vampirivibrionia;o__Gastranaerophilales;f__;g__;s__
OTU_596	11	1	8	8	5	2	1	6	4	k__Bacteria;p__unidentified_Bacteria;c__Clostridia;o__Peptococcales;f__Peptococcaceae;g__;s__
OTU_597	0	2	8	0	11	3	1	2	0	k__Bacteria;p__Firmicutes;c__Clostridia;o__Oscillospirales;f__Ruminococcaceae;g__Ruminococcus
OTU_598	4	3	3	1	11	6	7	7	1	k__Bacteria;p__unidentified_Bacteria;c__Coriobacteriia;o__Coriobacteriales;f__Eggerthellaceae;g__;s__
OTU_599	14	53	5	4	5	9	4	3	0	k__Bacteria;p__Firmicutes;c__Clostridia;o__Clostridia_UCG-014;f__;g__;s__
OTU_600	0	1	6	0	1	0	2	3	2	k__Bacteria
OTU_601	2	9	0	1	1	0	0	0	0	k__Bacteria;p__Firmicutes;c__Clostridia;o__Clostridia_vadinBB60_group;f__;g__;s__
OTU_602	1	1	0	5	0	0	0	0	6	k__Bacteria;p__Bacteroidota;c__Bacteroidia;o__Bacteroidales;f__Prevotellaceae
OTU_603	9	16	13	0	2	7	0	1	5	k__Bacteria;p__Cyanobacteria;c__Vampirivibrionia;o__Gastranaerophilales;f__;g__;s__
OTU_604	1	30	1	10	1	2	1	0	0	k__Bacteria;p__Firmicutes;c__Clostridia;o__Lachnospirales;f__Lachnospiraceae;g__Blautia;s__Lachnospiraceae_bacterium_DW59
OTU_605	0	0	0	0	0	4	0	11	0	k__Bacteria;p__Firmicutes;c__Clostridia;o__Oscillospirales;f__Ruminococcaceae;g__Subdoligranulum;s__
OTU_606	0	11	0	9	2	1	1	1	1	k__Bacteria;p__Firmicutes;c__Bacilli;o__Erysipelotrichales;f__Erysipelotrichaceae;g__Allobaculum;s__
OTU_607	1	1	19	1	1	3	0	0	2	k__Bacteria;p__Bacteroidota;c__Bacteroidia;o__Bacteroidales;f__Muribaculaceae;g__;s__
OTU_608	1	2	1	6	0	1	1	3	1	k__Bacteria;p__Bacteroidota;c__Bacteroidia;o__Bacteroidales;f__Muribaculaceae;g__;s__
OTU_609	4	3	12	2	0	0	0	3	2	k__Bacteria;p__Firmicutes;c__Clostridia;o__Clostridia_vadinBB60_group;f__;g__;s__
OTU_610	2	2	5	4	5	1	0	0	6	k__Bacteria;p__Firmicutes;c__Clostridia;o__Lachnospirales;f__Lachnospiraceae
OTU_611	2	10	0	1	0	4	2	0	1	k__Bacteria
OTU_612	0	3	1	9	0	1	1	1	1	k__Bacteria;p__Bacteroidota;c__Bacteroidia;o__Bacteroidales;f__Muribaculaceae;g__;s__
OTU_613	1	15	4	12	1	0	0	0	1	k__Bacteria;p__Firmicutes;c__Clostridia;o__Lachnospirales;f__Lachnospiraceae;g__Lachnospira;s__
OTU_614	1	4	3	4	1	1	1	2	1	k__Bacteria
OTU_615	1	2	9	2	0	1	5	1	0	k__Bacteria;p__Firmicutes;c__Clostridia;o__Lachnospirales;f__Lachnospiraceae;g__Butyrivibrio;s__
OTU_616	0	7	0	3	0	2	9	0	1	k__Bacteria;p__Firmicutes;c__Bacilli;o__Lactobacillales;f__Aerococcaceae;g__Facklamia;s__Facklamia_tabacinasalis
OTU_617	2	2	2	1	1	0	0	1	0	k__Bacteria
OTU_618	7	0	0	36	0	0	0	1	0	k__Bacteria;p__Firmicutes;c__Clostridia;o__Lachnospirales;f__Lachnospiraceae;g__A2;s__
OTU_619	3	3	0	7	0	2	1	0	0	k__Bacteria;p__Bacteroidota;c__Bacteroidia;o__Bacteroidales;f__Rikenellaceae;g__Rikenellaceae_RC9_gut_group;s__
OTU_620	1	0	0	0	0	16	0	0	4	k__Bacteria;p__Firmicutes;c__Clostridia;o__Oscillospirales;f__Ruminococcaceae;g__Ruminococcus;s__
OTU_621	3	6	14	1	1	0	5	16	4	k__Bacteria;p__Firmicutes;c__Clostridia;o__Oscillospirales;f__Oscillospiraceae;g__NK4A214_group;s__
OTU_622	8	2	5	7	1	1	0	2	1	k__Bacteria;p__Firmicutes;c__Clostridia;o__Christensenellales;f__Christensenellaceae;g__Christensenellaceae_R-7_group;s__bacterium_YE57
OTU_623	0	0	0	0	2	6	1	3	0	k__Bacteria;p__Cyanobacteria;c__Vampirivibrionia;o__Gastranaerophilales;f__;g__;s__
OTU_624	13	0	0	2	0	0	0	0	0	k__Bacteria;p__Firmicutes;c__Clostridia;o__Oscillospirales;f__Oscillospiraceae;g__Colidextribacter;s__
OTU_625	0	9	0	2	0	3	1	8	1	k__Bacteria;p__Firmicutes;c__Clostridia;o__Lachnospirales;f__Lachnospiraceae
OTU_626	0	0	3	0	0	24	0	1	2	k__Bacteria
OTU_627	26	7	7	3	3	11	2	5	10	k__Bacteria;p__Firmicutes;c__Clostridia;o__Lachnospirales;f__Lachnospiraceae;g__Tuzzerella;s__
OTU_628	14	1	1	0	0	2	0	1	0	k__Bacteria;p__Firmicutes
OTU_629	1	5	27	11	9	1	11	8	2	k__Bacteria;p__Bacteroidota;c__Bacteroidia;o__Bacteroidales;f__Muribaculaceae;g__;s__
OTU_630	0	0	0	0	1	12	0	1	0	k__Bacteria;p__Firmicutes;c__Clostridia;o__Lachnospirales;f__Lachnospiraceae;g__Syntrophococcus;s__
OTU_631	1	1	0	0	0	28	0	9	0	k__Bacteria;p__Firmicutes;c__Clostridia;o__Lachnospirales;f__Lachnospiraceae;g__[Eubacterium]_eligens_group;s__
OTU_632	12	0	1	4	0	0	0	3	0	k__Bacteria;p__Firmicutes;c__Clostridia;o__Oscillospirales;f__Ruminococcaceae;g__Ruminococcus
OTU_633	1	2	0	7	0	0	0	1	0	k__Bacteria;p__Firmicutes;c__Clostridia;o__Christensenellales;f__Christensenellaceae;g__Christensenellaceae_R-7_group;s__
OTU_634	0	0	0	0	0	4	0	23	0	k__Bacteria;p__Firmicutes;c__Clostridia;o__Lachnospirales;f__Lachnospiraceae;g__[Eubacterium]_ventriosum_group;s__
OTU_635	2	0	20	2	8	0	1	0	0	k__Bacteria;p__Bacteroidota;c__Bacteroidia;o__Bacteroidales;f__Prevotellaceae
OTU_636	0	0	2	2	7	10	4	1	0	k__Bacteria;p__Firmicutes;c__Clostridia;o__Oscillospirales;f__[Eubacterium]_coprostanoligenes_group;g__;s__
OTU_637	25	39	0	0	0	22	3	0	11	k__Bacteria;p__Bacteroidota;c__Bacteroidia;o__Bacteroidales;f__Prevotellaceae;g__Prevotella;s__
OTU_638	8	2	4	8	2	0	4	2	0	k__Bacteria;p__Firmicutes;c__Bacilli;o__RF39;f__;g__;s__
OTU_639	8	2	5	5	1	2	1	0	1	k__Bacteria;p__Firmicutes;c__Clostridia;o__Oscillospirales;f__Oscillospiraceae;g__Colidextribacter
OTU_640	1	5	0	4	0	9	2	4	2	k__Bacteria;p__Firmicutes;c__Bacilli;o__Erysipelotrichales;f__Erysipelotrichaceae;g__Solobacterium;s__
OTU_641	10	15	8	18	8	5	0	21	4	k__Bacteria;p__Firmicutes;c__Clostridia;o__Clostridia_UCG-014;f__;g__;s__
OTU_642	0	0	5	1	0	2	1	1	0	k__Bacteria;p__Firmicutes;c__Clostridia;o__Monoglobales;f__Monoglobaceae;g__Monoglobus;s__
OTU_643	1	1	0	4	2	0	5	2	0	k__Bacteria;p__Firmicutes;c__Clostridia;o__Lachnospirales;f__Lachnospiraceae;g__Shuttleworthia;s__
OTU_644	0	0	3	0	4	2	1	0	0	k__Bacteria;p__Firmicutes;c__Clostridia
OTU_645	5	4	3	16	8	2	0	3	2	k__Bacteria;p__Firmicutes;c__Clostridia;o__Oscillospirales;f__Butyricicoccaceae;g__UCG-009;s__
OTU_646	0	1	1	3	1	17	0	2	1	k__Bacteria;p__Bacteroidota;c__Bacteroidia;o__Bacteroidales;f__Bacteroidales_UCG-001;g__;s__
OTU_647	2	0	3	2	2	0	1	8	1	k__Bacteria;p__Firmicutes;c__Clostridia;o__Peptostreptococcales-Tissierellales;f__Anaerovoracaceae;g__[Eubacterium]_brachy_group;s__
OTU_648	0	22	0	5	3	0	0	0	0	k__Bacteria;p__Firmicutes;c__Clostridia;o__Oscillospirales;f__Ruminococcaceae;g__Ruminococcus
OTU_649	4	1	8	12	0	17	1	1	0	k__Bacteria;p__unidentified_Bacteria;c__Alphaproteobacteria;o__Rhodospirillales;f__;g__;s__
OTU_650	7	15	8	11	5	7	0	4	3	k__Bacteria;p__unidentified_Bacteria;c__Clostridia;o__Lachnospirales;f__Lachnospiraceae;g__;s__
OTU_651	1	1	15	1	1	0	5	0	1	k__Bacteria;p__Bacteroidota;c__Bacteroidia;o__Bacteroidales;f__Tannerellaceae;g__Parabacteroides;s__
OTU_652	4	4	0	2	0	0	1	1	1	k__Bacteria;p__Bacteroidota;c__Bacteroidia;o__Bacteroidales;f__Rs-E47_termite_group;g__;s__
OTU_653	6	7	1	16	5	1	2	7	3	k__Bacteria;p__unidentified_Bacteria;c__Bacilli;o__Erysipelotrichales;f__Erysipelotrichaceae;g__;s__
OTU_654	29	11	39	17	7	41	6	4	2	k__Bacteria;p__Firmicutes;c__Clostridia;o__Oscillospirales;f__Ruminococcaceae;g__UCG-001;s__
OTU_655	1	18	2	2	12	1	9	4	4	k__Bacteria;p__Actinobacteriota;c__Actinobacteria;o__Bifidobacteriales;f__Bifidobacteriaceae;g__Bifidobacterium;s__Bifidobacterium_animalis
OTU_656	0	4	1	0	2	0	4	0	0	k__Bacteria;p__Firmicutes;c__Bacilli;o__Erysipelotrichales;f__Erysipelatoclostridiaceae;g__UCG-004;s__
OTU_657	30	2	6	4	6	1	7	2	3	k__Bacteria;p__Bacteroidota;c__Bacteroidia;o__Bacteroidales;f__Muribaculaceae;g__;s__
OTU_658	0	0	8	0	3	0	10	0	0	k__Bacteria;p__Firmicutes;c__Clostridia;o__Clostridia_UCG-014;f__;g__;s__
OTU_659	209	58	179	660	3850	9680	109	278	82	k__Bacteria;p__Proteobacteria;c__Gammaproteobacteria;o__Aeromonadales;f__Succinivibrionaceae;g__Succinivibrio;s__
OTU_660	2	0	3	3	1	0	2	2	0	k__Bacteria;p__Actinobacteriota;c__Coriobacteriia;o__Coriobacteriales;f__Atopobiaceae;g__Atopobium;s__
OTU_661	2	7	2	14	3	5	1	0	1	k__Bacteria;p__unidentified_Bacteria;c__Alphaproteobacteria;o__Rhodospirillales;f__;g__;s__
OTU_662	3	2	0	15	0	0	0	0	0	k__Bacteria;p__Firmicutes;c__Clostridia;o__Lachnospirales;f__Lachnospiraceae;g__Lachnospiraceae_NK3A20_group;s__
OTU_663	1	6	2	8	3	9	1	0	2	k__Bacteria;p__Firmicutes;c__Clostridia;o__Oscillospirales;f__Oscillospiraceae;g__UCG-005;s__
OTU_664	0	2	0	0	1	1	13	0	0	k__Bacteria;p__Bacteroidota;c__Bacteroidia;o__Bacteroidales;f__Muribaculaceae;g__;s__
OTU_665	0	4	1	2	3	0	4	1	0	k__Bacteria;p__Firmicutes;c__Clostridia;o__Oscillospirales;f__Oscillospiraceae;g__V9D2013_group;s__
OTU_666	4	20	0	0	0	2	7	6	0	k__Bacteria;p__Actinobacteriota;c__Actinobacteria;o__Corynebacteriales;f__Corynebacteriaceae;g__Corynebacterium;s__Corynebacterium_stationis
OTU_667	1	5	0	0	2	0	0	1	0	k__Bacteria;p__Firmicutes;c__Clostridia;o__Oscillospirales;f__UCG-010;g__;s__
OTU_668	6	1	3	1	3	3	0	0	1	k__Bacteria;p__Firmicutes;c__Clostridia
OTU_669	4	2	6	12	1	16	1	10	0	k__Bacteria;p__Firmicutes;c__Clostridia;o__Oscillospirales;f__Ruminococcaceae;g__[Eubacterium]_siraeum_group;s__
OTU_670	4	0	7	1	2	0	3	6	2	k__Bacteria
OTU_671	7	1	0	0	1	1	1	1	0	k__Bacteria;p__Firmicutes;c__Clostridia;o__Lachnospirales;f__Lachnospiraceae;g__Sellimonas;s__
OTU_672	0	1	13	1	5	0	1	0	0	k__Bacteria;p__Bacteroidota;c__Bacteroidia;o__Bacteroidales;f__Prevotellaceae;g__Prevotellaceae_UCG-003;s__
OTU_673	0	1	5	2	3	2	0	4	1	k__Bacteria;p__Firmicutes;c__Clostridia;o__Lachnospirales;f__Lachnospiraceae;g__Lachnospiraceae_UCG-008;s__
OTU_674	1	5	0	5	2	4	7	1	3	k__Bacteria;p__unidentified_Bacteria;c__Bacteroidia;o__Bacteroidales;f__;g__;s__
OTU_675	4	1	1	3	0	3	3	9	3	k__Bacteria;p__Actinobacteriota;c__Coriobacteriia;o__Coriobacteriales;f__Coriobacteriaceae;g__Collinsella;s__Collinsella_provencensis
OTU_676	0	1	13	0	0	0	1	0	0	k__Bacteria;p__Bacteroidota;c__Bacteroidia;o__Bacteroidales;f__Prevotellaceae;g__Prevotella;s__
OTU_677	11	21	10	17	4	16	3	11	8	k__Bacteria;p__Firmicutes;c__Clostridia;o__unidentified_Clostridia;f__Ruminococcaceae;g__;s__
OTU_678	0	13	0	2	0	0	1	0	0	k__Bacteria;p__Firmicutes;c__Bacilli;o__RF39;f__;g__;s__
OTU_679	0	1	3	1	2	0	0	0	1	k__Bacteria
OTU_680	4	6	1	2	2	3	0	0	0	k__Bacteria;p__Firmicutes;c__Bacilli;o__RF39;f__;g__;s__
OTU_681	0	0	5	5	2	0	6	1	0	k__Bacteria;p__Bacteroidota;c__Bacteroidia;o__Bacteroidales;f__Prevotellaceae;g__Prevotella
OTU_682	2	0	12	7	3	0	6	1	0	k__Bacteria;p__Bacteroidota;c__Bacteroidia;o__Bacteroidales;f__Tannerellaceae;g__Parabacteroides
OTU_683	2	0	4	5	1	4	0	3	4	k__Bacteria;p__Firmicutes;c__Clostridia;o__Peptostreptococcales-Tissierellales;f__Anaerovoracaceae;g__Anaerovorax;s__
OTU_684	0	0	3	0	10	0	0	0	0	k__Bacteria;p__Firmicutes;c__Clostridia;o__Lachnospirales;f__Lachnospiraceae
OTU_685	0	0	0	0	0	0	0	14	0	k__Bacteria;p__Firmicutes;c__Clostridia;o__Clostridiales;f__Clostridiaceae;g__Clostridium_sensu_stricto_1;s__Clostridium_perfringens
OTU_686	0	1	0	0	0	25	1	0	0	k__Bacteria;p__Bacteroidota;c__Bacteroidia;o__Bacteroidales;f__Bacteroidaceae;g__Bacteroides;s__Bacteroides_thetaiotaomicron
OTU_687	4	4	0	1	0	0	0	0	0	k__Bacteria;p__Firmicutes;c__Clostridia;o__Clostridia_vadinBB60_group;f__;g__;s__
OTU_688	0	0	2	0	2	0	4	0	0	k__Bacteria;p__Firmicutes;c__Clostridia;o__Eubacteriales;f__Anaerofustaceae;g__Anaerofustis;s__Anaerofustis_sp_Marseille-P2832
OTU_689	0	2	2	1	3	1	3	1	0	k__Bacteria;p__Firmicutes;c__Clostridia;o__Oscillospirales;f__[Eubacterium]_coprostanoligenes_group;g__;s__
OTU_690	0	0	1	0	0	0	0	0	11	k__Bacteria;p__Cyanobacteria;c__Vampirivibrionia;o__Gastranaerophilales;f__;g__;s__
OTU_691	0	0	8	10	0	0	0	0	1	k__Bacteria;p__unidentified_Bacteria;c__Alphaproteobacteria;o__Rhodospirillales
OTU_692	2	2	7	3	3	2	2	4	1	k__Bacteria;p__Bacteroidota;c__Bacteroidia;o__Bacteroidales;f__Muribaculaceae;g__;s__
OTU_693	0	0	11	0	0	3	0	0	5	k__Bacteria
OTU_694	226	92	12	172	169	18	237	9	8	k__Bacteria;p__Bacteroidota;c__Bacteroidia;o__Bacteroidales;f__Rikenellaceae;g__Rikenellaceae_RC9_gut_group;s__
OTU_695	5	7	4	4	3	5	3	1	4	k__Bacteria;p__Firmicutes;c__Clostridia;o__Lachnospirales;f__Lachnospiraceae;g__Lachnospiraceae_UCG-006
OTU_696	8	1	1	12	0	2	12	5	1	k__Bacteria;p__Firmicutes;c__Clostridia;o__Lachnospirales;f__Lachnospiraceae
OTU_697	0	3	2	1	9	4	0	2	0	k__Bacteria;p__Firmicutes;c__Clostridia;o__Oscillospirales;f__UCG-010;g__;s__
OTU_698	1	6	0	2	0	0	0	3	0	k__Bacteria;p__Bacteroidota;c__Bacteroidia;o__Bacteroidales;f__Muribaculaceae;g__;s__
OTU_699	18	4	3	2	4	1	4	0	0	k__Bacteria;p__Firmicutes;c__Bacilli;o__RF39;f__;g__;s__
OTU_700	0	1	2	1	1	0	1	2	2	k__Bacteria;p__Firmicutes;c__Clostridia;o__Lachnospirales;f__Defluviitaleaceae;g__Defluviitaleaceae_UCG-011;s__
OTU_701	0	0	4	0	0	0	0	0	11	k__Bacteria;p__Bacteroidota;c__Bacteroidia;o__Bacteroidales;f__F082;g__;s__
OTU_702	16	5	0	8	0	0	2	1	0	k__Bacteria;p__Bacteroidota;c__Bacteroidia;o__Bacteroidales;f__Muribaculaceae;g__;s__
OTU_703	1	4	8	8	1	3	2	2	0	k__Bacteria;p__Cyanobacteria;c__Vampirivibrionia;o__Gastranaerophilales;f__;g__;s__
OTU_704	1	0	2	0	1	5	0	0	4	k__Bacteria;p__Proteobacteria;c__Gammaproteobacteria;o__Pseudomonadales;f__Moraxellaceae;g__Moraxella
OTU_705	1	0	7	4	2	0	0	0	2	k__Bacteria;p__Bacteroidota;c__Bacteroidia;o__Bacteroidales;f__Muribaculaceae;g__;s__
OTU_706	2	6	6	1	0	0	0	0	0	k__Bacteria;p__Bacteroidota;c__Bacteroidia;o__Bacteroidales;f__Rikenellaceae;g__Rikenellaceae_RC9_gut_group;s__
OTU_707	0	0	2	3	0	3	0	1	1	k__Bacteria;p__Cyanobacteria;c__Vampirivibrionia;o__Gastranaerophilales;f__;g__;s__
OTU_708	1	1	5	0	3	6	3	0	2	k__Bacteria;p__unidentified_Bacteria;c__Saccharimonadia;o__Saccharimonadales;f__Saccharimonadaceae;g__Candidatus_Saccharimonas;s__
OTU_709	1	11	0	0	0	1	1	0	0	k__Bacteria;p__Firmicutes;c__Bacilli;o__RF39;f__;g__;s__
OTU_710	1	2	1	5	0	2	1	4	1	k__Bacteria;p__Firmicutes;c__Clostridia
OTU_711	0	16	0	0	0	1	2	4	1	k__Bacteria;p__Bacteroidota;c__Bacteroidia;o__Bacteroidales;f__Rikenellaceae;g__Rikenellaceae_RC9_gut_group;s__
OTU_712	0	0	0	0	0	0	0	12	0	k__Bacteria;p__Firmicutes;c__Clostridia;o__Lachnospirales;f__Lachnospiraceae;g__Tyzzerella;s__
OTU_713	6	1	2	4	1	0	4	1	0	k__Bacteria;p__Firmicutes;c__Clostridia;o__unidentified_Clostridia;f__Ruminococcaceae;g__;s__
OTU_714	0	3	0	1	0	5	0	0	7	k__Bacteria;p__Cyanobacteria;c__Vampirivibrionia;o__Gastranaerophilales;f__;g__;s__
OTU_715	7	2	0	2	1	0	0	0	1	k__Bacteria;p__Firmicutes;c__Clostridia;o__Oscillospirales;f__Oscillospiraceae;g__Papillibacter;s__
OTU_716	2	0	7	1	1	0	2	1	1	k__Bacteria;p__Firmicutes;c__Clostridia;o__Oscillospirales;f__UCG-010;g__;s__
OTU_717	0	1	1	0	0	0	1	5	3	k__Bacteria;p__Firmicutes;c__Bacilli;o__Erysipelotrichales;f__Erysipelotrichaceae;g__Allobaculum;s__
OTU_718	2	3	1	4	0	1	3	0	6	k__Bacteria;p__Bacteroidota;c__Bacteroidia;o__Bacteroidales;f__Muribaculaceae;g__;s__
OTU_719	4	6	0	0	6	5	2	0	2	k__Bacteria;p__Firmicutes;c__Bacilli;o__RF39;f__;g__;s__
OTU_720	0	0	0	0	0	32	0	1	0	k__Bacteria;p__Bacteroidota;c__Bacteroidia;o__Bacteroidales;f__Bacteroidaceae;g__Bacteroides;s__Bacteroides_plebeius
OTU_721	5	15	9	10	8	13	217	3	43	k__Bacteria;p__Firmicutes;c__Clostridia;o__Lachnospirales;f__Lachnospiraceae
OTU_722	0	2	0	0	0	0	1	2	0	k__Bacteria;p__Firmicutes;c__Clostridia;o__Oscillospirales;f__Oscillospiraceae;g__V9D2013_group;s__
OTU_723	1	1	2	1	0	8	0	0	0	k__Bacteria;p__unidentified_Bacteria;c__Alphaproteobacteria;o__Rhodospirillales;f__;g__;s__
OTU_724	345	329	101	711	458	150	82	176	80	k__Bacteria;p__Firmicutes;c__Clostridia;o__Oscillospirales;f__Ruminococcaceae;g__Ruminococcus;s__Ruminococcus_flavefaciens
OTU_725	2	3	0	1	2	2	9	3	0	k__Bacteria;p__Firmicutes;c__Clostridia;o__Lachnospirales;f__Lachnospiraceae;g__Lachnospiraceae_UCG-010;s__
OTU_726	0	1	0	1	2	0	10	2	0	k__Bacteria;p__Firmicutes;c__Clostridia;o__Clostridia_vadinBB60_group;f__;g__;s__
OTU_727	5	7	13	7	10	13	3	3	2	k__Bacteria;p__Firmicutes;c__Clostridia;o__Lachnospirales;f__Lachnospiraceae
OTU_728	2	0	2	2	2	2	4	0	0	k__Bacteria;p__unidentified_Bacteria;c__Clostridia;o__Lachnospirales;f__Lachnospiraceae;g__;s__
OTU_729	2	8	0	0	0	1	0	0	0	k__Bacteria;p__unidentified_Bacteria;c__Clostridia;o__Oscillospirales;f__Ruminococcaceae;g__;s__
OTU_730	0	0	0	8	1	5	0	0	1	k__Bacteria;p__Firmicutes;c__Clostridia;o__Lachnospirales;f__Lachnospiraceae
OTU_731	0	0	0	0	0	0	9	0	31	k__Bacteria;p__Bacteroidota;c__Bacteroidia;o__Bacteroidales;f__Prevotellaceae;g__Prevotella;s__
OTU_732	2	1	6	1	2	0	2	1	1	k__Bacteria;p__Firmicutes;c__Clostridia;o__Oscillospirales;f__Ruminococcaceae;g__Pygmaiobacter;s__
OTU_733	0	0	4	1	1	0	0	1	0	k__Bacteria;p__Firmicutes;c__Clostridia;o__Lachnospirales;f__Lachnospiraceae
OTU_734	0	0	0	0	9	1	1	0	1	k__Bacteria;p__Firmicutes;c__Clostridia;o__Lachnospirales;f__Lachnospiraceae;g__Lachnospiraceae_NK3A20_group;s__bacterium_ND2018
OTU_735	2	1	8	0	1	1	1	0	3	k__Bacteria;p__Firmicutes;c__Clostridia;o__Oscillospirales;f__Butyricicoccaceae;g__Butyricicoccus;s__
OTU_736	4	0	0	0	0	1	0	0	0	k__Bacteria;p__Firmicutes;c__Clostridia
OTU_737	1	0	1	0	0	1	1	5	0	k__Bacteria;p__Firmicutes;c__Clostridia;o__unidentified_Clostridia;f__Ruminococcaceae;g__;s__
OTU_738	0	0	0	0	0	11	0	1	0	k__Bacteria;p__Actinobacteriota;c__Coriobacteriia;o__Coriobacteriales;f__Coriobacteriaceae;g__Collinsella;s__Collinsella_aerofaciens
OTU_739	0	2	0	0	0	6	0	0	0	k__Bacteria;p__Firmicutes;c__Clostridia;o__Lachnospirales;f__Lachnospiraceae;g__Lachnospiraceae_NK4A136_group;s__
OTU_740	9	2	2	8	8	5	3	4	3	k__Bacteria;p__Actinobacteriota;c__Coriobacteriia;o__Coriobacteriales;f__Eggerthellaceae;g__Adlercreutzia;s__
OTU_741	2	1	0	5	0	2	0	5	0	k__Bacteria;p__Firmicutes;c__Clostridia;o__Oscillospirales;f__Butyricicoccaceae;g__UCG-009;s__
OTU_742	1	0	2	2	0	0	14	0	0	k__Bacteria;p__Firmicutes;c__Negativicutes;o__Veillonellales-Selenomonadales;f__Selenomonadaceae;g__Veillonellaceae_UCG-001;s__
OTU_743	2	2	3	2	0	1	0	1	1	k__Bacteria;p__Firmicutes;c__Clostridia;o__Peptostreptococcales-Tissierellales;f__Anaerovoracaceae;g__Family_XIII_AD3011_group;s__
OTU_744	4	3	2	0	0	0	0	0	0	k__Bacteria
OTU_745	0	0	0	2	0	0	0	13	2	k__Bacteria;p__Bacteroidota;c__Bacteroidia;o__Bacteroidales;f__Rikenellaceae;g__Rikenellaceae_RC9_gut_group;s__
OTU_746	3	0	1	0	2	1	1	2	0	k__Bacteria;p__Firmicutes;c__Clostridia;o__Lachnospirales;f__Lachnospiraceae
OTU_747	3	9	1	0	2	3	0	1	0	k__Bacteria;p__Firmicutes;c__Clostridia;o__Lachnospirales;f__Lachnospiraceae;g__Lachnospiraceae_NK4A136_group;s__
OTU_748	4	2	2	2	0	0	0	0	0	k__Bacteria;p__Firmicutes;c__Clostridia;o__Lachnospirales;f__Lachnospiraceae
OTU_749	0	2	2	2	1	0	0	2	1	k__Bacteria;p__Firmicutes;c__Bacilli;o__RF39;f__;g__;s__
OTU_750	6	1	0	2	0	21	0	1	1	k__Bacteria;p__Spirochaetota;c__Spirochaetia;o__Spirochaetales;f__Spirochaetaceae;g__Treponema;s__Treponema_bryantii
OTU_751	2	1	0	5	1	1	7	0	0	k__Bacteria
OTU_752	7	5	0	0	0	0	2	3	0	k__Bacteria;p__Firmicutes;c__Clostridia;o__Christensenellales;f__Christensenellaceae
OTU_753	3	13	4	3	3	1	6	1	1	k__Bacteria;p__Firmicutes;c__Clostridia;o__Oscillospirales;f__Ruminococcaceae;g__;s__
OTU_754	1	0	1	0	1	7	0	0	0	k__Bacteria;p__Firmicutes;c__Clostridia;o__Oscillospirales;f__Oscillospiraceae;g__V9D2013_group;s__
OTU_755	1	5	4	0	0	0	0	0	0	k__Bacteria;p__Verrucomicrobiota;c__Kiritimatiellae;o__WCHB1-41;f__;g__;s__
OTU_756	1	2	0	3	3	0	1	1	0	k__Bacteria;p__unidentified_Bacteria;c__Clostridia;o__Peptococcales;f__Peptococcaceae;g__;s__
OTU_757	1	6	1	0	1	7	17	3	1	k__Bacteria;p__Firmicutes;c__Clostridia;o__Clostridia_vadinBB60_group;f__;g__;s__
OTU_758	1	3	0	2	2	1	1	1	0	k__Bacteria;p__unidentified_Bacteria;c__Clostridia;o__Lachnospirales;f__Lachnospiraceae;g__;s__
OTU_759	1	0	1	6	0	0	0	0	1	k__Bacteria;p__Spirochaetota;c__Spirochaetia;o__Spirochaetales;f__Spirochaetaceae;g__Treponema;s__
OTU_760	1	0	2	0	0	1	37	0	0	k__Bacteria;p__Firmicutes;c__Clostridia;o__Lachnospirales;f__Lachnospiraceae;g__Lachnospiraceae_XPB1014_group;s__
OTU_761	14	5	3	29	10	4	3	21	2	k__Bacteria;p__Firmicutes;c__Clostridia;o__Clostridia_UCG-014;f__;g__;s__
OTU_762	2	6	1	1	1	0	0	0	0	k__Bacteria;p__Firmicutes;c__Clostridia;o__Lachnospirales;f__Lachnospiraceae;g__[Eubacterium]_hallii_group;s__
OTU_763	1	2	10	1	1	10	0	0	2	k__Bacteria;p__unidentified_Bacteria;c__Saccharimonadia;o__Saccharimonadales;f__Saccharimonadaceae;g__Candidatus_Saccharimonas;s__
OTU_764	1	1	8	3	0	0	0	0	1	k__Bacteria;p__unidentified_Bacteria;c__Clostridia;o__Oscillospirales;f__Ruminococcaceae;g__;s__
OTU_765	6	4	15	3	4	0	17	8	3	k__Bacteria;p__Firmicutes;c__Clostridia;o__Christensenellales;f__Christensenellaceae;g__Christensenellaceae_R-7_group;s__
OTU_766	0	0	0	0	6	0	0	3	0	k__Bacteria;p__Bacteroidota;c__Bacteroidia;o__Bacteroidales;f__F082;g__unidentified_F082;s__Bacteroidales_bacterium_Bact_22
OTU_767	0	0	0	0	0	0	13	1	0	k__Bacteria;p__Firmicutes;c__Bacilli;o__Lactobacillales;f__Carnobacteriaceae;g__Atopostipes;s__
OTU_768	0	0	0	0	0	7	0	11	0	k__Bacteria;p__Bacteroidota;c__Bacteroidia;o__Bacteroidales;f__Tannerellaceae;g__Parabacteroides;s__Parabacteroides_merdae
OTU_769	0	1	1	0	7	3	1	0	0	k__Bacteria;p__Firmicutes;c__Clostridia;o__Lachnospirales;f__Lachnospiraceae
OTU_770	29	21	24	17	23	55	27	14	15	k__Bacteria;p__Firmicutes;c__Clostridia;o__Oscillospirales;f__Oscillospiraceae;g__UCG-002;s__
OTU_771	0	0	0	1	6	0	0	3	2	k__Bacteria;p__Bacteroidota;c__Bacteroidia;o__Bacteroidales;f__Rikenellaceae;g__Rikenellaceae_RC9_gut_group;s__
OTU_772	0	2	1	0	0	0	0	10	0	k__Bacteria;p__Firmicutes;c__Clostridia;o__Peptostreptococcales-Tissierellales;f__Anaerovoracaceae;g__[Eubacterium]_nodatum_group;s__bacterium_XBB3003
OTU_773	0	0	1	5	1	2	4	0	0	k__Bacteria
OTU_774	0	4	2	0	0	0	0	0	0	k__Bacteria;p__Firmicutes;c__Clostridia;o__Oscillospirales;f__Ruminococcaceae;g__Ruminococcus
OTU_775	1	11	2	13	6	3	0	0	4	k__Bacteria;p__Bacteroidota;c__Bacteroidia;o__Bacteroidales;f__Prevotellaceae;g__Prevotella;s__
OTU_776	2	0	0	11	2	1	0	0	0	k__Bacteria;p__Firmicutes;c__Clostridia;o__Lachnospirales;f__Lachnospiraceae
OTU_777	4	2	1	0	4	22	1	0	0	k__Bacteria;p__Firmicutes;c__Clostridia;o__Clostridia_UCG-014;f__;g__;s__
OTU_778	2	4	0	3	0	2	0	0	0	k__Bacteria;p__Verrucomicrobiota;c__Kiritimatiellae;o__WCHB1-41;f__;g__;s__
OTU_779	0	1	2	7	2	0	0	1	0	k__Bacteria;p__Firmicutes;c__Clostridia;o__Clostridia_UCG-014;f__;g__;s__
OTU_780	5	0	0	1	0	0	2	0	2	k__Bacteria;p__Verrucomicrobiota;c__Kiritimatiellae;o__WCHB1-41;f__;g__;s__
OTU_781	2	0	0	6	0	2	1	0	0	k__Bacteria;p__Firmicutes;c__Clostridia;o__Lachnospirales;f__Lachnospiraceae
OTU_782	0	0	2	1	0	0	0	0	7	k__Bacteria;p__Bacteroidota;c__Bacteroidia;o__Bacteroidales;f__Rikenellaceae;g__U29-B03;s__
OTU_783	5	3	4	6	1	0	3	0	3	k__Bacteria;p__Firmicutes;c__Clostridia;o__Peptostreptococcales-Tissierellales;f__Anaerovoracaceae;g__Family_XIII_AD3011_group;s__
OTU_784	6	1	0	0	5	0	2	1	2	k__Bacteria;p__Proteobacteria;c__Alphaproteobacteria;o__Rhizobiales;f__Rhizobiaceae;g__Ensifer;s__Ensifer_adhaerens
OTU_785	1	5	4	2	3	6	0	2	3	k__Bacteria;p__Firmicutes;c__Clostridia;o__Lachnospirales;f__Lachnospiraceae;g__[Ruminococcus]_gauvreauii_group;s__
OTU_786	0	0	3	0	2	0	0	1	0	k__Bacteria;p__Firmicutes;c__Clostridia;o__Lachnospirales;f__Lachnospiraceae;g__Lachnospiraceae_ND3007_group;s__
OTU_787	2	6	0	2	3	1	1	1	0	k__Bacteria;p__Firmicutes;c__Clostridia;o__Lachnospirales;f__Lachnospiraceae;g__Lachnospiraceae_FCS020_group;s__
OTU_788	1	2	2	2	1	1	3	1	0	k__Bacteria;p__Proteobacteria;c__Gammaproteobacteria;o__Enterobacterales;f__Enterobacteriaceae;g__Cronobacter;s__
OTU_789	0	4	0	4	0	0	0	0	0	k__Bacteria;p__Bacteroidota;c__Bacteroidia;o__Bacteroidales;f__Rikenellaceae;g__Rikenellaceae_RC9_gut_group;s__
OTU_790	1	1	0	1	0	0	1	3	1	k__Bacteria;p__Firmicutes;c__Negativicutes;o__Veillonellales-Selenomonadales;f__Veillonellaceae;g__Megasphaera;s__Megasphaera_hexanoica
OTU_791	2	8	1	2	0	0	0	0	0	k__Bacteria;p__Firmicutes;c__Clostridia;o__Oscillospirales;f__Oscillospiraceae;g__Papillibacter;s__
OTU_792	0	0	3	0	2	0	0	0	0	k__Bacteria;p__Proteobacteria;c__Gammaproteobacteria;o__Aeromonadales;f__Succinivibrionaceae;g__Succinivibrio;s__Succinivibrio_dextrinosolvens
OTU_793	0	0	2	0	2	2	1	0	1	k__Bacteria;p__Proteobacteria;c__Gammaproteobacteria;o__Aeromonadales;f__Succinivibrionaceae;g__Succinatimonas;s__
OTU_794	0	2	1	9	1	0	0	0	0	k__Bacteria;p__Bacteroidota;c__Bacteroidia;o__Bacteroidales;f__Prevotellaceae;g__Prevotellaceae_UCG-001;s__
OTU_795	2	3	5	3	1	1	0	0	0	k__Bacteria;p__unidentified_Bacteria;c__Clostridia;o__Oscillospirales;f__Ruminococcaceae;g__;s__
OTU_796	3	13	12	16	1	7	1	2	6	k__Bacteria
OTU_797	1	4	0	5	1	0	0	0	0	k__Bacteria;p__Bacteroidota;c__Bacteroidia;o__Bacteroidales;f__Prevotellaceae;g__Prevotella;s__
OTU_798	0	0	1	0	0	4	0	1	0	k__Bacteria;p__Firmicutes;c__Clostridia;o__Oscillospirales;f__Ruminococcaceae
OTU_799	1	0	1	0	0	1	0	3	0	k__Bacteria;p__Firmicutes;c__Clostridia;o__Lachnospirales;f__Lachnospiraceae;g__Roseburia;s__
OTU_800	1	3	7	2	3	6	7	8	0	k__Bacteria;p__Firmicutes;c__Clostridia;o__Lachnospirales;f__Lachnospiraceae;g__[Eubacterium]_ventriosum_group;s__
OTU_801	0	0	3	4	0	1	0	2	0	k__Bacteria;p__Firmicutes;c__Clostridia;o__Oscillospirales;f__Oscillospiraceae
OTU_802	5	4	0	1	1	3	0	0	7	k__Bacteria;p__Firmicutes;c__Clostridia;o__Clostridia_vadinBB60_group;f__;g__;s__
OTU_803	1	4	0	3	1	0	1	1	0	k__Bacteria;p__Firmicutes;c__Clostridia;o__Peptostreptococcales-Tissierellales;f__Anaerovoracaceae;g__Mogibacterium;s__
OTU_804	3	4	0	5	2	10	4	12	1	k__Bacteria;p__Firmicutes;c__Clostridia;o__Lachnospirales;f__Lachnospiraceae
OTU_805	2	3	1	0	0	0	0	0	0	k__Bacteria
OTU_806	4	4	2	3	0	1	0	2	1	k__Bacteria;p__Firmicutes;c__Clostridia;o__Oscillospirales;f__Butyricicoccaceae;g__UCG-009;s__
OTU_807	3	0	3	0	2	3	1	3	0	k__Bacteria
OTU_808	2	0	5	0	0	0	0	3	7	k__Bacteria;p__Spirochaetota;c__Spirochaetia;o__Spirochaetales;f__Spirochaetaceae;g__Sphaerochaeta;s__
OTU_809	2	2	0	0	1	0	1	2	1	k__Bacteria;p__unidentified_Bacteria;c__Clostridia;o__Oscillospirales;f__Ruminococcaceae;g__;s__
OTU_810	0	1	2	0	1	0	0	2	0	k__Bacteria;p__unidentified_Bacteria;c__Clostridia;o__Oscillospirales;f__Ruminococcaceae;g__;s__
OTU_811	0	0	1	0	0	4	0	0	2	k__Bacteria;p__Firmicutes;c__Clostridia;o__Lachnospirales;f__Lachnospiraceae
OTU_812	0	1	0	0	1	2	0	7	6	k__Bacteria;p__Firmicutes;c__Clostridia;o__Lachnospirales;f__Lachnospiraceae;g__Lachnospiraceae_UCG-004;s__
OTU_813	1	1	1	0	0	2	2	1	0	k__Bacteria;p__Firmicutes;c__Clostridia;o__Oscillospirales;f__UCG-010;g__;s__
OTU_814	2	0	2	0	0	3	0	0	0	k__Bacteria;p__Bacteroidota;c__Bacteroidia;o__Bacteroidales;f__Prevotellaceae;g__Prevotella;s__Prevotella_ruminicola
OTU_815	0	10	4	6	13	2	1	8	0	k__Bacteria;p__Firmicutes;c__Bacilli;o__RF39;f__;g__;s__
OTU_816	5	6	3	19	3	6	0	4	5	k__Bacteria;p__Firmicutes;c__Clostridia;o__Oscillospirales;f__Oscillospiraceae;g__NK4A214_group;s__
OTU_817	2	0	17	1	1	0	1	0	0	k__Bacteria;p__Firmicutes;c__Negativicutes;o__Veillonellales-Selenomonadales;f__Selenomonadaceae;g__Quinella;s__
OTU_818	0	0	1	0	3	1	0	0	0	k__Bacteria;p__Firmicutes;c__Clostridia;o__Clostridia_vadinBB60_group;f__;g__;s__
OTU_819	0	5	0	10	0	0	0	0	0	k__Bacteria;p__Bacteroidota;c__Bacteroidia;o__Bacteroidales;f__Muribaculaceae;g__;s__
OTU_820	3	0	0	0	0	0	1	0	0	k__Bacteria;p__Firmicutes;c__Clostridia;o__Clostridia_vadinBB60_group;f__;g__;s__
OTU_821	2	0	2	0	0	0	0	1	0	k__Bacteria;p__Firmicutes;c__Clostridia;o__Oscillospirales;f__Oscillospiraceae;g__Oscillibacter
OTU_822	0	1	1	0	0	10	0	1	0	k__Bacteria;p__Firmicutes;c__Clostridia;o__Clostridia_vadinBB60_group;f__;g__;s__
OTU_823	2	0	5	3	1	1	0	3	1	k__Bacteria;p__Firmicutes;c__Clostridia;o__Oscillospirales;f__Oscillospiraceae;g__Colidextribacter;s__
OTU_824	4	5	6	11	3	7	1	7	1	k__Bacteria;p__Firmicutes;c__Clostridia;o__Lachnospirales;f__Lachnospiraceae
OTU_825	2	8	2	1	0	1	0	0	2	k__Bacteria;p__Firmicutes;c__Clostridia;o__Clostridia_vadinBB60_group;f__;g__;s__
OTU_826	2	0	0	1	2	0	0	0	0	k__Bacteria;p__Firmicutes;c__Clostridia
OTU_827	0	3	1	3	0	0	1	2	1	k__Bacteria
OTU_828	4	0	1	8	1	2	0	10	0	k__Bacteria;p__Bacteroidota;c__Bacteroidia;o__Bacteroidales;f__Muribaculaceae;g__;s__
OTU_829	0	0	1	3	1	0	7	0	0	k__Bacteria;p__Firmicutes;c__Clostridia;o__Oscillospirales;f__Ruminococcaceae
OTU_830	0	2	0	2	3	4	2	0	1	k__Bacteria;p__Firmicutes;c__Bacilli;o__Lactobacillales;f__Streptococcaceae;g__Streptococcus;s__Streptococcus_hyointestinalis
OTU_831	33	5	24	46	55	8	24	34	26	k__Bacteria;p__Firmicutes;c__Clostridia;o__Oscillospirales;f__Oscillospiraceae;g__UCG-005;s__
OTU_832	1	0	0	1	0	0	0	2	0	k__Bacteria;p__Firmicutes;c__Clostridia;o__Lachnospirales;f__Defluviitaleaceae;g__Defluviitaleaceae_UCG-011;s__
OTU_833	4	1	5	0	2	0	3	0	4	k__Bacteria;p__Firmicutes;c__Clostridia;o__Peptostreptococcales-Tissierellales;f__Anaerovoracaceae;g__[Eubacterium]_nodatum_group;s__
OTU_834	0	0	0	3	3	3	0	0	0	k__Bacteria;p__unidentified_Bacteria;c__Alphaproteobacteria;o__Rhodospirillales;f__;g__;s__
OTU_835	1	4	3	1	2	4	1	1	0	k__Bacteria;p__Firmicutes;c__Bacilli;o__RF39;f__;g__;s__
OTU_836	6	4	1	4	1	0	0	0	2	k__Bacteria;p__Bacteroidota;c__Bacteroidia;o__Bacteroidales;f__Muribaculaceae
OTU_837	0	0	3	0	0	0	0	28	0	k__Bacteria;p__Firmicutes;c__Clostridia;o__Monoglobales;f__Monoglobaceae;g__Monoglobus;s__
OTU_838	0	1	0	0	1	4	0	0	0	k__Bacteria;p__unidentified_Bacteria;c__Clostridia;o__Oscillospirales;f__Ruminococcaceae;g__;s__
OTU_839	1	5	0	2	0	1	0	0	0	k__Bacteria;p__Firmicutes;c__Bacilli;o__Erysipelotrichales;f__Erysipelotrichaceae
OTU_840	0	2	6	1	3	0	1	1	1	k__Bacteria;p__Firmicutes;c__Clostridia;o__Lachnospirales;f__Lachnospiraceae;g__Lachnospiraceae_NK4A136_group;s__
OTU_841	1	2	1	1	1	2	0	0	2	k__Bacteria;p__unidentified_Bacteria;c__Clostridia;o__Lachnospirales;f__Lachnospiraceae;g__;s__
OTU_842	0	2	4	0	0	0	0	0	0	k__Bacteria;p__Firmicutes;c__Clostridia;o__Oscillospirales;f__[Eubacterium]_coprostanoligenes_group;g__;s__
OTU_843	13	16	3	2	1	1	1	3	4	k__Bacteria;p__Firmicutes;c__Clostridia;o__Christensenellales;f__Christensenellaceae;g__Christensenellaceae_R-7_group;s__
OTU_844	1	0	0	0	0	15	0	1	0	k__Bacteria;p__Bacteroidota;c__Bacteroidia;o__Bacteroidales;f__Barnesiellaceae;g__Barnesiella;s__
OTU_845	0	1	3	3	0	0	0	0	0	k__Bacteria;p__Firmicutes;c__Clostridia;o__Oscillospirales;f__Oscillospiraceae;g__UCG-005;s__
OTU_846	0	1	0	2	2	0	0	2	0	k__Bacteria;p__Firmicutes;c__Bacilli;o__Erysipelotrichales;f__Erysipelotrichaceae;g__[Anaerorhabdus]_furcosa_group;s__
OTU_847	2	4	5	1	0	1	0	14	0	k__Bacteria;p__Firmicutes;c__Clostridia;o__Oscillospirales;f__Ruminococcaceae;g__Ruminococcus
OTU_848	0	1	0	1	0	3	1	0	1	k__Bacteria;p__Firmicutes;c__Clostridia;o__Lachnospirales;f__Lachnospiraceae;g__Lachnospiraceae_NK3A20_group;s__
OTU_849	0	0	2	0	1	2	2	2	0	k__Bacteria;p__Proteobacteria;c__Gammaproteobacteria;o__Aeromonadales;f__Succinivibrionaceae;g__Succinivibrio;s__Succinivibrio_dextrinosolvens
OTU_850	2	0	5	5	3	0	2	3	0	k__Bacteria;p__Firmicutes;c__Bacilli;o__RF39;f__;g__;s__
OTU_851	0	0	0	0	0	0	22	0	0	k__Bacteria;p__Bacteroidota;c__Bacteroidia;o__Bacteroidales;f__Prevotellaceae;g__Prevotella;s__
OTU_852	0	10	0	2	0	2	0	3	4	k__Bacteria;p__Bacteroidota;c__Bacteroidia;o__Bacteroidales;f__Muribaculaceae;g__;s__
OTU_853	0	0	2	6	0	0	0	0	0	k__Bacteria;p__Firmicutes;c__Clostridia;o__Christensenellales;f__Christensenellaceae;g__Christensenellaceae_R-7_group;s__Christensenella_sp_Marseille-P3954
OTU_854	0	0	0	5	1	0	0	1	1	k__Bacteria;p__unidentified_Bacteria;c__Alphaproteobacteria;o__Rhodospirillales;f__;g__;s__
OTU_855	2	3	3	0	2	3	1	1	0	k__Bacteria;p__Firmicutes;c__Clostridia;o__Peptostreptococcales-Tissierellales;f__Anaerovoracaceae;g__Anaerovorax;s__
OTU_856	3	2	1	3	2	0	4	1	1	k__Bacteria;p__Firmicutes;c__Clostridia;o__Lachnospirales;f__Lachnospiraceae;g__Acetitomaculum;s__
OTU_857	0	1	0	0	1	25	0	1	0	k__Bacteria;p__Bacteroidota;c__Bacteroidia;o__Bacteroidales;f__Rikenellaceae;g__Alistipes;s__
OTU_858	0	5	3	2	0	0	3	0	1	k__Bacteria;p__Firmicutes;c__Bacilli;o__RF39;f__;g__;s__
OTU_859	0	0	0	0	0	0	0	12	0	k__Bacteria;p__Firmicutes;c__Bacilli;o__Erysipelotrichales;f__Erysipelatoclostridiaceae;g__Erysipelatoclostridium;s__Erysipelatoclostridium_ramosum
OTU_860	0	1	0	1	0	1	1	5	1	k__Bacteria;p__Bacteroidota;c__Bacteroidia;o__Bacteroidales;f__Rikenellaceae;g__Rikenellaceae_RC9_gut_group;s__
OTU_861	0	0	0	0	0	2	0	0	7	k__Bacteria
OTU_862	0	0	3	1	0	0	13	0	0	k__Bacteria;p__Bacteroidota;c__Bacteroidia;o__Bacteroidales;f__Prevotellaceae;g__Prevotella;s__
OTU_863	0	3	1	1	0	1	1	1	0	k__Bacteria;p__Firmicutes;c__Clostridia;o__Christensenellales;f__Christensenellaceae;g__Christensenellaceae_R-7_group;s__iron-reducing_bacterium_enrichment_culture_clone_HN70
OTU_864	0	0	2	1	2	0	0	0	6	k__Bacteria;p__Bacteroidota;c__Bacteroidia;o__Bacteroidales;f__Bacteroidaceae;g__Bacteroides;s__
OTU_865	1	0	0	0	0	1	0	1	12	k__Bacteria;p__Bacteroidota;c__Bacteroidia;o__Bacteroidales;f__Muribaculaceae;g__;s__
OTU_866	0	3	2	4	3	12	3	5	2	k__Bacteria;p__Firmicutes;c__Clostridia;o__Lachnospirales;f__Lachnospiraceae;g__Blautia
OTU_867	0	0	2	0	2	0	0	3	4	k__Bacteria;p__Firmicutes;c__Bacilli;o__Erysipelotrichales;f__Erysipelatoclostridiaceae;g__Erysipelatoclostridium;s__
OTU_868	2	0	0	0	0	4	0	1	0	k__Bacteria;p__Firmicutes;c__Clostridia;o__Oscillospirales;f__Ruminococcaceae
OTU_869	0	6	2	2	4	3	8	4	2	k__Bacteria;p__Bacteroidota;c__Bacteroidia;o__Bacteroidales;f__Prevotellaceae;g__Prevotellaceae_UCG-003;s__
OTU_870	0	2	0	8	3	0	0	0	0	k__Bacteria;p__Bacteroidota;c__Bacteroidia;o__Bacteroidales;f__Muribaculaceae;g__;s__
OTU_871	1	0	0	7	2	0	0	2	0	k__Bacteria;p__Proteobacteria;c__Gammaproteobacteria;o__Pasteurellales;f__Pasteurellaceae;g__Rodentibacter;s__Pasteurellaceae_bacterium
OTU_872	0	1	0	2	2	1	0	0	16	k__Bacteria;p__Bacteroidota;c__Bacteroidia;o__Bacteroidales;f__Prevotellaceae;g__Prevotella
OTU_873	2	0	0	4	0	1	2	0	1	k__Bacteria;p__Bacteroidota;c__Bacteroidia;o__Bacteroidales;f__Muribaculaceae;g__;s__
OTU_874	0	0	1	1	0	0	0	4	0	k__Bacteria;p__Firmicutes;c__Clostridia;o__Lachnospirales;f__Lachnospiraceae;g__Coprococcus;s__
OTU_875	7	4	2	3	0	0	0	4	0	k__Bacteria
OTU_876	0	1	0	1	1	2	4	0	0	k__Bacteria;p__Firmicutes;c__Clostridia;o__Oscillospirales;f__Ruminococcaceae;g__Ruminococcus;s__
OTU_877	5	0	0	1	0	0	0	0	0	k__Bacteria;p__Campilobacterota;c__Campylobacteria;o__Campylobacterales;f__Helicobacteraceae;g__Helicobacter
OTU_878	7	10	1	2	2	0	0	1	2	k__Bacteria;p__Firmicutes;c__Clostridia;o__Oscillospirales;f__[Eubacterium]_coprostanoligenes_group;g__;s__
OTU_879	432	454	395	119	497	570	120	641	153	k__Bacteria;p__Firmicutes;c__Clostridia;o__Oscillospirales;f__Oscillospiraceae;g__UCG-002;s__
OTU_880	1	8	0	0	0	1	1	1	0	k__Bacteria;p__Firmicutes;c__Bacilli;o__RF39;f__;g__;s__
OTU_881	21	34	47	43	26	34	26	55	21	k__Bacteria;p__Firmicutes;c__Clostridia;o__Lachnospirales;f__Lachnospiraceae;g__Lachnoclostridium
OTU_882	0	8	4	1	2	1	0	0	0	k__Bacteria;p__Bacteroidota;c__Bacteroidia;o__Bacteroidales;f__Muribaculaceae;g__;s__
OTU_883	0	0	2	0	0	7	1	2	6	k__Bacteria;p__unidentified_Bacteria;c__Negativicutes;o__Veillonellales-Selenomonadales;f__Selenomonadaceae;g__;s__
OTU_884	0	1	0	0	0	0	1	1	1	k__Bacteria
OTU_885	0	0	3	0	0	1	1	1	0	k__Bacteria;p__Firmicutes;c__Clostridia;o__Clostridia_vadinBB60_group;f__;g__;s__
OTU_886	0	2	1	0	0	0	0	1	1	k__Bacteria;p__Firmicutes;c__Clostridia;o__Lachnospirales;f__Lachnospiraceae
OTU_887	0	0	0	0	25	0	1	0	0	k__Bacteria
OTU_888	15	29	0	0	0	0	0	0	1	k__Bacteria;p__Bacteroidota;c__Bacteroidia;o__Bacteroidales;f__Rikenellaceae;g__Rikenellaceae_RC9_gut_group;s__
OTU_889	8	1	2	0	0	0	0	5	0	k__Bacteria;p__Bacteroidota;c__Bacteroidia;o__Bacteroidales;f__Prevotellaceae;g__Prevotellaceae_NK3B31_group;s__
OTU_890	4	0	0	1	1	3	2	3	0	k__Bacteria;p__Firmicutes;c__Clostridia;o__Peptostreptococcales-Tissierellales;f__Anaerovoracaceae;g__Anaerovorax;s__
OTU_891	1	1	3	3	0	0	0	1	0	k__Bacteria;p__Firmicutes;c__Clostridia;o__Lachnospirales;f__Lachnospiraceae;g__Lachnospiraceae_UCG-006;s__
OTU_892	2	0	2	9	7	0	1	2	0	k__Bacteria;p__Bacteroidota;c__Bacteroidia;o__Bacteroidales;f__Muribaculaceae;g__;s__
OTU_893	1	0	2	0	1	5	2	3	4	k__Bacteria;p__Proteobacteria;c__Gammaproteobacteria;o__Pasteurellales;f__Pasteurellaceae;g__Bibersteinia;s__
OTU_894	0	4	1	0	0	0	0	0	0	k__Bacteria;p__Firmicutes;c__Bacilli;o__RF39;f__;g__;s__
OTU_895	0	6	0	2	0	1	0	1	0	k__Bacteria;p__Firmicutes;c__Bacilli;o__RF39;f__;g__;s__
OTU_896	13	17	1	0	0	0	0	0	0	k__Bacteria;p__Bacteroidota;c__Bacteroidia;o__Bacteroidales;f__Prevotellaceae;g__Prevotella;s__
OTU_897	21	16	14	7	2	5	4	5	8	k__Bacteria;p__Firmicutes;c__Clostridia;o__Oscillospirales;f__Oscillospiraceae
OTU_898	0	1	1	1	3	0	0	2	4	k__Bacteria;p__Actinobacteriota;c__Coriobacteriia;o__Coriobacteriales;f__Atopobiaceae;g__Olsenella
OTU_899	20	20	17	15	5	15	0	9	17	k__Bacteria
OTU_900	1	1	1	0	2	1	2	0	1	k__Bacteria;p__Firmicutes;c__Clostridia;o__Peptostreptococcales-Tissierellales
OTU_901	64	0	4	1	2	0	0	1	0	k__Bacteria;p__Bacteroidota;c__Bacteroidia;o__Bacteroidales;f__Prevotellaceae;g__Prevotella
OTU_902	1	0	4	0	0	0	0	0	0	k__Bacteria;p__unidentified_Bacteria;c__unidentified_Bacteria;o__unidentified_Bacteria;f__unidentified_Bacteria;g__unidentified_Bacteria
OTU_903	0	2	1	0	0	4	0	1	0	k__Bacteria;p__Firmicutes;c__Clostridia;o__Clostridia_vadinBB60_group;f__;g__;s__
OTU_904	1	1	0	1	0	1	0	2	0	k__Bacteria;p__Firmicutes;c__Clostridia;o__Oscillospirales;f__UCG-010;g__;s__
OTU_905	0	0	1	0	0	0	0	1	1	k__Bacteria;p__Firmicutes;c__Clostridia;o__Lachnospirales;f__Lachnospiraceae
OTU_906	0	2	2	5	0	1	0	0	0	k__Bacteria;p__Bacteroidota;c__Bacteroidia;o__Bacteroidales;f__Bacteroidaceae;g__Bacteroides
OTU_907	3	0	4	1	0	0	0	1	0	k__Bacteria;p__Firmicutes;c__Clostridia;o__Oscillospirales;f__UCG-010;g__;s__
OTU_908	5	0	0	2	0	0	0	0	0	k__Bacteria;p__Bacteroidota;c__Bacteroidia;o__Bacteroidales;f__Rikenellaceae;g__Alistipes;s__
OTU_909	0	7	2	5	1	3	4	1	0	k__Bacteria;p__Firmicutes;c__Bacilli;o__RF39;f__;g__;s__
OTU_910	15	6	14	14	8	10	5	3	7	k__Bacteria;p__Firmicutes;c__Clostridia;o__Clostridia_UCG-014;f__;g__;s__
OTU_911	0	1	0	0	0	0	1	2	0	k__Bacteria;p__unidentified_Bacteria;c__Clostridia;o__Christensenellales;f__Christensenellaceae;g__;s__
OTU_912	3	4	2	0	1	1	1	2	2	k__Bacteria;p__Firmicutes;c__Clostridia;o__Clostridia_UCG-014;f__;g__;s__
OTU_913	2	1	5	1	2	1	0	0	2	k__Bacteria
OTU_914	0	0	0	0	0	0	0	0	5	k__Bacteria;p__Bacteroidota;c__Bacteroidia;o__Bacteroidales;f__Rikenellaceae;g__Rikenellaceae_RC9_gut_group;s__
OTU_915	1	0	0	2	0	2	0	0	1	k__Bacteria;p__Firmicutes;c__Clostridia;o__Christensenellales;f__Christensenellaceae;g__Christensenellaceae_R-7_group
OTU_916	0	0	0	0	4	0	0	1	1	k__Bacteria;p__Firmicutes;c__Clostridia;o__Lachnospirales;f__Lachnospiraceae;g__Lachnospiraceae_NK3A20_group;s__
OTU_917	0	2	0	1	1	0	0	0	0	k__Bacteria;p__unidentified_Bacteria;c__Alphaproteobacteria;o__Rhodospirillales;f__;g__;s__
OTU_918	3	3	0	2	0	1	0	2	0	k__Bacteria;p__Firmicutes;c__unidentified_Firmicutes;o__DTU014;f__;g__;s__
OTU_919	2	0	0	1	1	1	1	2	1	k__Bacteria;p__Firmicutes;c__Clostridia;o__Peptostreptococcales-Tissierellales;f__Anaerovoracaceae;g__Family_XIII_AD3011_group;s__
OTU_920	0	1	2	2	7	0	0	0	0	k__Bacteria;p__Bacteroidota;c__Bacteroidia;o__Bacteroidales;f__Muribaculaceae;g__;s__
OTU_921	9	27	10	8	16	5	13	4	4	k__Bacteria;p__Firmicutes;c__Clostridia;o__Clostridia_UCG-014;f__;g__;s__
OTU_922	0	4	3	0	0	0	0	0	0	k__Bacteria;p__Bacteroidota;c__Bacteroidia;o__Bacteroidales;f__Prevotellaceae
OTU_923	0	6	1	0	0	0	2	1	3	k__Bacteria;p__Bacteroidota;c__Bacteroidia;o__Bacteroidales;f__Muribaculaceae;g__;s__
OTU_924	4	7	12	10	3	4	3	14	83	k__Bacteria;p__Firmicutes;c__Clostridia;o__Lachnospirales;f__Lachnospiraceae
OTU_925	0	1	0	1	0	0	3	0	0	k__Bacteria;p__Firmicutes;c__Bacilli;o__RF39
OTU_926	0	0	0	1	4	0	9	4	0	k__Bacteria;p__Bacteroidota;c__Bacteroidia;o__Bacteroidales;f__F082
OTU_927	0	0	0	0	0	0	13	0	0	k__Bacteria;p__Bacteroidota;c__Bacteroidia;o__Bacteroidales;f__Prevotellaceae;g__Prevotella;s__
OTU_928	1	1	0	1	1	0	0	1	2	k__Bacteria;p__Firmicutes;c__Clostridia
OTU_929	0	0	0	0	0	3	3	2	0	k__Bacteria;p__Verrucomicrobiota;c__Kiritimatiellae;o__WCHB1-41;f__;g__;s__
OTU_930	2	0	1	0	1	0	1	0	9	k__Bacteria;p__Bacteroidota;c__Bacteroidia;o__Bacteroidales;f__Muribaculaceae;g__;s__
OTU_931	1	0	5	3	3	1	1	0	1	k__Bacteria;p__Firmicutes;c__Clostridia;o__Christensenellales;f__Christensenellaceae;g__Christensenellaceae_R-7_group;s__
OTU_932	0	1	0	0	0	0	0	3	0	k__Bacteria;p__Firmicutes
OTU_933	1	1	1	0	3	2	5	1	0	k__Bacteria;p__Firmicutes;c__Clostridia
OTU_934	0	0	3	2	0	0	0	0	1	k__Bacteria;p__Bacteroidota;c__Bacteroidia;o__Bacteroidales;f__Muribaculaceae;g__;s__
OTU_935	2	0	3	1	0	4	2	0	0	k__Bacteria;p__Bacteroidota;c__Bacteroidia
OTU_936	0	4	0	0	0	0	0	2	1	k__Bacteria;p__Firmicutes;c__Bacilli;o__Lactobacillales;f__Vagococcaceae;g__Vagococcus
OTU_937	8	1	4	7	2	2	9	2	1	k__Bacteria;p__Firmicutes;c__Clostridia;o__Lachnospirales;f__Lachnospiraceae;g__Marvinbryantia
OTU_938	1	4	0	1	1	2	3	1	0	k__Bacteria;p__Firmicutes;c__Clostridia;o__Monoglobales;f__Monoglobaceae;g__Monoglobus
OTU_939	0	0	3	2	5	0	0	0	0	k__Bacteria;p__Firmicutes;c__Clostridia;o__Clostridia_UCG-014;f__;g__;s__
OTU_940	0	1	6	0	0	0	0	0	0	k__Bacteria;p__Bacteroidota;c__Bacteroidia;o__Bacteroidales;f__Muribaculaceae;g__;s__
OTU_941	0	0	1	0	0	0	3	2	0	k__Bacteria;p__unidentified_Bacteria;c__Bacteroidia;o__Bacteroidales;f__;g__;s__
OTU_942	0	0	1	3	5	0	0	0	0	k__Bacteria;p__Firmicutes;c__Clostridia;o__Clostridia_UCG-014;f__;g__;s__
OTU_943	1	0	0	1	0	1	0	1	1	k__Bacteria;p__Firmicutes;c__Clostridia;o__Oscillospirales;f__Ruminococcaceae;g__Anaerotruncus;s__Anaerotruncus_sp_AT3
OTU_944	0	0	0	0	0	5	1	1	0	k__Bacteria;p__Firmicutes;c__Clostridia;o__Oscillospirales;f__[Eubacterium]_coprostanoligenes_group;g__;s__
OTU_945	4	0	0	0	0	0	0	0	0	k__Bacteria;p__Firmicutes;c__Clostridia;o__Clostridia_vadinBB60_group;f__;g__;s__
OTU_946	0	0	3	0	0	1	0	0	0	k__Bacteria;p__Firmicutes;c__Clostridia;o__Monoglobales;f__Monoglobaceae;g__Monoglobus;s__
OTU_947	0	3	4	3	1	3	0	0	5	k__Bacteria;p__Firmicutes;c__Clostridia;o__Clostridia_vadinBB60_group;f__;g__;s__
OTU_948	1	1	0	1	0	0	0	0	1	k__Bacteria;p__Actinobacteriota;c__Coriobacteriia;o__Coriobacteriales
OTU_949	7	0	0	5	0	4	0	1	0	k__Bacteria;p__Bacteroidota;c__Bacteroidia;o__Bacteroidales;f__Muribaculaceae;g__;s__
OTU_950	0	4	1	3	0	0	0	2	0	k__Bacteria;p__Firmicutes;c__Clostridia;o__Lachnospirales;f__Lachnospiraceae;g__Acetitomaculum;s__
OTU_951	0	0	0	3	0	1	1	0	1	k__Bacteria;p__Firmicutes;c__Clostridia;o__Peptostreptococcales-Tissierellales;f__Anaerovoracaceae;g__Anaerovorax
OTU_952	0	0	0	0	0	7	0	0	0	k__Bacteria;p__unidentified_Bacteria;c__Alphaproteobacteria;o__Rhodospirillales;f__;g__;s__
OTU_953	2	0	0	0	1	1	3	1	0	k__Bacteria;p__Firmicutes;c__Clostridia;o__Lachnospirales;f__Lachnospiraceae;g__Acetitomaculum;s__
OTU_954	0	0	0	0	0	25	0	0	0	k__Bacteria;p__Bacteroidota;c__Bacteroidia;o__Bacteroidales;f__Bacteroidaceae;g__Bacteroides;s__Bacteroides_caccae
OTU_955	9	7	14	2	38	16	13	11	1	k__Bacteria;p__Firmicutes;c__Clostridia;o__Christensenellales;f__Christensenellaceae;g__Christensenellaceae_R-7_group;s__
OTU_956	6	6	2	0	0	1	1	1	1	k__Bacteria;p__Bacteroidota;c__Bacteroidia;o__Bacteroidales;f__Muribaculaceae;g__;s__
OTU_957	0	3	0	0	0	4	0	0	0	k__Bacteria;p__Firmicutes;c__Clostridia;o__Oscillospirales;f__UCG-010;g__;s__
OTU_958	0	1	0	1	0	0	0	1	0	k__Bacteria;p__Firmicutes;c__Clostridia;o__Lachnospirales;f__Lachnospiraceae;g__Acetitomaculum;s__
OTU_959	0	0	5	0	1	0	0	0	0	k__Bacteria;p__Bacteroidota;c__Bacteroidia;o__Bacteroidales;f__Rikenellaceae;g__Rikenellaceae_RC9_gut_group;s__
OTU_960	0	2	0	1	0	2	0	2	0	k__Bacteria;p__Actinobacteriota;c__Coriobacteriia;o__Coriobacteriales;f__Eggerthellaceae;g__Enterorhabdus;s__
OTU_961	1	4	1	0	1	3	1	2	0	k__Bacteria
OTU_962	0	0	1	3	0	1	0	4	1	k__Bacteria;p__Firmicutes;c__Clostridia;o__Monoglobales;f__Monoglobaceae;g__Monoglobus;s__
OTU_963	0	5	1	0	0	0	0	0	0	k__Bacteria;p__Firmicutes;c__Bacilli;o__RF39;f__;g__;s__
OTU_964	0	0	0	1	4	1	1	16	0	k__Bacteria;p__Firmicutes;c__Clostridia;o__Oscillospirales;f__Ruminococcaceae;g__CAG-352;s__
OTU_965	0	0	2	1	0	2	1	2	0	k__Bacteria;p__Firmicutes;c__Clostridia;o__Lachnospirales;f__Lachnospiraceae
OTU_966	0	1	5	0	1	0	0	1	0	k__Bacteria;p__Actinobacteriota;c__Coriobacteriia;o__Coriobacteriales;f__Atopobiaceae;g__Olsenella;s__
OTU_967	1	4	0	0	0	4	9	0	0	k__Bacteria;p__Firmicutes;c__Clostridia;o__Clostridia_UCG-014;f__;g__;s__
OTU_968	0	0	2	1	1	1	0	0	1	k__Archaea;p__Euryarchaeota;c__Methanobacteria;o__Methanobacteriales;f__Methanobacteriaceae;g__Methanobrevibacter
OTU_969	3	0	3	1	5	0	1	0	0	k__Bacteria;p__Actinobacteriota;c__Coriobacteriia;o__Coriobacteriales;f__Eggerthellaceae;g__Enterorhabdus;s__
OTU_970	0	1	3	0	0	1	1	0	0	k__Bacteria;p__Firmicutes;c__Clostridia;o__Oscillospirales;f__UCG-010;g__;s__
OTU_971	9	6	1	3	0	2	2	0	0	k__Bacteria;p__Bacteroidota;c__Bacteroidia;o__Bacteroidales;f__Rikenellaceae;g__Rikenellaceae_RC9_gut_group;s__
OTU_972	4	1	4	5	2	0	1	0	0	k__Bacteria;p__Bacteroidota;c__Bacteroidia;o__Bacteroidales;f__Muribaculaceae;g__;s__
OTU_973	2	0	0	3	0	8	0	2	2	k__Bacteria;p__Proteobacteria;c__Gammaproteobacteria;o__Burkholderiales;f__Sutterellaceae;g__Parasutterella;s__
OTU_974	2	6	0	1	2	0	0	0	1	k__Bacteria;p__Firmicutes;c__Clostridia;o__Lachnospirales;f__Lachnospiraceae
OTU_975	0	0	0	1	0	1	0	0	4	k__Bacteria;p__Firmicutes;c__Clostridia;o__Oscillospirales;f__[Eubacterium]_coprostanoligenes_group;g__;s__
OTU_976	0	0	3	0	0	0	0	1	0	k__Bacteria;p__Bacteroidota;c__Bacteroidia;o__Bacteroidales;f__Prevotellaceae;g__Prevotellaceae_UCG-004;s__
OTU_977	9	1	4	1	6	4	2	1	14	k__Bacteria;p__Cyanobacteria;c__Vampirivibrionia;o__Gastranaerophilales;f__;g__;s__
OTU_978	2	1	0	0	1	4	0	2	0	k__Bacteria;p__unidentified_Bacteria;c__Clostridia;o__Oscillospirales;f__Ruminococcaceae;g__;s__
OTU_979	1	5	1	1	3	3	12	0	1	k__Bacteria;p__Firmicutes;c__Bacilli;o__Lactobacillales;f__Streptococcaceae;g__Streptococcus
OTU_980	1	0	4	0	3	2	0	0	0	k__Bacteria;p__Bacteroidota;c__Bacteroidia;o__Bacteroidales;f__Prevotellaceae;g__Prevotellaceae_UCG-003;s__
OTU_981	1	0	0	0	0	3	3	1	2	k__Bacteria;p__unidentified_Bacteria
OTU_982	1	0	0	0	1	0	0	0	3	k__Bacteria;p__unidentified_Bacteria;c__Verrucomicrobiae;o__Opitutales;f__Puniceicoccaceae;g__;s__
OTU_983	1	0	0	1	1	0	7	1	1	k__Bacteria;p__Proteobacteria;c__Alphaproteobacteria;o__Rhizobiales;f__Beijerinckiaceae
OTU_984	1	2	3	0	3	1	0	3	2	k__Bacteria;p__Firmicutes;c__Clostridia;o__Peptostreptococcales-Tissierellales;f__Anaerovoracaceae;g__Family_XIII_AD3011_group;s__
OTU_985	0	0	0	0	0	0	0	8	3	k__Bacteria;p__Bacteroidota;c__Bacteroidia;o__Bacteroidales;f__Muribaculaceae;g__;s__
OTU_986	1	8	6	1	1	0	2	1	1	k__Bacteria;p__Firmicutes;c__Clostridia;o__Oscillospirales
OTU_987	0	1	8	0	1	2	0	0	0	k__Bacteria;p__Firmicutes;c__Clostridia;o__Clostridia_vadinBB60_group;f__;g__;s__
OTU_988	0	2	4	2	1	2	2	4	0	k__Bacteria;p__Firmicutes;c__Clostridia;o__Oscillospirales;f__Oscillospiraceae
OTU_989	0	1	0	0	0	4	1	0	0	k__Bacteria;p__Firmicutes;c__Clostridia;o__Oscillospirales;f__[Eubacterium]_coprostanoligenes_group;g__;s__
OTU_990	3	0	0	1	0	20	0	3	0	k__Bacteria;p__Bacteroidota;c__Bacteroidia;o__Bacteroidales;f__Tannerellaceae;g__Parabacteroides;s__Parabacteroides_sp_CT06
OTU_991	1	0	1	0	0	0	0	5	0	k__Bacteria;p__Firmicutes;c__Clostridia;o__Oscillospirales;f__Ruminococcaceae
OTU_992	0	1	2	1	1	0	1	1	0	k__Bacteria;p__Firmicutes;c__Clostridia;o__Christensenellales;f__Christensenellaceae;g__Christensenellaceae_R-7_group;s__
OTU_993	3	3	0	3	0	0	0	1	1	k__Bacteria;p__Firmicutes;c__Clostridia;o__Peptococcales;f__Peptococcaceae;g__Peptococcus;s__
OTU_994	9	1	3	3	0	1	0	1	1	k__Bacteria;p__Bacteroidota;c__Bacteroidia;o__Bacteroidales;f__Muribaculaceae
OTU_995	0	0	0	2	1	0	4	0	0	k__Bacteria;p__Bacteroidota;c__Bacteroidia;o__Bacteroidales;f__Prevotellaceae;g__Prevotella;s__
OTU_996	2	0	3	0	0	0	1	2	0	k__Bacteria;p__Firmicutes;c__Clostridia;o__Oscillospirales
OTU_997	2	2	0	0	1	0	0	0	0	k__Bacteria;p__Firmicutes;c__Clostridia;o__Oscillospirales;f__Ruminococcaceae;g__Paludicola;s__
OTU_998	1	0	0	0	4	0	0	0	0	k__Bacteria;p__unidentified_Bacteria;c__Clostridia;o__Oscillospirales;f__Ruminococcaceae;g__;s__
OTU_999	0	3	2	0	0	2	1	0	4	k__Bacteria;p__Firmicutes;c__Clostridia;o__Clostridia_vadinBB60_group;f__unidentified_Clostridia_vadinBB60_group;g__unidentified_Clostridia_vadinBB60_group;s__Clostridiales_bacterium_enrichment_culture_clone_06-1235251-76
OTU_1000	1	0	0	0	0	0	0	6	0	k__Bacteria;p__Firmicutes;c__Bacilli;o__Erysipelotrichales;f__Erysipelatoclostridiaceae;g__Candidatus_Stoquefichus
OTU_1001	0	1	0	11	0	0	0	0	1	k__Bacteria;p__Bacteroidota;c__Bacteroidia;o__Bacteroidales;f__Rikenellaceae;g__Rikenellaceae_RC9_gut_group;s__
OTU_1002	0	4	6	0	0	0	0	0	0	k__Bacteria;p__Bacteroidota;c__Bacteroidia;o__Bacteroidales;f__Prevotellaceae;g__Prevotella;s__
OTU_1003	0	3	0	0	0	0	0	0	0	k__Bacteria;p__Firmicutes;c__Clostridia
OTU_1004	0	2	4	1	0	1	0	1	0	k__Bacteria;p__Firmicutes;c__Bacilli;o__RF39;f__;g__;s__
OTU_1005	0	0	0	2	1	0	1	7	0	k__Bacteria;p__Firmicutes;c__Clostridia;o__Christensenellales;f__Christensenellaceae;g__Christensenellaceae_R-7_group;s__
OTU_1006	6	2	0	4	0	2	0	3	0	k__Bacteria;p__Firmicutes;c__Clostridia;o__Monoglobales;f__Monoglobaceae;g__Monoglobus;s__
OTU_1007	0	0	0	0	0	0	0	13	0	k__Bacteria;p__Firmicutes;c__Negativicutes;o__Veillonellales-Selenomonadales;f__Veillonellaceae;g__Dialister;s__Dialister_sp_Marseille-P5638
OTU_1008	0	0	4	2	0	2	1	0	4	k__Bacteria;p__Firmicutes;c__Clostridia
OTU_1009	0	4	0	2	1	2	0	0	0	k__Bacteria;p__Firmicutes;c__Bacilli;o__RF39;f__;g__;s__
OTU_1010	23	78	64	52	14	29	16	24	7	k__Bacteria;p__Firmicutes;c__Clostridia;o__Clostridia_UCG-014;f__;g__;s__
OTU_1011	4	1	1	1	0	0	1	0	0	k__Bacteria;p__Firmicutes;c__Bacilli;o__Mycoplasmatales;f__Mycoplasmataceae;g__Mycoplasma;s__Mesomycoplasma_moatsii
OTU_1012	0	0	0	0	0	0	0	0	9	k__Bacteria;p__Bacteroidota;c__Bacteroidia;o__Bacteroidales;f__Prevotellaceae;g__Prevotella;s__
OTU_1013	2	1	0	0	0	0	0	0	0	k__Bacteria;p__Firmicutes;c__Clostridia;o__Oscillospirales;f__Ruminococcaceae;g__Ruminococcus
OTU_1014	1	3	2	2	1	0	0	0	0	k__Bacteria;p__Bacteroidota;c__Bacteroidia;o__Bacteroidales;f__Rikenellaceae;g__Rikenellaceae_RC9_gut_group;s__
OTU_1015	0	0	1	2	0	0	0	0	0	k__Bacteria;p__Firmicutes;c__Clostridia;o__Monoglobales;f__Monoglobaceae;g__Monoglobus;s__
OTU_1016	0	0	0	0	1	0	1	3	2	k__Bacteria;p__Bacteroidota;c__Bacteroidia;o__Bacteroidales;f__F082;g__unidentified_F082;s__Bacteroidales_bacterium_Bact_22
OTU_1017	1	7	0	1	3	1	2	1	1	k__Bacteria;p__unidentified_Bacteria;c__Alphaproteobacteria;o__Rhodospirillales;f__;g__;s__
OTU_1018	0	1	0	0	0	3	1	0	0	k__Bacteria;p__unidentified_Bacteria;c__Desulfovibrionia;o__Desulfovibrionales;f__Desulfovibrionaceae;g__;s__
OTU_1019	0	0	0	1	0	0	6	0	0	k__Bacteria;p__Firmicutes;c__Clostridia;o__Lachnospirales;f__Lachnospiraceae
OTU_1020	0	0	3	1	2	2	2	0	0	k__Bacteria;p__Bacteroidota;c__Bacteroidia;o__Bacteroidales;f__Muribaculaceae;g__;s__
OTU_1021	1	0	0	3	0	6	0	0	0	k__Bacteria;p__Bacteroidota;c__Bacteroidia;o__Bacteroidales;f__Prevotellaceae;g__Prevotella;s__
OTU_1022	1	1	1	1	1	3	1	1	2	k__Bacteria;p__Firmicutes;c__Clostridia;o__Peptostreptococcales-Tissierellales;f__Anaerovoracaceae;g__[Eubacterium]_brachy_group;s__
OTU_1023	0	9	5	0	4	0	0	0	0	k__Bacteria;p__Bacteroidota;c__Bacteroidia;o__Bacteroidales;f__Muribaculaceae;g__;s__
OTU_1024	0	0	3	0	0	0	1	4	1	k__Archaea;p__Euryarchaeota;c__Methanobacteria;o__Methanobacteriales;f__Methanobacteriaceae;g__Methanosphaera;s__Methanosphaera_cuniculi
OTU_1025	0	0	0	0	4	0	0	0	1	k__Bacteria;p__Firmicutes;c__Bacilli;o__Bacillales;f__Planococcaceae;g__Lysinibacillus;s__Lysinibacillus_sp_YS11
OTU_1026	4	1	0	0	1	2	0	1	1	k__Bacteria;p__Actinobacteriota;c__Coriobacteriia;o__Coriobacteriales
OTU_1027	0	0	3	0	0	0	0	0	0	k__Bacteria;p__Actinobacteriota;c__Coriobacteriia;o__Coriobacteriales;f__Eggerthellaceae;g__DNF00809;s__
OTU_1028	1	1	0	0	0	0	2	0	1	k__Bacteria;p__unidentified_Bacteria;c__Clostridia;o__Oscillospirales;f__Ruminococcaceae;g__;s__
OTU_1029	47	10	1	1	3	1	1	1	0	k__Bacteria;p__Firmicutes;c__Clostridia;o__Oscillospirales;f__Oscillospiraceae;g__Oscillospira;s__
OTU_1030	0	0	0	0	0	8	0	0	0	k__Bacteria;p__Bacteroidota;c__Bacteroidia;o__Bacteroidales;f__Bacteroidaceae;g__Bacteroides
OTU_1031	0	0	0	0	0	2	0	0	0	k__Bacteria
OTU_1032	0	0	0	0	0	0	2	0	0	k__Bacteria;p__Firmicutes;c__Clostridia;o__Lachnospirales;f__Lachnospiraceae
OTU_1033	0	2	0	0	0	0	0	0	0	k__Bacteria;p__Spirochaetota;c__Spirochaetia;o__Spirochaetales;f__Spirochaetaceae;g__Treponema
OTU_1034	0	1	0	0	1	1	0	0	0	k__Bacteria;p__Firmicutes;c__Bacilli;o__RF39;f__;g__;s__
OTU_1035	4	0	0	3	0	0	1	0	4	k__Bacteria;p__Bacteroidota;c__Bacteroidia;o__Bacteroidales;f__Muribaculaceae;g__;s__
OTU_1036	0	0	0	0	0	0	2	0	0	k__Bacteria;p__Bacteroidota;c__Bacteroidia;o__Bacteroidales;f__F082;g__unidentified_F082;s__Bacteroidales_bacterium_Bact_22
OTU_1037	0	0	2	0	0	0	0	0	0	k__Bacteria;p__Firmicutes;c__Clostridia
OTU_1038	0	5	1	0	1	0	1	0	1	k__Bacteria;p__Firmicutes;c__Bacilli;o__RF39;f__;g__;s__
OTU_1039	54	136	218	77	86	70	37	91	31	k__Bacteria;p__Firmicutes;c__Clostridia;o__Clostridia_UCG-014;f__;g__;s__
OTU_1040	13	10	10	14	48	10	10	239	6	k__Bacteria;p__Firmicutes;c__Clostridia;o__Oscillospirales;f__Ruminococcaceae;g__CAG-352;s__
OTU_1041	5	1	0	10	1	1	6	1	1	k__Bacteria;p__Bacteroidota;c__Bacteroidia;o__Bacteroidales;f__Muribaculaceae;g__;s__
OTU_1042	0	0	0	0	0	0	0	0	2	k__Bacteria
OTU_1043	12	8	12	1	22	18	7	0	0	k__Bacteria;p__Bacteroidota;c__Bacteroidia;o__Bacteroidales;f__Prevotellaceae;g__Prevotella
OTU_1044	0	0	0	0	0	0	8	0	6	k__Bacteria;p__Bacteroidota;c__Bacteroidia;o__Bacteroidales;f__Prevotellaceae;g__Prevotella;s__
OTU_1045	0	2	1	0	0	1	0	1	0	k__Bacteria
OTU_1046	10	4	12	7	9	9	5	11	5	k__Bacteria;p__unidentified_Bacteria;c__Clostridia;o__Oscillospirales;f__Oscillospiraceae;g__;s__
OTU_1047	0	8	3	0	0	3	1	0	1	k__Bacteria;p__unidentified_Bacteria;c__Alphaproteobacteria;o__Rhodospirillales;f__;g__;s__
OTU_1048	0	0	0	0	0	0	0	2	0	k__Bacteria;p__Firmicutes;c__Clostridia;o__Christensenellales;f__Christensenellaceae;g__Christensenellaceae_R-7_group;s__bacterium_enrichment_culture_clone_RB7c
OTU_1049	7	3	8	2	2	0	0	1	0	k__Bacteria;p__Bacteroidota;c__Bacteroidia;o__Bacteroidales;f__Prevotellaceae;g__Prevotella;s__
OTU_1050	0	2	0	0	0	0	0	0	0	k__Bacteria;p__Firmicutes;c__Clostridia;o__Monoglobales;f__Monoglobaceae;g__Monoglobus;s__
OTU_1051	0	0	0	2	1	1	1	0	0	k__Bacteria;p__Firmicutes;c__Bacilli;o__Erysipelotrichales;f__Erysipelotrichaceae;g__Erysipelotrichaceae_UCG-009;s__
OTU_1052	1	5	1	1	0	0	0	0	0	k__Bacteria;p__Firmicutes;c__Clostridia;o__Oscillospirales;f__UCG-010;g__;s__
OTU_1053	19	41	205	33	83	304	46	96	61	k__Bacteria;p__Firmicutes;c__Clostridia;o__Oscillospirales;f__Oscillospiraceae;g__NK4A214_group;s__
OTU_1054	0	0	0	0	0	0	2	0	0	k__Bacteria
OTU_1055	1	4	0	0	0	0	0	0	0	k__Bacteria;p__Bacteroidota;c__Bacteroidia;o__Bacteroidales;f__Prevotellaceae
OTU_1056	2	0	2	1	1	0	0	2	0	k__Bacteria;p__unidentified_Bacteria;c__Clostridia;o__Lachnospirales;f__Lachnospiraceae;g__;s__
OTU_1057	0	1	0	0	1	0	0	0	0	k__Bacteria;p__Firmicutes;c__Clostridia;o__Oscillospirales;f__UCG-010;g__;s__
OTU_1058	0	0	0	2	0	0	0	0	0	Unknown
OTU_1059	1	0	0	1	0	2	0	0	0	k__Bacteria;p__Firmicutes;c__Clostridia;o__Lachnospirales;f__Lachnospiraceae;g__ASF356;s__
OTU_1060	69	10	50	51	37	23	11	38	24	k__Bacteria;p__Firmicutes;c__Clostridia;o__Lachnospirales;f__Lachnospiraceae;g__[Eubacterium]_xylanophilum_group;s__
OTU_1061	0	0	0	4	0	12	0	1	0	k__Bacteria;p__Bacteroidota;c__Bacteroidia;o__Bacteroidales;f__Prevotellaceae;g__Alloprevotella;s__
OTU_1062	7	2	10	15	167	32	12	12	2	k__Bacteria;p__Firmicutes;c__Clostridia;o__Lachnospirales;f__Lachnospiraceae;g__Lachnospiraceae_NK4A136_group;s__bacterium_YGB2004
OTU_1063	0	2	9	0	0	0	0	0	2	k__Bacteria;p__Firmicutes;c__Clostridia;o__Lachnospirales;f__Lachnospiraceae;g__Butyrivibrio
OTU_1064	0	0	0	1	0	1	0	0	0	k__Bacteria;p__Firmicutes;c__Clostridia;o__Clostridiales;f__Clostridiaceae;g__Clostridium_sensu_stricto_1;s__Clostridium_butyricum
OTU_1065	0	0	0	15	0	1	2	3	30	k__Bacteria;p__Bacteroidota;c__Bacteroidia;o__Bacteroidales;f__Prevotellaceae;g__Prevotella;s__
OTU_1066	0	0	0	0	0	0	4	0	0	k__Bacteria;p__Bacteroidota;c__Bacteroidia;o__Bacteroidales;f__F082
OTU_1067	3	0	0	3	4	0	0	1	0	k__Bacteria;p__Firmicutes;c__Clostridia;o__Christensenellales;f__Christensenellaceae;g__Christensenellaceae_R-7_group;s__
OTU_1068	19	88	200	74	52	31	43	15	63	k__Bacteria;p__Firmicutes;c__Clostridia;o__Oscillospirales;f__Ruminococcaceae;g__Ruminococcus;s__rumen_bacterium_NK4A78
OTU_1069	0	2	0	0	0	2	0	0	0	k__Bacteria;p__Actinobacteriota;c__Actinobacteria;o__Micrococcales;f__Microbacteriaceae;g__Leucobacter
OTU_1070	0	2	0	0	0	0	0	0	0	k__Bacteria;p__Firmicutes;c__Clostridia;o__Christensenellales;f__Christensenellaceae;g__Christensenellaceae_R-7_group
OTU_1071	4	4	0	1	0	0	0	0	3	k__Bacteria;p__Cyanobacteria;c__Vampirivibrionia;o__Gastranaerophilales;f__;g__;s__
OTU_1072	5	0	1	0	0	1	0	0	2	k__Bacteria;p__Firmicutes;c__Bacilli;o__RF39;f__;g__;s__
OTU_1073	5	13	22	9	4	2	29	3	0	k__Bacteria;p__Firmicutes;c__Clostridia;o__Clostridia_UCG-014;f__;g__;s__
OTU_1074	0	1	0	2	1	1	1	1	0	k__Bacteria;p__Firmicutes;c__Clostridia;o__Oscillospirales;f__Ruminococcaceae;g__Candidatus_Soleaferrea;s__Ruminococcaceae_bacterium_GD6
OTU_1075	2	0	4	0	0	0	2	0	0	k__Bacteria;p__Bacteroidota;c__Bacteroidia;o__Bacteroidales;f__Marinifilaceae;g__Odoribacter;s__
OTU_1076	0	0	0	3	0	0	0	0	0	k__Bacteria;p__Cyanobacteria;c__Vampirivibrionia;o__Gastranaerophilales;f__;g__;s__
OTU_1077	0	2	1	1	0	0	2	1	1	k__Bacteria;p__Firmicutes;c__Clostridia;o__Oscillospirales;f__unidentified_Oscillospirales;g__Hydrogenoanaerobacterium;s__
OTU_1078	1	2	1	0	1	0	0	0	1	k__Bacteria;p__Firmicutes;c__Clostridia;o__Lachnospirales;f__Lachnospiraceae
OTU_1079	1	0	0	1	3	1	9	0	0	k__Bacteria;p__Firmicutes;c__Clostridia;o__Oscillospirales;f__Ruminococcaceae;g__CAG-352;s__
OTU_1080	0	1	3	1	3	1	1	0	0	k__Bacteria
OTU_1081	2	0	0	2	0	0	0	0	0	k__Bacteria
OTU_1082	1	0	5	2	0	0	0	3	0	k__Bacteria;p__unidentified_Bacteria;c__Clostridia;o__Peptococcales;f__Peptococcaceae;g__;s__
OTU_1083	0	0	0	0	0	3	0	0	0	k__Bacteria;p__Bacteroidota;c__Bacteroidia;o__Bacteroidales;f__Prevotellaceae;g__Prevotella
OTU_1084	0	0	0	0	3	0	5	2	0	k__Bacteria;p__Bacteroidota;c__Bacteroidia;o__Bacteroidales;f__F082;g__unidentified_F082;s__Bacteroidales_bacterium_Bact_22
OTU_1085	0	0	0	0	0	0	2	0	0	k__Bacteria
OTU_1086	0	2	0	0	0	0	5	0	0	k__Bacteria;p__Bacteroidota;c__Bacteroidia;o__Bacteroidales;f__F082
OTU_1087	0	0	2	0	0	0	0	0	0	k__Bacteria;p__Bacteroidota;c__Bacteroidia;o__Bacteroidales;f__Prevotellaceae
OTU_1088	0	0	0	0	0	0	2	0	0	k__Bacteria;p__Firmicutes;c__Clostridia;o__Lachnospirales;f__Lachnospiraceae
OTU_1089	0	0	1	1	0	0	0	2	0	k__Bacteria;p__Firmicutes;c__Clostridia;o__Oscillospirales;f__Ruminococcaceae;g__;s__
OTU_1090	9	3	42	16	19	2	21	3	4	k__Bacteria;p__Firmicutes;c__Clostridia;o__Oscillospirales;f__Oscillospiraceae;g__UCG-005;s__
OTU_1091	0	1	2	1	0	6	0	1	1	k__Bacteria;p__Firmicutes;c__Clostridia;o__Oscillospirales;f__Oscillospiraceae;g__Colidextribacter
OTU_1092	0	0	0	1	0	0	0	1	0	k__Bacteria;p__Firmicutes;c__Clostridia;o__Oscillospirales;f__UCG-010
OTU_1093	0	0	0	0	0	0	1	7	0	k__Bacteria;p__Bacteroidota;c__Bacteroidia;o__Bacteroidales;f__Bacteroidaceae;g__Bacteroides;s__Bacteroides_eggerthii
OTU_1094	0	2	4	1	1	13	0	3	1	k__Bacteria;p__Firmicutes;c__Clostridia;o__Lachnospirales;f__Lachnospiraceae;g__Lachnospira;s__
OTU_1095	5	32	0	0	1	1	0	0	0	k__Bacteria;p__Bacteroidota;c__Bacteroidia;o__Bacteroidales;f__Prevotellaceae;g__Prevotella
OTU_1096	0	0	0	2	0	0	0	0	0	Unknown
OTU_1097	4	5	4	0	1	1	3	14	4	k__Bacteria;p__Firmicutes;c__Clostridia;o__Oscillospirales;f__[Eubacterium]_coprostanoligenes_group;g__;s__
OTU_1098	1	2	0	1	0	0	0	1	0	k__Bacteria
OTU_1099	0	0	2	0	2	12	0	1	0	k__Bacteria;p__Bacteroidota;c__Bacteroidia;o__Bacteroidales;f__Rikenellaceae;g__Alistipes
OTU_1100	0	0	0	0	0	0	3	1	0	k__Bacteria;p__Bacteroidota;c__Bacteroidia;o__Bacteroidales;f__Rikenellaceae;g__Rikenellaceae_RC9_gut_group;s__
OTU_1101	2	4	3	1	0	0	0	1	0	k__Bacteria;p__unidentified_Bacteria;c__Desulfovibrionia;o__Desulfovibrionales;f__Desulfovibrionaceae;g__;s__
OTU_1102	0	4	1	0	2	0	0	1	0	k__Bacteria;p__unidentified_Bacteria;c__Clostridia;o__Oscillospirales;f__Ruminococcaceae;g__unidentified_Ruminococcaceae;s__[Clostridium]_leptum
OTU_1103	0	0	0	0	0	0	4	0	0	k__Bacteria;p__Bacteroidota;c__Bacteroidia;o__Bacteroidales;f__Prevotellaceae;g__Prevotella;s__
OTU_1104	0	0	0	0	2	0	0	0	0	k__Bacteria;p__Bacteroidota;c__Bacteroidia;o__Bacteroidales;f__F082;g__unidentified_F082;s__Bacteroidales_bacterium_Bact_22
OTU_1105	7	2	10	3	15	5	9	13	5	k__Bacteria;p__Firmicutes;c__Clostridia;o__Lachnospirales;f__Lachnospiraceae
OTU_1106	0	0	0	1	1	0	0	0	1	k__Bacteria
OTU_1107	0	1	0	0	0	0	1	1	2	k__Bacteria;p__Bacteroidota;c__Bacteroidia;o__Bacteroidales;f__Prevotellaceae
OTU_1108	0	2	0	0	0	0	0	0	0	k__Bacteria;p__Firmicutes
OTU_1109	0	0	2	1	1	0	0	0	0	k__Bacteria;p__Firmicutes;c__Clostridia;o__Oscillospirales;f__Oscillospiraceae
OTU_1110	2	0	3	14	1	3	0	3	1	k__Bacteria;p__Firmicutes;c__Clostridia;o__Lachnospirales;f__Lachnospiraceae;g__Moryella;s__
OTU_1111	0	5	0	0	0	0	0	1	0	k__Bacteria;p__Bacteroidota;c__Bacteroidia;o__Bacteroidales;f__Rikenellaceae
OTU_1112	0	0	0	0	0	0	0	0	2	k__Bacteria;p__Bacteroidota;c__Bacteroidia;o__Bacteroidales;f__Prevotellaceae
OTU_1113	0	0	0	0	0	0	0	5	0	k__Bacteria;p__unidentified_Bacteria;c__Alphaproteobacteria;o__Rhodospirillales;f__;g__;s__
OTU_1114	0	1	0	1	0	3	0	0	0	k__Bacteria
OTU_1115	0	0	1	6	1	0	0	0	4	k__Bacteria;p__unidentified_Bacteria;c__Alphaproteobacteria;o__Rhodospirillales;f__;g__;s__
OTU_1116	131	119	2109	139	183	428	201	193	202	k__Bacteria;p__Firmicutes;c__Clostridia;o__Christensenellales;f__Christensenellaceae;g__Christensenellaceae_R-7_group;s__
OTU_1117	0	0	0	0	3	0	0	6	3	k__Bacteria;p__Bacteroidota;c__Bacteroidia;o__Bacteroidales;f__F082
OTU_1118	1	0	2	2	2	0	0	0	0	k__Bacteria;p__Bacteroidota;c__Bacteroidia;o__Bacteroidales;f__Muribaculaceae;g__;s__
OTU_1119	0	0	0	2	0	0	0	0	0	Unknown
OTU_1120	0	0	0	0	2	0	1	0	0	k__Bacteria;p__Firmicutes;c__Bacilli;o__Erysipelotrichales;f__Erysipelatoclostridiaceae;g__Candidatus_Stoquefichus;s__
OTU_1121	0	0	2	0	0	0	0	0	0	Unknown
OTU_1122	3	2	6	0	8	1	6	5	5	k__Bacteria;p__Bacteroidota;c__Bacteroidia;o__Bacteroidales;f__Muribaculaceae;g__;s__
OTU_1123	0	0	2	2	0	1	0	3	0	k__Bacteria;p__Bacteroidota;c__Bacteroidia;o__Bacteroidales;f__Prevotellaceae;g__Prevotellaceae_UCG-003;s__
OTU_1124	0	1	0	2	0	0	0	0	0	k__Bacteria;p__Bacteroidota;c__Bacteroidia;o__Bacteroidales;f__F082;g__;s__
OTU_1125	0	0	0	0	2	0	0	0	0	k__Bacteria;p__Firmicutes
OTU_1126	1	2	2	0	1	2	10	1	0	k__Bacteria;p__Firmicutes;c__Clostridia;o__Lachnospirales;f__Lachnospiraceae;g__Butyrivibrio;s__
OTU_1127	1	2	0	0	0	2	0	0	0	k__Bacteria;p__Firmicutes;c__Bacilli;o__RF39;f__;g__;s__
OTU_1128	2	0	0	0	0	0	0	0	0	k__Bacteria
OTU_1129	8	6	8	3	14	7	10	23	3	k__Bacteria;p__Firmicutes;c__Clostridia;o__Christensenellales;f__Christensenellaceae;g__Christensenellaceae_R-7_group;s__
OTU_1130	4	2	40	7	2	285	14	1	15	k__Bacteria;p__Bacteroidota;c__Bacteroidia;o__Bacteroidales;f__Prevotellaceae;g__Prevotella;s__
OTU_1131	0	1	0	0	3	0	1	0	1	k__Bacteria;p__Firmicutes;c__Clostridia;o__Peptostreptococcales-Tissierellales;f__Anaerovoracaceae;g__[Eubacterium]_brachy_group;s__
OTU_1132	1	1	0	3	1	2	0	2	3	k__Bacteria;p__Firmicutes;c__Clostridia;o__Oscillospirales;f__Oscillospiraceae;g__UCG-002;s__
OTU_1133	0	2	0	0	0	0	0	0	0	k__Bacteria
OTU_1134	0	0	0	0	0	2	2	0	0	k__Bacteria;p__Proteobacteria;c__Gammaproteobacteria;o__Aeromonadales;f__Succinivibrionaceae;g__Succinivibrionaceae_UCG-002;s__
OTU_1135	0	0	0	0	1	0	2	0	1	k__Bacteria;p__Firmicutes;c__Clostridia;o__Lachnospirales;f__Defluviitaleaceae;g__Defluviitaleaceae_UCG-011;s__
OTU_1136	0	0	0	2	0	0	0	0	0	k__Bacteria;p__Firmicutes;c__Clostridia;o__Oscillospirales;f__Ruminococcaceae;g__Phocea;s__
OTU_1137	0	0	0	0	2	0	0	0	0	k__Bacteria;p__Firmicutes;c__Clostridia;o__Clostridia_UCG-014;f__;g__;s__
OTU_1138	0	0	4	0	0	0	0	0	0	k__Bacteria;p__Firmicutes;c__Clostridia;o__Oscillospirales;f__UCG-010;g__;s__
OTU_1139	0	0	0	0	0	0	0	4	0	k__Bacteria;p__Firmicutes;c__Clostridia;o__Lachnospirales;f__Lachnospiraceae;g__Blautia;s__
OTU_1140	3	3	5	2	1	0	0	0	0	k__Bacteria;p__Firmicutes;c__Clostridia
OTU_1141	0	5	0	0	0	3	0	0	0	k__Bacteria;p__Firmicutes;c__Clostridia;o__Lachnospirales;f__Lachnospiraceae
OTU_1142	2	0	0	0	0	0	0	0	0	k__Bacteria;p__Bacteroidota;c__Bacteroidia;o__Bacteroidales
OTU_1143	0	1	0	5	1	0	0	1	0	k__Bacteria;p__Firmicutes;c__Clostridia;o__Christensenellales;f__Christensenellaceae;g__Christensenellaceae_R-7_group;s__
OTU_1144	0	5	2	0	1	0	0	0	0	k__Bacteria;p__Firmicutes;c__Clostridia;o__Clostridia_vadinBB60_group;f__;g__;s__
OTU_1145	0	1	0	1	0	1	1	1	0	k__Bacteria;p__Firmicutes;c__Clostridia;o__Christensenellales;f__Christensenellaceae
OTU_1146	0	1	0	0	0	0	0	4	0	k__Bacteria;p__Fusobacteriota;c__Fusobacteriia;o__Fusobacteriales;f__Fusobacteriaceae;g__Cetobacterium;s__
OTU_1147	4	1	0	0	0	0	0	0	0	k__Bacteria
OTU_1148	2	0	0	1	0	0	0	0	0	k__Bacteria;p__Bacteroidota;c__Bacteroidia;o__Bacteroidales;f__Muribaculaceae;g__;s__
OTU_1149	3	0	2	0	4	0	11	2	1	k__Bacteria;p__Firmicutes;c__Clostridia;o__Peptostreptococcales-Tissierellales;f__Anaerovoracaceae;g__[Eubacterium]_nodatum_group;s__
OTU_1150	3	0	0	1	0	0	0	0	2	k__Bacteria;p__Firmicutes;c__Clostridia;o__Eubacteriales;f__Anaerofustaceae;g__Anaerofustis;s__
OTU_1151	0	2	0	0	2	1	1	1	0	k__Bacteria;p__Firmicutes;c__Clostridia;o__Christensenellales;f__Christensenellaceae;g__Christensenellaceae_R-7_group
OTU_1152	57	5	9	23	20	28	3	0	3	k__Bacteria;p__Firmicutes;c__Clostridia;o__Oscillospirales;f__Ruminococcaceae;g__Ruminococcus;s__
OTU_1153	7	0	1	1	7	0	1	2	0	k__Bacteria;p__Bacteroidota;c__Bacteroidia;o__Bacteroidales;f__Rikenellaceae;g__SP3-e08;s__
OTU_1154	0	0	2	0	0	0	0	1	0	k__Bacteria;p__Firmicutes;c__Clostridia;o__Oscillospirales;f__Oscillospiraceae
OTU_1155	2	1	9	2	0	4	23	33	2	k__Bacteria;p__Firmicutes;c__Clostridia;o__Lachnospirales;f__Lachnospiraceae;g__Blautia
OTU_1156	0	0	0	0	0	2	0	0	0	k__Bacteria;p__Desulfobacterota;c__Desulfovibrionia;o__Desulfovibrionales;f__Desulfovibrionaceae;g__Desulfovibrio;s__Desulfovibrio_sp_G11
OTU_1157	151	11	75	34	2084	28	12	161	59	k__Bacteria;p__Bacteroidota;c__Bacteroidia;o__Bacteroidales;f__Prevotellaceae;g__Prevotella;s__
OTU_1158	0	0	0	0	0	0	0	0	2	k__Bacteria;p__Firmicutes;c__Clostridia;o__Lachnospirales;f__Lachnospiraceae
OTU_1159	1	0	0	2	0	0	2	0	0	k__Bacteria;p__Firmicutes;c__Clostridia;o__Lachnospirales;f__Lachnospiraceae;g__Tyzzerella
OTU_1160	2	0	0	0	1	3	0	0	0	k__Bacteria
OTU_1161	0	1	0	3	0	0	0	0	0	k__Bacteria;p__Firmicutes;c__Clostridia;o__Monoglobales;f__Monoglobaceae;g__Monoglobus;s__
OTU_1162	0	2	2	3	1	1	0	1	2	k__Bacteria;p__Firmicutes;c__Clostridia;o__Oscillospirales;f__UCG-010;g__;s__
OTU_1163	1	0	0	0	0	0	0	0	1	k__Bacteria;p__Firmicutes;c__Clostridia;o__Peptostreptococcales-Tissierellales;f__Anaerovoracaceae;g__Family_XIII_AD3011_group;s__
OTU_1164	2	0	0	0	0	1	0	0	0	k__Bacteria;p__Bacteroidota;c__Bacteroidia;o__Bacteroidales;f__Rikenellaceae;g__Rikenellaceae_RC9_gut_group
OTU_1165	0	1	0	0	0	5	0	0	0	k__Bacteria;p__Firmicutes;c__Clostridia;o__Christensenellales;f__Christensenellaceae;g__Christensenellaceae_R-7_group
OTU_1166	4	1	0	0	0	0	1	1	0	k__Bacteria;p__Bacteroidota;c__Bacteroidia;o__Bacteroidales;f__Muribaculaceae;g__;s__
OTU_1167	0	0	0	0	0	4	0	0	0	k__Bacteria;p__Desulfobacterota;c__Desulfovibrionia;o__Desulfovibrionales;f__Desulfovibrionaceae;g__Bilophila;s__
OTU_1168	0	0	0	0	0	3	1	0	0	k__Bacteria;p__Firmicutes;c__Clostridia;o__Oscillospirales;f__Ruminococcaceae
OTU_1169	0	0	0	0	0	0	2	0	0	k__Bacteria;p__Bacteroidota;c__Bacteroidia;o__Bacteroidales;f__Prevotellaceae;g__Prevotella;s__
OTU_1170	0	0	2	0	1	0	0	0	0	k__Bacteria;p__Proteobacteria;c__Gammaproteobacteria;o__Aeromonadales;f__Succinivibrionaceae;g__Succinivibrio
OTU_1171	0	0	3	1	2	4	0	3	0	k__Bacteria;p__Proteobacteria;c__Gammaproteobacteria;o__Pasteurellales;f__Pasteurellaceae;g__Bibersteinia
OTU_1172	0	0	0	0	0	0	4	0	0	k__Bacteria;p__Bacteroidota;c__Bacteroidia;o__Bacteroidales;f__F082;g__unidentified_F082;s__Bacteroidales_bacterium_Bact_22
OTU_1173	0	0	0	0	1	2	1	1	0	k__Bacteria;p__Spirochaetota;c__Spirochaetia;o__Spirochaetales;f__Spirochaetaceae;g__Treponema
OTU_1174	0	0	0	0	0	1	0	0	1	k__Bacteria;p__Firmicutes;c__Clostridia;o__Clostridia_vadinBB60_group;f__;g__;s__
OTU_1175	0	0	0	0	0	5	0	0	0	k__Bacteria;p__Bacteroidota;c__Bacteroidia;o__Bacteroidales;f__Bacteroidaceae;g__Bacteroides;s__Bacteroides_caecigallinarum
OTU_1176	1	4	4	9	1	3	0	0	8	k__Bacteria;p__Firmicutes;c__Clostridia;o__Oscillospirales;f__[Eubacterium]_coprostanoligenes_group
OTU_1177	0	0	0	0	0	2	0	0	1	k__Bacteria
OTU_1178	0	0	0	0	1	0	0	5	0	k__Bacteria;p__Firmicutes;c__Negativicutes;o__Veillonellales-Selenomonadales;f__Selenomonadaceae;g__Quinella;s__
OTU_1179	1	0	2	1	0	2	1	5	0	k__Bacteria;p__Firmicutes;c__Clostridia
OTU_1180	0	0	9	1	1	1	2	2	0	k__Bacteria;p__Firmicutes;c__Bacilli;o__RF39;f__;g__;s__
OTU_1181	0	0	2	0	0	0	0	0	0	k__Bacteria;p__Firmicutes;c__Clostridia
OTU_1182	0	0	0	2	0	0	0	0	0	Unknown
OTU_1183	0	0	0	0	2	0	0	0	0	k__Bacteria;p__Firmicutes;c__Clostridia;o__Oscillospirales;f__Ruminococcaceae;g__DTU089;s__
OTU_1184	0	0	0	4	3	0	0	0	0	k__Bacteria;p__Firmicutes;c__Clostridia;o__Lachnospirales;f__Lachnospiraceae
OTU_1185	0	0	0	0	0	3	0	0	0	k__Bacteria;p__Firmicutes;c__Clostridia;o__Lachnospirales;f__Lachnospiraceae
OTU_1186	0	0	0	0	0	0	0	0	2	k__Bacteria;p__Bacteroidota;c__Bacteroidia;o__Bacteroidales;f__Prevotellaceae;g__Prevotella;s__
OTU_1187	0	0	0	0	0	0	0	0	3	k__Bacteria;p__Firmicutes;c__Clostridia;o__Lachnospirales;f__Lachnospiraceae
OTU_1188	0	2	0	0	0	0	0	0	0	k__Bacteria;p__Bacteroidota;c__Bacteroidia;o__Bacteroidales;f__F082
OTU_1189	2	0	0	0	0	0	0	0	0	k__Bacteria;p__unidentified_Bacteria;c__Clostridia;o__Oscillospirales;f__Ruminococcaceae;g__;s__
OTU_1190	2	0	1	0	0	0	0	1	0	k__Bacteria;p__Firmicutes;c__Clostridia;o__Oscillospirales;f__Oscillospiraceae;g__Oscillibacter;s__
OTU_1191	0	8	0	0	0	0	0	0	0	k__Bacteria;p__Bacteroidota;c__Bacteroidia;o__Bacteroidales;f__Prevotellaceae;g__Prevotella
OTU_1192	0	0	0	0	0	0	2	0	0	k__Bacteria;p__Firmicutes;c__Clostridia;o__Lachnospirales;f__Lachnospiraceae
OTU_1193	0	0	0	0	2	0	0	0	0	k__Bacteria;p__Bacteroidota;c__Bacteroidia;o__Bacteroidales;f__F082
OTU_1194	0	3	0	0	0	0	0	0	0	k__Bacteria;p__Firmicutes;c__Clostridia;o__Eubacteriales;f__Anaerofustaceae;g__Anaerofustis;s__
OTU_1195	0	0	4	0	4	0	0	1	2	k__Bacteria;p__Bacteroidota;c__Bacteroidia;o__Bacteroidales;f__Muribaculaceae;g__;s__
OTU_1196	1	0	0	1	1	0	0	2	1	k__Bacteria;p__Firmicutes;c__Negativicutes;o__Veillonellales-Selenomonadales;f__Veillonellaceae;g__Veillonella
OTU_1197	0	0	1	0	0	0	1	0	0	k__Bacteria;p__Firmicutes;c__Bacilli;o__RF39;f__;g__;s__
OTU_1198	2	0	6	6	3	0	5	3	0	k__Bacteria;p__Bacteroidota;c__Bacteroidia;o__Bacteroidales;f__Muribaculaceae;g__;s__
OTU_1199	6	0	4	2	5	109	3	0	0	k__Bacteria;p__Bacteroidota;c__Bacteroidia;o__Bacteroidales;f__Rikenellaceae;g__U29-B03;s__
OTU_1200	0	0	0	1	0	0	1	0	0	k__Bacteria;p__unidentified_Bacteria;c__Bacteroidia;o__Bacteroidales;f__Williamwhitmaniaceae;g__;s__
OTU_1201	0	3	0	8	0	0	0	0	0	k__Bacteria;p__Firmicutes;c__Bacilli;o__Erysipelotrichales;f__Erysipelotrichaceae;g__Dubosiella;s__
OTU_1202	0	0	0	2	0	0	0	0	0	Unknown
OTU_1203	1	2	0	0	0	1	0	0	0	k__Bacteria;p__Actinobacteriota;c__Coriobacteriia;o__Coriobacteriales;f__Eggerthellaceae;g__Enterorhabdus;s__
OTU_1204	0	0	0	4	0	2	0	0	0	k__Bacteria;p__Bacteroidota;c__Bacteroidia;o__Bacteroidales;f__Prevotellaceae
OTU_1205	0	0	0	0	0	0	2	0	0	k__Bacteria;p__Bacteroidota;c__Bacteroidia;o__Bacteroidales;f__Prevotellaceae;g__Prevotella;s__
OTU_1206	0	2	0	0	0	0	0	0	0	k__Bacteria;p__Actinobacteriota;c__Coriobacteriia;o__Coriobacteriales;f__Atopobiaceae;g__Atopobium;s__
OTU_1207	1	2	0	0	0	0	0	0	0	k__Bacteria;p__Bacteroidota;c__Bacteroidia;o__Bacteroidales;f__Rikenellaceae;g__Rikenellaceae_RC9_gut_group;s__
OTU_1208	6	8	0	0	0	0	0	0	0	k__Bacteria;p__Bacteroidota;c__Bacteroidia;o__Bacteroidales;f__Prevotellaceae;g__Prevotella
OTU_1209	0	1	1	1	0	1	0	0	0	k__Bacteria;p__Firmicutes;c__Clostridia;o__Oscillospirales;f__Oscillospiraceae
OTU_1210	1	1	1	1	0	0	1	1	0	k__Bacteria;p__unidentified_Bacteria;c__Clostridia;o__Peptococcales;f__Peptococcaceae;g__;s__
OTU_1211	3	3	3	0	1	1	0	0	0	k__Bacteria;p__Firmicutes;c__Clostridia;o__Oscillospirales;f__UCG-010;g__;s__
OTU_1212	0	2	0	0	0	0	0	0	0	k__Bacteria;p__Firmicutes;c__Clostridia;o__Peptostreptococcales-Tissierellales
OTU_1213	0	0	0	0	0	5	0	0	0	k__Bacteria;p__Firmicutes;c__Clostridia;o__Christensenellales;f__Christensenellaceae;g__Christensenellaceae_R-7_group
OTU_1214	0	0	0	0	0	0	0	2	0	k__Bacteria;p__unidentified_Bacteria;c__Clostridia;o__Peptococcales;f__Peptococcaceae;g__;s__
OTU_1215	0	5	0	0	0	0	0	0	0	k__Bacteria;p__Bacteroidota;c__Bacteroidia;o__Bacteroidales;f__Prevotellaceae;g__Prevotella;s__
OTU_1216	4	0	0	4	8	33	5	14	2	k__Bacteria;p__Firmicutes;c__Clostridia;o__Lachnospirales;f__Lachnospiraceae;g__Blautia
OTU_1217	2	0	0	0	0	0	0	0	0	k__Bacteria;p__Bacteroidota;c__Bacteroidia;o__Bacteroidales;f__F082;g__;s__
OTU_1218	1	4	8	1	0	0	0	0	0	k__Bacteria;p__Bacteroidota;c__Bacteroidia;o__Bacteroidales;f__Rikenellaceae;g__Rikenellaceae_RC9_gut_group;s__
OTU_1219	0	1	0	0	0	0	0	0	1	k__Bacteria;p__Rs-K70_termite_group;c__;o__;f__;g__;s__
OTU_1220	3	4	2	1	0	22	2	5	6	k__Bacteria;p__Firmicutes;c__Clostridia;o__Clostridia_UCG-014;f__;g__;s__
OTU_1221	0	1	0	0	1	1	0	0	0	k__Bacteria;p__Firmicutes;c__Clostridia;o__Oscillospirales
OTU_1222	3	0	4	1	2	0	0	0	0	k__Bacteria;p__Firmicutes;c__Clostridia;o__Oscillospirales;f__Ruminococcaceae;g__[Eubacterium]_siraeum_group;s__
OTU_1223	0	0	16	0	3	0	0	0	0	k__Bacteria;p__Firmicutes;c__Negativicutes;o__Veillonellales-Selenomonadales;f__Selenomonadaceae;g__Anaerovibrio
OTU_1224	1	0	0	0	0	0	0	0	1	k__Bacteria;p__Bacteroidota;c__Bacteroidia;o__Bacteroidales;f__Marinifilaceae;g__Butyricimonas
OTU_1225	2	3	0	1	0	0	0	0	0	k__Bacteria;p__Bacteroidota;c__Bacteroidia;o__Bacteroidales;f__Rikenellaceae;g__Rikenellaceae_RC9_gut_group;s__
OTU_1226	0	0	0	0	0	0	2	0	0	k__Bacteria
OTU_1227	0	0	2	0	0	0	0	0	0	k__Bacteria
OTU_1228	0	1	0	0	1	0	0	0	0	k__Bacteria;p__Proteobacteria;c__Gammaproteobacteria;o__Burkholderiales;f__Sutterellaceae;g__Parasutterella
OTU_1229	0	0	0	0	0	0	3	0	0	k__Bacteria;p__Firmicutes;c__Clostridia;o__Lachnospirales;f__Lachnospiraceae
OTU_1230	1	17	1	134	1	11	12	2	13	k__Bacteria;p__unidentified_Bacteria;c__Alphaproteobacteria;o__Rhodospirillales;f__;g__;s__
OTU_1231	0	1	0	2	1	0	1	0	2	k__Bacteria
OTU_1232	0	2	0	0	0	0	0	0	0	k__Bacteria;p__Bacteroidota;c__Bacteroidia;o__Bacteroidales;f__F082;g__unidentified_F082;s__Bacteroidales_bacterium_Bact_22
OTU_1233	1	0	0	0	1	0	0	0	4	k__Bacteria;p__Bacteroidota;c__Bacteroidia;o__Bacteroidales;f__F082;g__;s__
OTU_1234	0	0	0	0	0	1	1	0	2	k__Bacteria;p__Firmicutes;c__Clostridia;o__Lachnospirales;f__Lachnospiraceae;g__Roseburia
OTU_1235	8	2	0	0	0	0	0	0	0	k__Bacteria;p__Firmicutes;c__Clostridia;o__Oscillospirales;f__Oscillospiraceae
OTU_1236	1	4	0	0	1	1	0	1	0	k__Bacteria;p__Firmicutes;c__Clostridia;o__Lachnospirales;f__Lachnospiraceae;g__Blautia
OTU_1237	0	0	0	0	0	0	14	0	1	k__Bacteria;p__Bacteroidota;c__Bacteroidia;o__Bacteroidales;f__Prevotellaceae;g__Prevotella;s__
OTU_1238	0	3	0	3	0	0	0	1	0	k__Bacteria;p__Bacteroidota;c__Bacteroidia;o__Bacteroidales;f__Prevotellaceae;g__Prevotellaceae_UCG-001;s__
OTU_1239	0	0	2	0	0	0	0	0	0	k__Bacteria
OTU_1240	0	0	1	2	0	2	0	0	0	k__Bacteria
OTU_1241	1	1	0	0	2	2	0	0	0	k__Bacteria;p__Proteobacteria;c__Gammaproteobacteria;o__Aeromonadales;f__Succinivibrionaceae;g__Succinivibrio
OTU_1242	0	0	0	0	0	0	0	2	0	k__Bacteria;p__Firmicutes;c__Clostridia
OTU_1243	2	0	0	0	0	0	0	0	0	k__Bacteria;p__Firmicutes;c__Clostridia;o__Christensenellales;f__Christensenellaceae;g__Christensenellaceae_R-7_group;s__
OTU_1244	0	0	1	0	2	1	0	1	0	k__Bacteria;p__Firmicutes;c__Clostridia;o__Oscillospirales;f__Ruminococcaceae;g__Harryflintia;s__
OTU_1245	1	4	1	2	1	0	0	1	0	k__Bacteria
OTU_1246	0	2	1	0	0	0	0	0	0	k__Bacteria;p__Firmicutes;c__Clostridia
OTU_1247	0	0	0	2	0	0	0	0	0	k__Bacteria;p__Firmicutes;c__Clostridia;o__Clostridia_vadinBB60_group;f__;g__;s__
OTU_1248	0	0	0	0	0	0	0	2	0	Unknown
OTU_1249	1	1	4	1	0	0	0	0	1	k__Bacteria;p__Bacteroidota;c__Bacteroidia;o__Bacteroidales;f__Muribaculaceae;g__;s__
OTU_1250	0	0	0	0	0	0	2	2	0	k__Bacteria;p__Firmicutes;c__Clostridia;o__Peptostreptococcales-Tissierellales;f__Anaerovoracaceae;g__[Eubacterium]_nodatum_group;s__Eubacterium_pyruvativorans
OTU_1251	0	0	2	0	0	0	0	0	0	k__Bacteria;p__Firmicutes;c__Clostridia;o__Lachnospirales;f__Lachnospiraceae
OTU_1252	0	2	0	0	0	0	0	0	0	k__Bacteria;p__Proteobacteria;c__Gammaproteobacteria;o__Burkholderiales;f__Burkholderiaceae;g__Lautropia
OTU_1253	0	0	5	0	1	0	0	0	0	k__Bacteria;p__Firmicutes;c__Clostridia;o__Christensenellales;f__Christensenellaceae;g__Christensenellaceae_R-7_group;s__
OTU_1254	0	0	0	0	0	0	2	0	0	k__Bacteria;p__Firmicutes;c__Clostridia;o__Lachnospirales;f__Lachnospiraceae
OTU_1255	1	1	2	2	0	1	0	0	0	k__Bacteria;p__Firmicutes;c__Clostridia;o__Oscillospirales;f__Ruminococcaceae;g__Anaerotruncus;s__
OTU_1256	1	0	0	2	0	0	0	0	0	k__Bacteria;p__Bacteroidota;c__Bacteroidia;o__Bacteroidales;f__Rikenellaceae;g__Alistipes;s__Alistipes_sp_cv1
OTU_1257	0	3	6	1	2	5	6	1	0	k__Bacteria;p__unidentified_Bacteria;c__Saccharimonadia;o__Saccharimonadales;f__Saccharimonadaceae;g__Candidatus_Saccharimonas;s__
OTU_1258	3	8	3	5	1	0	0	1	8	k__Bacteria;p__Firmicutes;c__Clostridia;o__Oscillospirales;f__Oscillospiraceae;g__Oscillibacter;s__
OTU_1259	1	1	0	2	0	0	0	1	0	k__Bacteria;p__Firmicutes;c__Clostridia;o__Clostridia_vadinBB60_group;f__;g__;s__
OTU_1260	29	6	17	7	4	45	3	10	0	k__Bacteria;p__Firmicutes;c__Clostridia;o__Oscillospirales;f__Oscillospiraceae;g__UCG-005;s__
OTU_1261	0	0	2	0	0	0	0	1	0	k__Bacteria;p__Firmicutes;c__Clostridia
OTU_1262	0	0	0	0	0	2	0	0	0	k__Bacteria;p__Bacteroidota;c__Bacteroidia;o__Bacteroidales;f__Prevotellaceae
OTU_1263	0	0	0	0	0	0	17	0	0	k__Bacteria;p__Bacteroidota;c__Bacteroidia;o__Bacteroidales;f__Prevotellaceae;g__Prevotella;s__
OTU_1264	0	0	0	0	0	0	2	0	3	k__Bacteria;p__Bacteroidota;c__Bacteroidia;o__Bacteroidales;f__F082
OTU_1265	9	6	14	4	4	51	2	11	0	k__Bacteria;p__Firmicutes;c__Clostridia;o__Lachnospirales;f__Lachnospiraceae
OTU_1266	0	3	4	5	3	1	0	1	4	k__Bacteria;p__unidentified_Bacteria;c__Clostridia;o__Lachnospirales;f__Lachnospiraceae
OTU_1267	4	0	0	2	1	0	1	0	0	k__Bacteria;p__Firmicutes;c__Bacilli;o__RF39;f__;g__;s__
OTU_1268	0	0	0	0	0	2	5	0	0	k__Bacteria;p__Firmicutes;c__Clostridia;o__Lachnospirales;f__Lachnospiraceae
OTU_1269	6	4	10	2	6	1	0	6	2	k__Bacteria;p__Firmicutes;c__Clostridia;o__Oscillospirales;f__Oscillospiraceae
OTU_1270	3	6	0	2	0	0	0	1	1	k__Bacteria;p__unidentified_Bacteria;c__Clostridia;o__Lachnospirales;f__Lachnospiraceae;g__;s__
OTU_1271	4	0	6	0	3	0	2	6	0	k__Bacteria
OTU_1272	0	1	0	0	1	0	1	0	0	k__Bacteria;p__Firmicutes;c__Bacilli;o__RF39;f__;g__;s__
OTU_1273	0	1	1	0	0	0	0	1	1	k__Bacteria;p__Firmicutes;c__Clostridia;o__Lachnospirales;f__Defluviitaleaceae;g__Defluviitaleaceae_UCG-011;s__
OTU_1274	0	0	0	0	0	3	0	0	0	k__Bacteria;p__Proteobacteria;c__Gammaproteobacteria;o__Pseudomonadales;f__Pseudomonadaceae;g__Pseudomonas;s__Pseudomonas_rhizosphaerae
OTU_1275	1	2	0	0	0	0	0	0	0	k__Bacteria
OTU_1276	0	1	0	0	1	1	1	3	0	k__Bacteria;p__unidentified_Bacteria;c__Alphaproteobacteria;o__Rhodospirillales;f__;g__;s__
OTU_1277	0	0	0	0	0	1	0	3	0	k__Bacteria;p__Firmicutes;c__Clostridia;o__Lachnospirales;f__Lachnospiraceae
OTU_1278	12	3	11	2	6	8	3	15	3	k__Bacteria;p__Firmicutes;c__Clostridia;o__Christensenellales;f__Christensenellaceae;g__Christensenellaceae_R-7_group
OTU_1279	0	0	0	0	2	0	0	0	0	k__Bacteria
OTU_1280	0	0	0	0	2	1	2	0	0	k__Bacteria;p__Firmicutes;c__Bacilli;o__RF39;f__;g__;s__
OTU_1281	21	7	289	20	10	7	200	11	3	k__Bacteria;p__Firmicutes;c__Clostridia;o__Christensenellales;f__Christensenellaceae;g__Christensenellaceae_R-7_group;s__
OTU_1282	1	1	0	0	0	2	0	0	0	k__Bacteria;p__Firmicutes;c__Bacilli;o__RF39;f__;g__;s__
OTU_1283	1	0	5	2	7	0	4	1	0	k__Bacteria;p__Firmicutes;c__Bacilli;o__Erysipelotrichales;f__Erysipelatoclostridiaceae;g__Erysipelatoclostridium;s__Clostridiales_bacterium_CHKCI006
OTU_1284	2	1	0	0	1	0	1	0	0	k__Bacteria;p__Firmicutes;c__Clostridia;o__Oscillospirales;f__UCG-010;g__;s__
OTU_1285	2	0	0	2	3	0	2	0	3	k__Bacteria;p__Firmicutes;c__Clostridia;o__Lachnospirales;f__Lachnospiraceae
OTU_1286	0	0	1	0	0	5	2	0	0	k__Bacteria;p__Proteobacteria;c__Gammaproteobacteria;o__Pseudomonadales;f__Pseudomonadaceae;g__Pseudomonas
OTU_1287	8	0	0	1	0	0	0	0	1	k__Bacteria;p__Bacteroidota;c__Bacteroidia;o__Bacteroidales;f__Rikenellaceae;g__Rikenellaceae_RC9_gut_group;s__
OTU_1288	2	0	2	1	1	0	0	1	0	k__Bacteria;p__Firmicutes;c__Bacilli;o__Erysipelotrichales;f__Erysipelotrichaceae;g__Holdemania;s__
OTU_1289	5	0	0	0	0	0	0	0	0	k__Bacteria;p__Bacteroidota;c__Bacteroidia;o__Bacteroidales;f__F082;g__;s__
OTU_1290	0	0	0	0	0	2	0	0	0	k__Bacteria;p__Firmicutes;c__Clostridia
OTU_1291	0	0	2	0	0	0	0	0	0	k__Bacteria;p__Firmicutes;c__Clostridia
OTU_1292	18	1	1	0	3	0	0	0	0	k__Bacteria;p__Firmicutes;c__Clostridia;o__Monoglobales;f__Monoglobaceae;g__Monoglobus;s__
OTU_1293	0	0	0	0	0	1	0	2	0	k__Bacteria
OTU_1294	0	0	0	0	0	0	2	0	0	k__Bacteria;p__Spirochaetota;c__Spirochaetia;o__Spirochaetales;f__Spirochaetaceae;g__Treponema;s__Treponema_bryantii
OTU_1295	0	0	0	0	0	0	0	2	1	k__Bacteria;p__Desulfobacterota;c__Desulfovibrionia;o__Desulfovibrionales;f__Desulfovibrionaceae;g__Desulfovibrio;s__bacterium_'New_Zealand_D'
OTU_1296	0	0	1	2	0	1	1	0	0	k__Bacteria;p__Firmicutes;c__Clostridia;o__Lachnospirales;f__Lachnospiraceae;g__A2;s__
OTU_1297	0	0	0	3	0	0	1	0	2	k__Bacteria;p__Firmicutes;c__Bacilli;o__Erysipelotrichales;f__Erysipelotrichaceae
OTU_1298	0	0	0	0	0	0	2	0	0	k__Bacteria;p__Bacteroidota;c__Bacteroidia;o__Bacteroidales;f__Prevotellaceae
OTU_1299	0	0	0	0	0	1	2	0	0	k__Bacteria;p__Firmicutes;c__Clostridia;o__Lachnospirales;f__Lachnospiraceae;g__Syntrophococcus;s__
OTU_1300	0	0	0	3	0	0	0	0	0	Unknown
OTU_1301	1	1	8	1	0	0	1	0	0	k__Bacteria;p__Bacteroidota;c__Bacteroidia;o__Bacteroidales;f__Muribaculaceae;g__;s__
OTU_1302	0	0	0	2	0	0	0	0	0	Unknown
OTU_1303	0	3	0	0	0	0	0	0	0	k__Bacteria;p__Firmicutes;c__Bacilli;o__Bacillales;f__Planococcaceae;g__Sporosarcina;s__Sporosarcina_pasteurii
OTU_1304	1	0	0	0	0	1	0	0	0	k__Bacteria;p__Firmicutes;c__Clostridia;o__Lachnospirales;f__Lachnospiraceae
OTU_1305	1	1	0	1	1	0	1	0	1	k__Bacteria
OTU_1306	0	0	0	0	0	5	0	0	0	k__Bacteria;p__Proteobacteria;c__Gammaproteobacteria;o__Burkholderiales;f__Oxalobacteraceae;g__Oxalobacter;s__Oxalobacter_formigenes
OTU_1307	2	0	0	0	0	0	0	0	0	k__Bacteria;p__Bacteroidota;c__Bacteroidia;o__Bacteroidales
OTU_1308	0	0	0	0	0	9	0	0	0	k__Bacteria;p__Bacteroidota;c__Bacteroidia;o__Bacteroidales;f__Barnesiellaceae;g__Coprobacter;s__
OTU_1309	0	0	0	0	0	0	0	2	0	k__Bacteria;p__Bacteroidota;c__Bacteroidia;o__Bacteroidales
OTU_1310	0	0	0	2	0	0	0	0	0	Unknown
OTU_1311	0	0	0	0	0	2	0	0	0	k__Bacteria;p__Firmicutes;c__Clostridia;o__Oscillospirales;f__Ruminococcaceae
OTU_1312	2	0	0	0	0	0	0	0	0	k__Bacteria;p__Firmicutes
OTU_1313	0	0	0	0	0	0	0	2	0	k__Bacteria;p__Cyanobacteria;c__Vampirivibrionia;o__Gastranaerophilales
OTU_1314	0	1	0	0	0	0	0	1	0	k__Bacteria;p__Proteobacteria;c__Gammaproteobacteria;o__Burkholderiales;f__Neisseriaceae;g__Conchiformibius
OTU_1315	4	0	0	0	1	0	0	0	0	k__Bacteria;p__Bacteroidota;c__Bacteroidia;o__Bacteroidales;f__Prevotellaceae;g__Prevotella
OTU_1316	2	2	0	0	0	0	0	0	0	k__Bacteria;p__Spirochaetota;c__Spirochaetia;o__Spirochaetales;f__Spirochaetaceae;g__Treponema
OTU_1317	0	0	0	4	0	0	0	0	1	k__Bacteria;p__Actinobacteriota;c__Coriobacteriia;o__Coriobacteriales;f__Eggerthellaceae;g__Gordonibacter;s__
OTU_1318	0	0	0	3	0	0	0	0	0	Unknown
OTU_1319	0	0	0	0	0	0	0	0	3	k__Bacteria;p__Bacteroidota;c__Bacteroidia;o__Bacteroidales;f__Prevotellaceae;g__Prevotella
OTU_1320	0	0	0	2	0	0	0	0	0	k__Bacteria;p__Firmicutes;c__Clostridia
OTU_1321	0	0	0	0	6	0	0	0	0	k__Bacteria;p__Firmicutes;c__Clostridia;o__Oscillospirales;f__Ruminococcaceae;g__CAG-352;s__
OTU_1322	2	0	0	1	0	0	0	0	0	k__Bacteria;p__Firmicutes;c__Clostridia;o__Oscillospirales;f__UCG-010;g__;s__
OTU_1323	0	0	0	0	0	3	0	0	0	k__Bacteria;p__Firmicutes;c__Clostridia;o__Oscillospirales;f__Oscillospiraceae
OTU_1324	0	2	0	0	0	0	0	0	0	k__Bacteria;p__Bacteroidota;c__Bacteroidia;o__Bacteroidales;f__Prevotellaceae;g__Prevotellaceae_UCG-001;s__
OTU_1325	13	2	6	1	3	18	1	6	1	k__Bacteria
OTU_1326	1	4	0	4	1	0	0	0	2	k__Bacteria;p__Firmicutes;c__Clostridia;o__Lachnospirales;f__Lachnospiraceae;g__Lachnospiraceae_NK4A136_group;s__
OTU_1327	7	17	13	9	8	4	4	5	7	k__Bacteria;p__Firmicutes;c__Clostridia;o__Oscillospirales;f__Oscillospiraceae;g__NK4A214_group;s__
OTU_1328	0	0	0	0	0	0	0	4	1	k__Bacteria;p__Actinobacteriota;c__Actinobacteria;o__Bifidobacteriales;f__Bifidobacteriaceae;g__Bifidobacterium;s__Bifidobacterium_adolescentis
OTU_1329	1	1	3	0	0	1	0	2	0	k__Bacteria;p__Firmicutes;c__Clostridia;o__Clostridia_vadinBB60_group
OTU_1330	0	0	0	0	0	0	0	0	2	k__Bacteria;p__Bacteroidota;c__Bacteroidia;o__Bacteroidales;f__Rikenellaceae;g__Rikenellaceae_RC9_gut_group
OTU_1331	0	2	0	0	0	0	0	0	0	k__Bacteria;p__Bacteroidota;c__Bacteroidia;o__Bacteroidales
OTU_1332	0	1	17	0	3	1	4	12	1	k__Bacteria;p__Bacteroidota;c__Bacteroidia;o__Bacteroidales;f__Prevotellaceae;g__Prevotellaceae_UCG-003;s__
OTU_1333	2	1	0	1	0	0	0	1	0	k__Bacteria;p__Bacteroidota;c__Bacteroidia;o__Bacteroidales;f__Muribaculaceae;g__;s__
OTU_1334	0	0	7	0	0	0	0	0	0	k__Bacteria;p__Cyanobacteria;c__Vampirivibrionia;o__Gastranaerophilales;f__;g__;s__
OTU_1335	1	4	1	0	0	0	1	0	0	k__Bacteria;p__Firmicutes;c__Clostridia;o__Clostridia_vadinBB60_group;f__;g__;s__

## Sheet: Supplemental Table S4
Supplemental Table S4 Alpha Diversity
Sample Name	observed_species	shannon	simpson	chao1	ACE	goods_coverage	PD_whole_tree
Control1	813	5.779	0.925	887.378	891.691	0.997	66.934
Control2	881	7.06	0.973	895.218	913.552	0.998	69.404
Control3	832	5.756	0.927	891.226	917.356	0.997	73.236
SIF1-1	849	6.368	0.951	939.652	938.437	0.996	68.02
SIF1-2	754	5.335	0.914	823.731	864.773	0.996	53.648
SIF1-3	818	6.214	0.949	892.275	915.878	0.997	55.944
SIF2-1	731	5.212	0.909	807.917	836.865	0.996	53.808
SIF2-2	774	4.871	0.802	823.689	856.032	0.997	63.786
SIF2-3	660	4.492	0.869	769.532	765.817	0.996	49.812

## Sheet: Supplemental Table S5
Supplemental Table S5 Microbial composition at phylum level
Taxonomy	Control1	Control2	Control3	SIF1-1	SIF1-2	SIF1-3	SIF2-1	SIF2-2	SIF2-3	Tax_detail
Bacteroidota	0.393546	0.394621	0.259923	0.431564	0.346906	0.239777	0.443436	0.279519	0.54759	k__Bacteria;p__Bacteroidota;
Firmicutes	0.287118	0.490302	0.489477	0.438887	0.228154	0.318061	0.320011	0.242776	0.140997	k__Bacteria;p__Firmicutes;
Proteobacteria	0.221256	0.0136223	0.200935	0.0329184	0.370701	0.270621	0.196436	0.441462	0.237353	k__Bacteria;p__Proteobacteria;
Spirochaetota	0.0638122	0.0342432	0.00469906	0.0308688	0.0217207	0.118226	0.015072	0.0138222	0.0168716	k__Bacteria;p__Spirochaetota;
unidentified_Bacteria	0.0115977	0.0406919	0.0262448	0.0359428	0.0164217	0.0183963	0.00807339	0.00822336	0.00944811	k__Bacteria;p__unidentified_Bacteria;
Cyanobacteria	0.00612378	0.00587383	0.00237453	0.00927315	0.00484903	0.00994801	0.0020246	0.00229954	0.0352929	k__Bacteria;p__Cyanobacteria;
Desulfobacterota	0.00472406	0.00567387	0.00277445	0.00197461	0.00234953	0.00389922	0.00174965	0.00157469	0.00117477	k__Bacteria;p__Desulfobacterota;
Verrucomicrobiota	0.00044991	0.00089982	0.000424915	0.00119976	0.00094981	0.005024	0.00134973	0.00069986	0.0014997	k__Bacteria;p__Verrucomicrobiota;
Elusimicrobia	0.000474905	0.00084983	0.00029994	0.0039992	0.00054989	0.000124975	7.4985e-05	0.00014997	0.000524895	k__Bacteria;p__Elusimicrobia;
Campilobacterota	0.0015247	0.00222456	0.00117477	0.00079984	0.00187463	0.000774845	0.00339932	0.00364927	0.0009998	k__Bacteria;p__Campilobacterota;
Actinobacteriota	0.000874825	0.0025245	0.00064987	0.000624875	0.000674865	0.000674865	0.000374925	0.00134973	0.00029994	k__Bacteria;p__Actinobacteriota;
Thermoplasmatota	4.999e-05	0	4.999e-05	0.00114977	0	0.000424915	0	0.000124975	0.00112478	k__Archaea;p__Thermoplasmatota;
Synergistota	0.000224955	0.00039992	0.00107479	0.00019996	4.999e-05	9.998e-05	0.00034993	0.000274945	0.000424915	k__Bacteria;p__Synergistota;
Euryarchaeota	0	0.00024995	9.998e-05	7.4985e-05	0.000124975	0	0.00064987	7.4985e-05	0.000474905	k__Archaea;p__Euryarchaeota;
Gracilibacteria	2.4995e-05	0.000174965	0	0.000274945	0	0	9.998e-05	4.999e-05	0.000474905	k__Bacteria;p__Gracilibacteria;
unidentified_Archaea	0	0	0	0	0	0	0	0.000324935	0.000374925	k__Archaea;p__unidentified_Archaea;
Rs-K70_termite_group	0	4.999e-05	0	0	0	0	0	0	7.4985e-05	k__Bacteria;p__Rs-K70_termite_group;
Fusobacteriota	0	0	0	0	0	0	0	4.999e-05	0	k__Bacteria;p__Fusobacteriota;
Others	0.00819836	0.00759848	0.00979804	0.010248	0.00467407	0.0139472	0.00689862	0.00357429	0.004999	Others

## Sheet: Supplemental Table S6
Supplemental Table S6 Microbial composition at genus level
Taxonomy	Control1	Control2	Control3	SIF1-1	SIF1-2	SIF1-3	SIF2-1	SIF2-2	SIF2-3	Tax_detail
Succinivibrio	0.219381	0.0117477	0.19836	0.0312438	0.316587	0.268146	0.188112	0.439612	0.235478	k__Bacteria;p__Proteobacteria;c__Gammaproteobacteria;o__Aeromonadales;f__Succinivibrionaceae;g__Succinivibrio;
Prevotella	0.242651	0.217282	0.181514	0.283668	0.0627375	0.0670866	0.0923315	0.0293941	0.267971	k__Bacteria;p__Bacteroidota;c__Bacteroidia;o__Bacteroidales;f__Prevotellaceae;g__Prevotella;
unidentified_F082	0.0504399	0.0338932	0.00207459	0.0126475	0.0568386	0.00917317	0.0871076	0.0284693	0.184838	k__Bacteria;p__Bacteroidota;c__Bacteroidia;o__Bacteroidales;f__F082;g__unidentified_F082;
Christensenellaceae_R-7_group	0.0392671	0.0356929	0.171141	0.0340432	0.0175965	0.0189462	0.0179964	0.0304939	0.00869826	k__Bacteria;p__Firmicutes;c__Clostridia;o__Christensenellales;f__Christensenellaceae;g__Christensenellaceae_R-7_group;
Treponema	0.0634623	0.0336933	0.0040242	0.0306439	0.0136473	0.10193	0.0147471	0.0134973	0.0164217	k__Bacteria;p__Spirochaetota;c__Spirochaetia;o__Spirochaetales;f__Spirochaetaceae;g__Treponema;
Lachnospiraceae_XPB1014_group	0.00404919	0.00447411	0.0116477	0.0456159	0.00382424	0.054764	0.0985053	0.00604879	0.00189962	k__Bacteria;p__Firmicutes;c__Clostridia;o__Lachnospirales;f__Lachnospiraceae;g__Lachnospiraceae_XPB1014_group;
Ruminococcus	0.0296941	0.0657369	0.0345931	0.0910068	0.0365177	0.0246701	0.0122226	0.0192961	0.0104979	k__Bacteria;p__Firmicutes;c__Clostridia;o__Oscillospirales;f__Ruminococcaceae;g__Ruminococcus;
Saccharofermentans	0.00672366	0.0766597	0.0166467	0.0219706	0.00639872	0.00307439	0.0287443	0.00629874	0.0120726	k__Bacteria;p__Firmicutes;c__Clostridia;o__unidentified_Clostridia;f__Hungateiclostridiaceae;g__Saccharofermentans;
Prevotellaceae_UCG-001	0.00342432	0.0213957	0.0115977	0.0183713	0.0171466	0.0688862	0.0103979	0.0175215	0.00292442	k__Bacteria;p__Bacteroidota;c__Bacteroidia;o__Bacteroidales;f__Prevotellaceae;g__Prevotellaceae_UCG-001;
Rikenellaceae_RC9_gut_group	0.0429414	0.0531144	0.0222955	0.0476905	0.0614377	0.0187712	0.0435663	0.0633123	0.0134473	k__Bacteria;p__Bacteroidota;c__Bacteroidia;o__Bacteroidales;f__Rikenellaceae;g__Rikenellaceae_RC9_gut_group;
Lachnospiraceae_NK4A136_group	0.00717357	0.00787343	0.00654869	0.0621876	0.00922316	0.00364927	0.00189962	0.00497401	0.00127475	k__Bacteria;p__Firmicutes;c__Clostridia;o__Lachnospirales;f__Lachnospiraceae;g__Lachnospiraceae_NK4A136_group;
Ruminobacter	0.000974805	0.000674865	0.00119976	0.0009998	0.0517646	0.00154969	0.00717357	0.00079984	0.0009998	k__Bacteria;p__Proteobacteria;c__Gammaproteobacteria;o__Aeromonadales;f__Succinivibrionaceae;g__Ruminobacter;
UCG-002	0.0194211	0.0264197	0.0295441	0.00674865	0.0210958	0.0372426	0.010073	0.0222456	0.00724855	k__Bacteria;p__Firmicutes;c__Clostridia;o__Oscillospirales;f__Oscillospiraceae;g__UCG-002;
Butyrivibrio	0.0130474	0.0187463	0.0326935	0.014822	0.00732354	0.00672366	0.0109978	0.00369926	0.00877325	k__Bacteria;p__Firmicutes;c__Clostridia;o__Lachnospirales;f__Lachnospiraceae;g__Butyrivibrio;
UCG-005	0.0177215	0.0161968	0.0269196	0.0159968	0.0113977	0.0138472	0.0166967	0.0296941	0.00539892	k__Bacteria;p__Firmicutes;c__Clostridia;o__Oscillospirales;f__Oscillospiraceae;g__UCG-005;
NK4A214_group	0.0135973	0.0233953	0.0152969	0.0129224	0.00604879	0.0112977	0.00627375	0.0105229	0.0060238	k__Bacteria;p__Firmicutes;c__Clostridia;o__Oscillospirales;f__Oscillospiraceae;g__NK4A214_group;
Succiniclasticum	0.0108228	0.0197461	0.0105729	0.00622376	0.0119726	0.0145471	0.0106979	0.0019996	0.00532394	k__Bacteria;p__Firmicutes;c__Negativicutes;o__Acidaminococcales;f__Acidaminococcaceae;g__Succiniclasticum;
Sphaerochaeta	0.00024995	0.00054989	0.000474905	0.00014997	0.00804839	0.0160718	0.000274945	0.000324935	0.000274945	k__Bacteria;p__Spirochaetota;c__Spirochaetia;o__Spirochaetales;f__Spirochaetaceae;g__Sphaerochaeta;
Clostridium_sensu_stricto_1	0.0146721	0.00484903	0.000474905	0.00339932	0.00139972	0.0079984	0.00174965	0.0014997	0.00054989	k__Bacteria;p__Firmicutes;c__Clostridia;o__Clostridiales;f__Clostridiaceae;g__Clostridium_sensu_stricto_1;
[Eubacterium]_ruminantium_group	0.00657369	0.00664867	0.0127974	0.00897321	0.00289942	0.00257449	0.0034993	0.00612378	0.00284943	k__Bacteria;p__Firmicutes;c__Clostridia;o__Lachnospirales;f__Lachnospiraceae;g__[Eubacterium]_ruminantium_group;
Romboutsia	0.0121226	0.0115977	0.00324935	0.0111728	0.00647371	0.00712358	0.0118976	0.00662368	0.00264947	k__Bacteria;p__Firmicutes;c__Clostridia;o__Peptostreptococcales-Tissierellales;f__Peptostreptococcaceae;g__Romboutsia;
Lactobacillus	0.00337433	0.00592382	0.00697361	0.00497401	0.0104979	0.00254949	0.0108978	0.00444911	0.00242452	k__Bacteria;p__Firmicutes;c__Bacilli;o__Lactobacillales;f__Lactobacillaceae;g__Lactobacillus;
Lachnospiraceae_NK3A20_group	0.00069986	0.0010248	0.00162468	0.0015247	0.009998	0.00154969	0.00144971	0.0019996	0.000774845	k__Bacteria;p__Firmicutes;c__Clostridia;o__Lachnospirales;f__Lachnospiraceae;g__Lachnospiraceae_NK3A20_group;
Colidextribacter	0.00317437	0.0019996	0.00867327	0.00134973	0.00089982	0.00242452	0.00129974	0.000874825	0.00069986	k__Bacteria;p__Firmicutes;c__Clostridia;o__Oscillospirales;f__Oscillospiraceae;g__Colidextribacter;
Prevotellaceae_UCG-003	0.00159968	0.00304939	0.00547391	0.00089982	0.0010248	0.00847331	0.00264947	0.00222456	0.00209958	k__Bacteria;p__Bacteroidota;c__Bacteroidia;o__Bacteroidales;f__Prevotellaceae;g__Prevotellaceae_UCG-003;
CAG-352	0.000674865	0.000774845	0.000724855	0.00304939	0.00192462	0.00244951	0.00064987	0.00804839	0.00114977	k__Bacteria;p__Firmicutes;c__Clostridia;o__Oscillospirales;f__Ruminococcaceae;g__CAG-352;
Megasphaera	0.00014997	0.00014997	9.998e-05	0.00014997	9.998e-05	4.999e-05	0.00039992	0.00139972	0.00804839	k__Bacteria;p__Firmicutes;c__Negativicutes;o__Veillonellales-Selenomonadales;f__Veillonellaceae;g__Megasphaera;
Alloprevotella	0.00469906	0.00404919	0.00219956	0.0079984	0.00134973	0.000874825	0.00019996	0.00112478	0.00182464	k__Bacteria;p__Bacteroidota;c__Bacteroidia;o__Bacteroidales;f__Prevotellaceae;g__Alloprevotella;
U29-B03	0.000824835	0.00237453	0.00079984	7.4985e-05	0.000324935	0.00772346	0.000474905	0.000424915	0.00142472	k__Bacteria;p__Bacteroidota;c__Bacteroidia;o__Bacteroidales;f__Rikenellaceae;g__U29-B03;
Pseudobutyrivibrio	0.00184963	0.00384923	0.00767347	0.00282444	0.00137473	0.0015247	0.00197461	0.00107479	0.00084983	k__Bacteria;p__Firmicutes;c__Clostridia;o__Lachnospirales;f__Lachnospiraceae;g__Pseudobutyrivibrio;
Bacteroides	0.0015247	0.00197461	0.00122476	0.00164967	0.000374925	0.00627375	0.00079984	0.00297441	0.000324935	k__Bacteria;p__Bacteroidota;c__Bacteroidia;o__Bacteroidales;f__Bacteroidaceae;g__Bacteroides;
Monoglobus	0.00344931	0.00562388	0.00124975	0.00122476	0.000774845	0.00177465	0.000474905	0.00192462	0.00107479	k__Bacteria;p__Firmicutes;c__Clostridia;o__Monoglobales;f__Monoglobaceae;g__Monoglobus;
Prevotellaceae_UCG-004	0.00204959	0.00369926	0.00407419	0.00182464	0.00177465	0.00142472	0.00227455	0.00539892	0.00209958	k__Bacteria;p__Bacteroidota;c__Bacteroidia;o__Bacteroidales;f__Prevotellaceae;g__Prevotellaceae_UCG-004;
Papillibacter	0.0020246	0.00397421	0.00522396	0.00154969	0.00144971	0.00129974	0.00192462	0.00129974	0.00034993	k__Bacteria;p__Firmicutes;c__Clostridia;o__Oscillospirales;f__Oscillospiraceae;g__Papillibacter;
Desulfovibrio	0.0045241	0.00507399	0.00244951	0.00172466	0.00229954	0.00369926	0.00169966	0.00144971	0.000924815	k__Bacteria;p__Desulfobacterota;c__Desulfovibrionia;o__Desulfovibrionales;f__Desulfovibrionaceae;g__Desulfovibrio;
Candidatus_Saccharimonas	0.00039992	0.00497401	0.0025245	0	0.00114977	0.00107479	0.000724855	7.4985e-05	0.0004999	k__Bacteria;p__unidentified_Bacteria;c__Saccharimonadia;o__Saccharimonadales;f__Saccharimonadaceae;g__Candidatus_Saccharimonas;
UCG-004	0.00089982	0.00472406	0.000274945	0.00019996	0.00359928	0.00014997	0.000374925	0.00024995	9.998e-05	k__Bacteria;p__Firmicutes;c__Bacilli;o__Erysipelotrichales;f__Erysipelatoclostridiaceae;g__UCG-004;
Turicibacter	0.00287443	0.00407419	0	0.00224955	0.00139972	0.00194961	0.00174965	0.00237453	0.00019996	k__Bacteria;p__Firmicutes;c__Bacilli;o__Erysipelotrichales;f__Erysipelotrichaceae;g__Turicibacter;
Roseburia	0.000624875	0.00259948	0.00272446	0.00117477	0.000574885	0.00404919	0.000574885	0.00404919	0.0004999	k__Bacteria;p__Firmicutes;c__Clostridia;o__Lachnospirales;f__Lachnospiraceae;g__Roseburia;
Elusimicrobium	0.000474905	0.00084983	0.00029994	0.0039992	0.00054989	0.000124975	7.4985e-05	0.00014997	0.000524895	k__Bacteria;p__Elusimicrobia;c__unidentified_Elusimicrobia;o__Elusimicrobiales;f__Elusimicrobiaceae;g__Elusimicrobium;
Prevotellaceae_NK3B31_group	0.00169966	0.00312438	0.00224955	0.00394921	0.000524895	0.00354929	0.00127475	0.00134973	0.000274945	k__Bacteria;p__Bacteroidota;c__Bacteroidia;o__Bacteroidales;f__Prevotellaceae;g__Prevotellaceae_NK3B31_group;
Anaerovibrio	0.00129974	0.00104979	0.00364927	0.00039992	0.00132474	0.00137473	0.00109978	0.00239952	0.00394921	k__Bacteria;p__Firmicutes;c__Negativicutes;o__Veillonellales-Selenomonadales;f__Selenomonadaceae;g__Anaerovibrio;
Campylobacter	0.00054989	0.00217457	0.000824835	0.00069986	0.00162468	0.000774845	0.00339932	0.00322436	0.00094981	k__Bacteria;p__Campilobacterota;c__Campylobacteria;o__Campylobacterales;f__Campylobacteraceae;g__Campylobacter;
UCG-001	0.000824835	0.00069986	0.00217457	0.00044991	0.000274945	0.00332434	0.000274945	0.00044991	9.998e-05	k__Bacteria;p__Firmicutes;c__Clostridia;o__Oscillospirales;f__Ruminococcaceae;g__UCG-001;
Oscillospira	0.00327435	0.00239952	0.000274945	0.00019996	0.0004999	0.000174965	9.998e-05	4.999e-05	4.999e-05	k__Bacteria;p__Firmicutes;c__Clostridia;o__Oscillospirales;f__Oscillospiraceae;g__Oscillospira;
[Eubacterium]_nodatum_group	0.00224955	0.00179964	0.00137473	0.000974805	0.0010248	0.000874825	0.00319936	0.00282444	0.00234953	k__Bacteria;p__Firmicutes;c__Clostridia;o__Peptostreptococcales-Tissierellales;f__Anaerovoracaceae;g__[Eubacterium]_nodatum_group;
Oscillibacter	0.0010248	0.00292442	0.000674865	0.00122476	0.000424915	0.00112478	0.0004999	0.00039992	0.000274945	k__Bacteria;p__Firmicutes;c__Clostridia;o__Oscillospirales;f__Oscillospiraceae;g__Oscillibacter;
Prevotellaceae_YAB2003_group	4.999e-05	0.00174965	0.00274945	0.000574885	0.00014997	0.000274945	0.0009998	7.4985e-05	0.000374925	k__Bacteria;p__Bacteroidota;c__Bacteroidia;o__Bacteroidales;f__Prevotellaceae;g__Prevotellaceae_YAB2003_group;
Faecalibacterium	4.999e-05	0	2.4995e-05	0	0	0.00244951	0	0.00254949	0	k__Bacteria;p__Firmicutes;c__Clostridia;o__Oscillospirales;f__Ruminococcaceae;g__Faecalibacterium;
probable_genus_10	0.00232454	0.00214957	0.00024995	0.00064987	0.000474905	0.000724855	0.00054989	0.000274945	9.998e-05	k__Bacteria;p__Firmicutes;c__Clostridia;o__Lachnospirales;f__Lachnospiraceae;g__probable_genus_10;
Blautia	0.00039992	0.00107479	0.00024995	0.000674865	0.00094981	0.00174965	0.000724855	0.00217457	0.000174965	k__Bacteria;p__Firmicutes;c__Clostridia;o__Lachnospirales;f__Lachnospiraceae;g__Blautia;
unidentified_Ruminococcaceae	0.00104979	0.0010248	0.00212458	0.00197461	0.000524895	0.000624875	0.00167467	2.4995e-05	0.000924815	k__Bacteria;p__unidentified_Bacteria;c__Clostridia;o__Oscillospirales;f__Ruminococcaceae;g__unidentified_Ruminococcaceae;
Selenomonas	0.000874825	0.00187463	0.00069986	0.0004999	0.00059988	0.00124975	0.00129974	0.000274945	0.0004999	k__Bacteria;p__Firmicutes;c__Negativicutes;o__Veillonellales-Selenomonadales;f__Selenomonadaceae;g__Selenomonas;
UCG-009	0.00169966	0.00107479	0.00064987	0.00172466	0.00074985	0.000524895	0.00014997	0.000574885	0.00039992	k__Bacteria;p__Firmicutes;c__Clostridia;o__Oscillospirales;f__Butyricicoccaceae;g__UCG-009;
Sharpea	9.998e-05	0.00172466	0	0.00014997	4.999e-05	7.4985e-05	0.00019996	0.000424915	0	k__Bacteria;p__Firmicutes;c__Bacilli;o__Erysipelotrichales;f__Erysipelatoclostridiaceae;g__Sharpea;
Fusicatenibacter	0	4.999e-05	4.999e-05	4.999e-05	4.999e-05	0.00159968	0	0.00064987	0	k__Bacteria;p__Firmicutes;c__Clostridia;o__Lachnospirales;f__Lachnospiraceae;g__Fusicatenibacter;
Dubosiella	0.000424915	0.00109978	0	0.00144971	0.00069986	4.999e-05	0	0.00019996	0.00014997	k__Bacteria;p__Firmicutes;c__Bacilli;o__Erysipelotrichales;f__Erysipelotrichaceae;g__Dubosiella;
unidentified_Lachnospiraceae	0.000674865	0.00114977	0.000574885	0.000774845	0.00059988	0.00034993	0.00142472	0.000374925	0.000124975	k__Bacteria;p__unidentified_Bacteria;c__Clostridia;o__Lachnospirales;f__Lachnospiraceae;g__unidentified_Lachnospiraceae;
[Eubacterium]_xylanophilum_group	0.00142472	0.000324935	0.00084983	0.000924815	0.00064987	0.00044991	0.000274945	0.00069986	0.000374925	k__Bacteria;p__Firmicutes;c__Clostridia;o__Lachnospirales;f__Lachnospiraceae;g__[Eubacterium]_xylanophilum_group;
[Eubacterium]_hallii_group	0	0.00014997	0	4.999e-05	0	0.00127475	0	4.999e-05	0	k__Bacteria;p__Firmicutes;c__Clostridia;o__Lachnospirales;f__Lachnospiraceae;g__[Eubacterium]_hallii_group;
Alistipes	0.00014997	0.000124975	4.999e-05	7.4985e-05	9.998e-05	0.00127475	0	0.000274945	4.999e-05	k__Bacteria;p__Bacteroidota;c__Bacteroidia;o__Bacteroidales;f__Rikenellaceae;g__Alistipes;
Lachnoclostridium	0.00064987	0.00104979	0.00094981	0.00117477	0.000624875	0.00074985	0.00059988	0.00119976	0.00069986	k__Bacteria;p__Firmicutes;c__Clostridia;o__Lachnospirales;f__Lachnospiraceae;g__Lachnoclostridium;
[Eubacterium]_siraeum_group	0.00019996	9.998e-05	0.000674865	0.00019996	0.00019996	0.00117477	0.000274945	0.000524895	0	k__Bacteria;p__Firmicutes;c__Clostridia;o__Oscillospirales;f__Ruminococcaceae;g__[Eubacterium]_siraeum_group;
Candidatus_Methanomethylophilus	4.999e-05	0	4.999e-05	0.00114977	0	0.000424915	0	0.000124975	0.00112478	k__Archaea;p__Thermoplasmatota;c__Thermoplasmata;o__Methanomassiliicoccales;f__Methanomethylophilaceae;g__Candidatus_Methanomethylophilus;
Pyramidobacter	0.000224955	0.00039992	0.00107479	0.00019996	4.999e-05	9.998e-05	0.00034993	0.000274945	0.000424915	k__Bacteria;p__Synergistota;c__Synergistia;o__Synergistales;f__Synergistaceae;g__Pyramidobacter;
Helicobacter	0.000974805	4.999e-05	0.00034993	9.998e-05	0.00024995	0	0	0.000424915	4.999e-05	k__Bacteria;p__Campilobacterota;c__Campylobacteria;o__Campylobacterales;f__Helicobacteraceae;g__Helicobacter;
Anaerostipes	4.999e-05	0.000624875	0.0004999	0.000174965	4.999e-05	9.998e-05	4.999e-05	0.000974805	9.998e-05	k__Bacteria;p__Firmicutes;c__Clostridia;o__Lachnospirales;f__Lachnospiraceae;g__Anaerostipes;
Paraprevotella	0	2.4995e-05	0	0	0	0.000974805	0	0	0	k__Bacteria;p__Bacteroidota;c__Bacteroidia;o__Bacteroidales;f__Prevotellaceae;g__Paraprevotella;
Allobaculum	0.00034993	0.000224955	0.000674865	0.000224955	0.00094981	4.999e-05	0.000324935	0.00054989	0.000274945	k__Bacteria;p__Firmicutes;c__Bacilli;o__Erysipelotrichales;f__Erysipelotrichaceae;g__Allobaculum;
Prevotellaceae_Ga6A1_group	0.000474905	0.000924815	0	0.000174965	0	0.000324935	0.000624875	0.000124975	0	k__Bacteria;p__Bacteroidota;c__Bacteroidia;o__Bacteroidales;f__Prevotellaceae;g__Prevotellaceae_Ga6A1_group;
Faecalibaculum	0.00019996	0.000424915	0.000374925	0.000874825	0.00024995	0.00019996	0.00019996	0.000574885	9.998e-05	k__Bacteria;p__Firmicutes;c__Bacilli;o__Erysipelotrichales;f__Erysipelotrichaceae;g__Faecalibaculum;
Oribacterium	0.00019996	0.00034993	0.00054989	0.000824835	0.00019996	7.4985e-05	0.00014997	9.998e-05	0.00029994	k__Bacteria;p__Firmicutes;c__Clostridia;o__Lachnospirales;f__Lachnospiraceae;g__Oribacterium;
Olsenella	4.999e-05	0.00079984	0.00024995	4.999e-05	0.000124975	0	0	0.000324935	0.00014997	k__Bacteria;p__Actinobacteriota;c__Coriobacteriia;o__Coriobacteriales;f__Atopobiaceae;g__Olsenella;
Veillonellaceae_UCG-001	0.000174965	0	0.000174965	9.998e-05	0.00079984	4.999e-05	0.00069986	9.998e-05	9.998e-05	k__Bacteria;p__Firmicutes;c__Negativicutes;o__Veillonellales-Selenomonadales;f__Selenomonadaceae;g__Veillonellaceae_UCG-001;
Anaerobiospirillum	0	0.00039992	0.000774845	0	0.000324935	0	0.00044991	9.998e-05	0.00024995	k__Bacteria;p__Proteobacteria;c__Gammaproteobacteria;o__Aeromonadales;f__Succinivibrionaceae;g__Anaerobiospirillum;
Negativibacillus	0.00069986	0.000524895	0.000474905	0.000474905	0.000274945	7.4985e-05	0.00014997	0.000774845	0.00024995	k__Bacteria;p__Firmicutes;c__Clostridia;o__Oscillospirales;f__Ruminococcaceae;g__Negativibacillus;
A2	0.00014997	0	2.4995e-05	0.000724855	0	0.000124975	2.4995e-05	0	0	k__Bacteria;p__Firmicutes;c__Clostridia;o__Lachnospirales;f__Lachnospiraceae;g__A2;
Tyzzerella	0.000474905	0.000724855	0.0004999	0.00014997	7.4985e-05	0.000124975	9.998e-05	0.00034993	2.4995e-05	k__Bacteria;p__Firmicutes;c__Clostridia;o__Lachnospirales;f__Lachnospiraceae;g__Tyzzerella;
Dialister	4.999e-05	4.999e-05	0	0	9.998e-05	0	4.999e-05	0.00024995	0.000674865	k__Bacteria;p__Firmicutes;c__Negativicutes;o__Veillonellales-Selenomonadales;f__Veillonellaceae;g__Dialister;
Jeotgalicoccus	0.00019996	0.00064987	0	9.998e-05	4.999e-05	0	0.000424915	7.4985e-05	0	k__Bacteria;p__Firmicutes;c__Bacilli;o__Staphylococcales;f__Staphylococcaceae;g__Jeotgalicoccus;
Methanobrevibacter	0	0.00024995	4.999e-05	7.4985e-05	0.000124975	0	0.00064987	2.4995e-05	0.00044991	k__Archaea;p__Euryarchaeota;c__Methanobacteria;o__Methanobacteriales;f__Methanobacteriaceae;g__Methanobrevibacter;
Candidatus_Soleaferrea	4.999e-05	0.00064987	0	0.00014997	7.4985e-05	0.00014997	0	0	2.4995e-05	k__Bacteria;p__Firmicutes;c__Clostridia;o__Oscillospirales;f__Ruminococcaceae;g__Candidatus_Soleaferrea;
Intestinimonas	0.000474905	0.00054989	0.00039992	0.000624875	0.00019996	0.000474905	0.000224955	0.000274945	4.999e-05	k__Bacteria;p__Firmicutes;c__Clostridia;o__Oscillospirales;f__Oscillospiraceae;g__Intestinimonas;
[Eubacterium]_ventriosum_group	4.999e-05	7.4985e-05	0.00014997	0	4.999e-05	0.00019996	9.998e-05	0.00059988	0	k__Bacteria;p__Firmicutes;c__Clostridia;o__Lachnospirales;f__Lachnospiraceae;g__[Eubacterium]_ventriosum_group;
Defluviitaleaceae_UCG-011	2.4995e-05	0.00014997	9.998e-05	0.000324935	0.000574885	0	0.00024995	0.00039992	2.4995e-05	k__Bacteria;p__Firmicutes;c__Clostridia;o__Lachnospirales;f__Defluviitaleaceae;g__Defluviitaleaceae_UCG-011;
Butyricicoccus	0	2.4995e-05	9.998e-05	4.999e-05	4.999e-05	0.000574885	0	0.00019996	7.4985e-05	k__Bacteria;p__Firmicutes;c__Clostridia;o__Oscillospirales;f__Butyricicoccaceae;g__Butyricicoccus;
Family_XIII_AD3011_group	0.000374925	0.000424915	0.000174965	0.000324935	4.999e-05	4.999e-05	0.000124975	0.00054989	0.00019996	k__Bacteria;p__Firmicutes;c__Clostridia;o__Peptostreptococcales-Tissierellales;f__Anaerovoracaceae;g__Family_XIII_AD3011_group;
Anaerovorax	0.00034993	0.000174965	0.00014997	0.00034993	0.000274945	0.00054989	0.00019996	0.00029994	0.000124975	k__Bacteria;p__Firmicutes;c__Clostridia;o__Peptostreptococcales-Tissierellales;f__Anaerovoracaceae;g__Anaerovorax;
Lachnospiraceae_NK4B4_group	0.000524895	0.00054989	0.00024995	0.00034993	0.000174965	0.00019996	0.000174965	0.000374925	4.999e-05	k__Bacteria;p__Firmicutes;c__Clostridia;o__Lachnospirales;f__Lachnospiraceae;g__Lachnospiraceae_NK4B4_group;
[Ruminococcus]_torques_group	0	4.999e-05	7.4985e-05	0	0.000124975	0.000524895	9.998e-05	0.00024995	0	k__Bacteria;p__Firmicutes;c__Clostridia;o__Lachnospirales;f__Lachnospiraceae;g__[Ruminococcus]_torques_group;
Tuzzerella	0.000524895	0.000224955	0.00014997	9.998e-05	7.4985e-05	0.00014997	4.999e-05	9.998e-05	0.00014997	k__Bacteria;p__Firmicutes;c__Clostridia;o__Lachnospirales;f__Lachnospiraceae;g__Tuzzerella;
Mailhella	9.998e-05	0.0004999	0.000174965	0.00014997	0	0	0	9.998e-05	0.00024995	k__Bacteria;p__Desulfobacterota;c__Desulfovibrionia;o__Desulfovibrionales;f__Desulfovibrionaceae;g__Mailhella;
[Eubacterium]_eligens_group	2.4995e-05	0	0	0	0	0.0004999	0	0.00019996	0	k__Bacteria;p__Firmicutes;c__Clostridia;o__Lachnospirales;f__Lachnospiraceae;g__[Eubacterium]_eligens_group;
Corynebacterium	9.998e-05	0.0004999	0	0	0	4.999e-05	0.000124975	9.998e-05	0	k__Bacteria;p__Actinobacteriota;c__Actinobacteria;o__Corynebacteriales;f__Corynebacteriaceae;g__Corynebacterium;
Mitsuokella	0.000174965	0.000174965	0.000124975	2.4995e-05	4.999e-05	9.998e-05	0.000324935	0.000424915	0.0004999	k__Bacteria;p__Firmicutes;c__Negativicutes;o__Veillonellales-Selenomonadales;f__Selenomonadaceae;g__Mitsuokella;
Escherichia-Shigella	0.0004999	0.000174965	7.4985e-05	0.00029994	0.00019996	0.00014997	0	0.00034993	0.00019996	k__Bacteria;p__Proteobacteria;c__Gammaproteobacteria;o__Enterobacterales;f__Enterobacteriaceae;g__Escherichia-Shigella;
Subdoligranulum	0	0	0	0	0	0.000474905	0	0.0004999	0	k__Bacteria;p__Firmicutes;c__Clostridia;o__Oscillospirales;f__Ruminococcaceae;g__Subdoligranulum;
Staphylococcus	9.998e-05	4.999e-05	4.999e-05	0.000474905	4.999e-05	9.998e-05	0.000274945	0	0	k__Bacteria;p__Firmicutes;c__Bacilli;o__Staphylococcales;f__Staphylococcaceae;g__Staphylococcus;
Quinella	0	0.00019996	0.000474905	0	9.998e-05	0	0	0.00019996	0.00019996	k__Bacteria;p__Firmicutes;c__Negativicutes;o__Veillonellales-Selenomonadales;f__Selenomonadaceae;g__Quinella;
Parabacteroides	9.998e-05	0	0.00044991	0.00024995	7.4985e-05	0.00044991	0.000224955	0.00024995	0	k__Bacteria;p__Bacteroidota;c__Bacteroidia;o__Bacteroidales;f__Tannerellaceae;g__Parabacteroides;
Bifidobacterium	2.4995e-05	0.00044991	0	2.4995e-05	0.000224955	2.4995e-05	0.00014997	0.00024995	4.999e-05	k__Bacteria;p__Actinobacteriota;c__Actinobacteria;o__Bifidobacteriales;f__Bifidobacteriaceae;g__Bifidobacterium;
Moryella	0.000174965	0.000374925	0.00034993	0.00044991	0.000174965	0.00014997	0.000274945	0.000224955	0.000374925	k__Bacteria;p__Firmicutes;c__Clostridia;o__Lachnospirales;f__Lachnospiraceae;g__Moryella;
Lachnospiraceae_UCG-008	0.00019996	9.998e-05	0.000124975	9.998e-05	4.999e-05	0.00019996	0.000424915	0.00014997	9.998e-05	k__Bacteria;p__Firmicutes;c__Clostridia;o__Lachnospirales;f__Lachnospiraceae;g__Lachnospiraceae_UCG-008;
Lachnospira	2.4995e-05	0.000424915	0.00014997	0.00024995	0	0.00019996	0	4.999e-05	4.999e-05	k__Bacteria;p__Firmicutes;c__Clostridia;o__Lachnospirales;f__Lachnospiraceae;g__Lachnospira;
Allisonella	4.999e-05	0.00014997	9.998e-05	9.998e-05	4.999e-05	0.000124975	0.000424915	4.999e-05	0.000174965	k__Bacteria;p__Firmicutes;c__Negativicutes;o__Veillonellales-Selenomonadales;f__Veillonellaceae;g__Allisonella;
[Ruminococcus]_gauvreauii_group	9.998e-05	9.998e-05	9.998e-05	4.999e-05	0.00024995	0.000174965	0.00014997	0.00039992	0.00014997	k__Bacteria;p__Firmicutes;c__Clostridia;o__Lachnospirales;f__Lachnospiraceae;g__[Ruminococcus]_gauvreauii_group;
Syntrophococcus	0.00024995	0.000224955	9.998e-05	0.00014997	0.000274945	0.000374925	9.998e-05	0.00024995	4.999e-05	k__Bacteria;p__Firmicutes;c__Clostridia;o__Lachnospirales;f__Lachnospiraceae;g__Syntrophococcus;
Lachnospiraceae_ND3007_group	2.4995e-05	4.999e-05	0.000124975	0.000124975	2.4995e-05	0.00019996	0.000374925	0.00034993	0.000174965	k__Bacteria;p__Firmicutes;c__Clostridia;o__Lachnospirales;f__Lachnospiraceae;g__Lachnospiraceae_ND3007_group;
Acetitomaculum	4.999e-05	0.00024995	4.999e-05	0.00034993	0.00019996	0	0.00019996	0.00029994	4.999e-05	k__Bacteria;p__Firmicutes;c__Clostridia;o__Lachnospirales;f__Lachnospiraceae;g__Acetitomaculum;
Mannheimia	0.00014997	0	0.00029994	7.4985e-05	9.998e-05	0.000124975	0	0.000124975	9.998e-05	k__Bacteria;p__Proteobacteria;c__Gammaproteobacteria;o__Pasteurellales;f__Pasteurellaceae;g__Mannheimia;
unidentified_Muribaculaceae	2.4995e-05	0.00029994	0.000124975	4.999e-05	4.999e-05	4.999e-05	4.999e-05	0.000174965	9.998e-05	k__Bacteria;p__Bacteroidota;c__Bacteroidia;o__Bacteroidales;f__Muribaculaceae;g__unidentified_Muribaculaceae;
Barnesiella	2.4995e-05	0	0	0	0	0.00029994	0	0	0	k__Bacteria;p__Bacteroidota;c__Bacteroidia;o__Bacteroidales;f__Barnesiellaceae;g__Barnesiella;
Erysipelatoclostridium	0	0	0.000124975	0	0.00014997	0	7.4985e-05	0.00029994	4.999e-05	k__Bacteria;p__Firmicutes;c__Bacilli;o__Erysipelotrichales;f__Erysipelatoclostridiaceae;g__Erysipelatoclostridium;
UCG-012	4.999e-05	0	0	0	0	0.000274945	0	0	0	k__Bacteria;p__Firmicutes;c__Clostridia;o__unidentified_Clostridia;f__Hungateiclostridiaceae;g__UCG-012;
Collinsella	4.999e-05	4.999e-05	0	0.000124975	0	0.000274945	4.999e-05	0.000224955	2.4995e-05	k__Bacteria;p__Actinobacteriota;c__Coriobacteriia;o__Coriobacteriales;f__Coriobacteriaceae;g__Collinsella;
GCA-900066575	0.00014997	0.00024995	9.998e-05	0.000174965	4.999e-05	4.999e-05	0.00019996	9.998e-05	0.000124975	k__Bacteria;p__Firmicutes;c__Clostridia;o__Lachnospirales;f__Lachnospiraceae;g__GCA-900066575;
UCG-008	0	0	0.000124975	0	0.00024995	0	0	4.999e-05	0	k__Bacteria;p__Firmicutes;c__Clostridia;o__Oscillospirales;f__Butyricicoccaceae;g__UCG-008;
Streptococcus	4.999e-05	0.00014997	0	4.999e-05	9.998e-05	9.998e-05	0.000224955	0	4.999e-05	k__Bacteria;p__Firmicutes;c__Bacilli;o__Lactobacillales;f__Streptococcaceae;g__Streptococcus;
Schwartzia	4.999e-05	4.999e-05	0.000224955	9.998e-05	0	9.998e-05	0	0	0	k__Bacteria;p__Firmicutes;c__Negativicutes;o__Veillonellales-Selenomonadales;f__Selenomonadaceae;g__Schwartzia;
Solobacterium	0	0.000174965	0	7.4985e-05	0	0.000224955	2.4995e-05	0.000124975	2.4995e-05	k__Bacteria;p__Firmicutes;c__Bacilli;o__Erysipelotrichales;f__Erysipelotrichaceae;g__Solobacterium;
Adlercreutzia	0.000224955	4.999e-05	4.999e-05	0.000124975	0.00014997	4.999e-05	4.999e-05	0.000124975	2.4995e-05	k__Bacteria;p__Actinobacteriota;c__Coriobacteriia;o__Coriobacteriales;f__Eggerthellaceae;g__Adlercreutzia;
Coriobacteriaceae_UCG-002	0	0.000224955	0	0.00014997	0	0	0	9.998e-05	0	k__Bacteria;p__Actinobacteriota;c__Coriobacteriia;o__Coriobacteriales;f__Atopobiaceae;g__Coriobacteriaceae_UCG-002;
Lachnospiraceae_UCG-004	0	0	0	0	0	4.999e-05	0	0.000224955	9.998e-05	k__Bacteria;p__Firmicutes;c__Clostridia;o__Lachnospirales;f__Lachnospiraceae;g__Lachnospiraceae_UCG-004;
Erysipelotrichaceae_UCG-009	0	0.00014997	0	0.00019996	0.00014997	0	2.4995e-05	0	0	k__Bacteria;p__Firmicutes;c__Bacilli;o__Erysipelotrichales;f__Erysipelotrichaceae;g__Erysipelotrichaceae_UCG-009;
Atopostipes	0	0	0	0	0	0	0.00019996	0	0	k__Bacteria;p__Firmicutes;c__Bacilli;o__Lactobacillales;f__Carnobacteriaceae;g__Atopostipes;
Catonella	0.00019996	4.999e-05	0	9.998e-05	0	0	4.999e-05	0	4.999e-05	k__Bacteria;p__Firmicutes;c__Clostridia;o__Lachnospirales;f__Lachnospiraceae;g__Catonella;
Lachnospiraceae_UCG-006	9.998e-05	0.00019996	0.000124975	0.00014997	4.999e-05	4.999e-05	4.999e-05	4.999e-05	4.999e-05	k__Bacteria;p__Firmicutes;c__Clostridia;o__Lachnospirales;f__Lachnospiraceae;g__Lachnospiraceae_UCG-006;
Erysipelotrichaceae_UCG-003	0.000174965	4.999e-05	4.999e-05	9.998e-05	4.999e-05	4.999e-05	0.000124975	0.000174965	7.4985e-05	k__Bacteria;p__Firmicutes;c__Bacilli;o__Erysipelotrichales;f__Erysipelatoclostridiaceae;g__Erysipelotrichaceae_UCG-003;
Facklamia	0	0.000174965	0	7.4985e-05	0	2.4995e-05	0.000124975	0	0	k__Bacteria;p__Firmicutes;c__Bacilli;o__Lactobacillales;f__Aerococcaceae;g__Facklamia;
Sellimonas	0.000174965	4.999e-05	0	0	4.999e-05	4.999e-05	0	2.4995e-05	0	k__Bacteria;p__Firmicutes;c__Clostridia;o__Lachnospirales;f__Lachnospiraceae;g__Sellimonas;
Coprobacter	0	0	0	0	0	0.000174965	0	0	0	k__Bacteria;p__Bacteroidota;c__Bacteroidia;o__Bacteroidales;f__Barnesiellaceae;g__Coprobacter;
Bilophila	0	0	0	0	0	0.000174965	0	0	0	k__Bacteria;p__Desulfobacterota;c__Desulfovibrionia;o__Desulfovibrionales;f__Desulfovibrionaceae;g__Bilophila;
Family_XIII_UCG-001	9.998e-05	4.999e-05	0.00014997	4.999e-05	0	0.00014997	0.000174965	0	4.999e-05	k__Bacteria;p__Firmicutes;c__Clostridia;o__Peptostreptococcales-Tissierellales;f__Anaerovoracaceae;g__Family_XIII_UCG-001;
Asteroleplasma	0	4.999e-05	0.000124975	0	4.999e-05	4.999e-05	4.999e-05	0	0.000174965	k__Bacteria;p__Firmicutes;c__Bacilli;o__Erysipelotrichales;f__Erysipelatoclostridiaceae;g__Asteroleplasma;
[Eubacterium]_brachy_group	4.999e-05	9.998e-05	4.999e-05	4.999e-05	0.000124975	4.999e-05	7.4985e-05	0.000174965	9.998e-05	k__Bacteria;p__Firmicutes;c__Clostridia;o__Peptostreptococcales-Tissierellales;f__Anaerovoracaceae;g__[Eubacterium]_brachy_group;
Frisingicoccus	4.999e-05	0	0.000124975	0	4.999e-05	0	4.999e-05	0.00014997	0	k__Bacteria;p__Firmicutes;c__Clostridia;o__Lachnospirales;f__Lachnospiraceae;g__Frisingicoccus;
Lachnospiraceae_UCG-010	7.4985e-05	4.999e-05	0	4.999e-05	0	0	0.00014997	4.999e-05	0	k__Bacteria;p__Firmicutes;c__Clostridia;o__Lachnospirales;f__Lachnospiraceae;g__Lachnospiraceae_UCG-010;
V9D2013_group	0	0.00014997	0	4.999e-05	9.998e-05	0.00014997	4.999e-05	9.998e-05	0	k__Bacteria;p__Firmicutes;c__Clostridia;o__Oscillospirales;f__Oscillospiraceae;g__V9D2013_group;
Pseudomonas	0	0	0	0	0	0.00014997	7.4985e-05	0	0	k__Bacteria;p__Proteobacteria;c__Gammaproteobacteria;o__Pseudomonadales;f__Pseudomonadaceae;g__Pseudomonas;
Bibersteinia	0	0	0.00014997	0	4.999e-05	0.00014997	2.4995e-05	9.998e-05	4.999e-05	k__Bacteria;p__Proteobacteria;c__Gammaproteobacteria;o__Pasteurellales;f__Pasteurellaceae;g__Bibersteinia;
Marvinbryantia	0.00014997	9.998e-05	4.999e-05	0.00014997	4.999e-05	2.4995e-05	0.00014997	0	4.999e-05	k__Bacteria;p__Firmicutes;c__Clostridia;o__Lachnospirales;f__Lachnospiraceae;g__Marvinbryantia;
Desulfobulbus	9.998e-05	9.998e-05	0.00014997	9.998e-05	4.999e-05	2.4995e-05	4.999e-05	2.4995e-05	0	k__Bacteria;p__Desulfobacterota;c__Desulfobulbia;o__Desulfobulbales;f__Desulfobulbaceae;g__Desulfobulbus;
Lachnospiraceae_FCS020_group	0	0.000124975	0	4.999e-05	4.999e-05	0	0	0	0	k__Bacteria;p__Firmicutes;c__Clostridia;o__Lachnospirales;f__Lachnospiraceae;g__Lachnospiraceae_FCS020_group;
Rothia	9.998e-05	9.998e-05	4.999e-05	0	4.999e-05	0	0	0.000124975	4.999e-05	k__Bacteria;p__Actinobacteriota;c__Actinobacteria;o__Micrococcales;f__Micrococcaceae;g__Rothia;
Rodentibacter	0	0	0	0.000124975	0	0	0	2.4995e-05	0	k__Bacteria;p__Proteobacteria;c__Gammaproteobacteria;o__Pasteurellales;f__Pasteurellaceae;g__Rodentibacter;
Mogibacterium	0	9.998e-05	0	4.999e-05	0	0	4.999e-05	0	0	k__Bacteria;p__Firmicutes;c__Clostridia;o__Peptostreptococcales-Tissierellales;f__Anaerovoracaceae;g__Mogibacterium;
Shuttleworthia	2.4995e-05	0	0	9.998e-05	4.999e-05	0	4.999e-05	0	0	k__Bacteria;p__Firmicutes;c__Clostridia;o__Lachnospirales;f__Lachnospiraceae;g__Shuttleworthia;
Mycoplasma	9.998e-05	0	2.4995e-05	0	0	0	9.998e-05	0	0	k__Bacteria;p__Firmicutes;c__Bacilli;o__Mycoplasmatales;f__Mycoplasmataceae;g__Mycoplasma;
Enterorhabdus	9.998e-05	9.998e-05	4.999e-05	4.999e-05	9.998e-05	4.999e-05	0	4.999e-05	0	k__Bacteria;p__Actinobacteriota;c__Coriobacteriia;o__Coriobacteriales;f__Eggerthellaceae;g__Enterorhabdus;
Oxalobacter	0	0	0	0	0	9.998e-05	0	0	0	k__Bacteria;p__Proteobacteria;c__Gammaproteobacteria;o__Burkholderiales;f__Oxalobacteraceae;g__Oxalobacter;
Anaerofustis	9.998e-05	9.998e-05	0	0	4.999e-05	0	9.998e-05	0	2.4995e-05	k__Bacteria;p__Firmicutes;c__Clostridia;o__Eubacteriales;f__Anaerofustaceae;g__Anaerofustis;
SP3-e08	9.998e-05	0	0	2.4995e-05	9.998e-05	0	0	4.999e-05	0	k__Bacteria;p__Bacteroidota;c__Bacteroidia;o__Bacteroidales;f__Rikenellaceae;g__SP3-e08;
Ensifer	9.998e-05	9.998e-05	0	0	4.999e-05	0	4.999e-05	4.999e-05	4.999e-05	k__Bacteria;p__Proteobacteria;c__Alphaproteobacteria;o__Rhizobiales;f__Rhizobiaceae;g__Ensifer;
Veillonella	9.998e-05	0	0	0	7.4985e-05	0	0	2.4995e-05	0	k__Bacteria;p__Firmicutes;c__Negativicutes;o__Veillonellales-Selenomonadales;f__Veillonellaceae;g__Veillonella;
Candidatus_Stoquefichus	4.999e-05	0	0	0	4.999e-05	0	0	9.998e-05	0	k__Bacteria;p__Firmicutes;c__Bacilli;o__Erysipelotrichales;f__Erysipelatoclostridiaceae;g__Candidatus_Stoquefichus;
[Anaerorhabdus]_furcosa_group	0	4.999e-05	0	4.999e-05	4.999e-05	0	0	9.998e-05	0	k__Bacteria;p__Firmicutes;c__Bacilli;o__Erysipelotrichales;f__Erysipelotrichaceae;g__[Anaerorhabdus]_furcosa_group;
Parasutterella	4.999e-05	0	0	4.999e-05	0	9.998e-05	0	9.998e-05	0	k__Bacteria;p__Proteobacteria;c__Gammaproteobacteria;o__Burkholderiales;f__Sutterellaceae;g__Parasutterella;
Vagococcus	0	9.998e-05	0	0	0	0	0	2.4995e-05	0	k__Bacteria;p__Firmicutes;c__Bacilli;o__Lactobacillales;f__Vagococcaceae;g__Vagococcus;
Harryflintia	0	0	0	0	4.999e-05	2.4995e-05	0	9.998e-05	0	k__Bacteria;p__Firmicutes;c__Clostridia;o__Oscillospirales;f__Ruminococcaceae;g__Harryflintia;
Peptococcus	9.998e-05	4.999e-05	0	4.999e-05	0	0	0	4.999e-05	0	k__Bacteria;p__Firmicutes;c__Clostridia;o__Peptococcales;f__Peptococcaceae;g__Peptococcus;
Pygmaiobacter	7.4985e-05	0	9.998e-05	2.4995e-05	0	0	2.4995e-05	0	2.4995e-05	k__Bacteria;p__Firmicutes;c__Clostridia;o__Oscillospirales;f__Ruminococcaceae;g__Pygmaiobacter;
DNF00809	0	0	7.4985e-05	0	0	0	0	0	0	k__Bacteria;p__Actinobacteriota;c__Coriobacteriia;o__Coriobacteriales;f__Eggerthellaceae;g__DNF00809;
Odoribacter	4.999e-05	0	7.4985e-05	0	0	0	4.999e-05	0	0	k__Bacteria;p__Bacteroidota;c__Bacteroidia;o__Bacteroidales;f__Marinifilaceae;g__Odoribacter;
Moraxella	0	0	0	0	0	4.999e-05	0	0	7.4985e-05	k__Bacteria;p__Proteobacteria;c__Gammaproteobacteria;o__Pseudomonadales;f__Moraxellaceae;g__Moraxella;
Holdemania	4.999e-05	0	7.4985e-05	0	0	0	0	0	0	k__Bacteria;p__Firmicutes;c__Bacilli;o__Erysipelotrichales;f__Erysipelotrichaceae;g__Holdemania;
Cetobacterium	0	0	0	0	0	0	0	4.999e-05	0	k__Bacteria;p__Fusobacteriota;c__Fusobacteriia;o__Fusobacteriales;f__Fusobacteriaceae;g__Cetobacterium;
Coprococcus	0	0	0	0	0	0	0	4.999e-05	0	k__Bacteria;p__Firmicutes;c__Clostridia;o__Lachnospirales;f__Lachnospiraceae;g__Coprococcus;
Gordonibacter	0	0	0	4.999e-05	0	0	0	0	0	k__Bacteria;p__Actinobacteriota;c__Coriobacteriia;o__Coriobacteriales;f__Eggerthellaceae;g__Gordonibacter;
Hydrogenoanaerobacterium	0	4.999e-05	4.999e-05	0	0	0	2.4995e-05	4.999e-05	0	k__Bacteria;p__Firmicutes;c__Clostridia;o__Oscillospirales;f__unidentified_Oscillospirales;g__Hydrogenoanaerobacterium;
Conchiformibius	0	4.999e-05	0	0	0	0	0	4.999e-05	0	k__Bacteria;p__Proteobacteria;c__Gammaproteobacteria;o__Burkholderiales;f__Neisseriaceae;g__Conchiformibius;
Sporosarcina	0	4.999e-05	0	0	0	0	0	0	0	k__Bacteria;p__Firmicutes;c__Bacilli;o__Bacillales;f__Planococcaceae;g__Sporosarcina;
Cronobacter	0	4.999e-05	2.4995e-05	2.4995e-05	2.4995e-05	0	4.999e-05	0	0	k__Bacteria;p__Proteobacteria;c__Gammaproteobacteria;o__Enterobacterales;f__Enterobacteriaceae;g__Cronobacter;
Paludicola	0	4.999e-05	0	0	4.999e-05	0	0	0	0	k__Bacteria;p__Firmicutes;c__Clostridia;o__Oscillospirales;f__Ruminococcaceae;g__Paludicola;
Methanosphaera	0	0	4.999e-05	0	0	0	0	4.999e-05	2.4995e-05	k__Archaea;p__Euryarchaeota;c__Methanobacteria;o__Methanobacteriales;f__Methanobacteriaceae;g__Methanosphaera;
Succinivibrionaceae_UCG-002	0	0	0	0	0	0	4.999e-05	0	0	k__Bacteria;p__Proteobacteria;c__Gammaproteobacteria;o__Aeromonadales;f__Succinivibrionaceae;g__Succinivibrionaceae_UCG-002;
unidentified_Christensenellaceae	4.999e-05	0	0	0	0	0	0	2.4995e-05	0	k__Bacteria;p__Firmicutes;c__Clostridia;o__Christensenellales;f__Christensenellaceae;g__unidentified_Christensenellaceae;
Succinatimonas	0	0	0	0	0	4.999e-05	0	0	4.999e-05	k__Bacteria;p__Proteobacteria;c__Gammaproteobacteria;o__Aeromonadales;f__Succinivibrionaceae;g__Succinatimonas;
unidentified_Bacteria	0	0	4.999e-05	0	0	0	0	0	0	k__Bacteria;p__unidentified_Bacteria;c__unidentified_Bacteria;o__unidentified_Bacteria;f__unidentified_Bacteria;g__unidentified_Bacteria;
unidentified_Clostridia_vadinBB60_group	0	4.999e-05	0	0	0	2.4995e-05	4.999e-05	0	4.999e-05	k__Bacteria;p__Firmicutes;c__Clostridia;o__Clostridia_vadinBB60_group;f__unidentified_Clostridia_vadinBB60_group;g__unidentified_Clostridia_vadinBB60_group;
Lautropia	0	4.999e-05	0	0	0	0	0	0	0	k__Bacteria;p__Proteobacteria;c__Gammaproteobacteria;o__Burkholderiales;f__Burkholderiaceae;g__Lautropia;
Atopobium	4.999e-05	4.999e-05	4.999e-05	4.999e-05	0	0	0	4.999e-05	0	k__Bacteria;p__Actinobacteriota;c__Coriobacteriia;o__Coriobacteriales;f__Atopobiaceae;g__Atopobium;
Leucobacter	0	4.999e-05	0	0	0	4.999e-05	0	0	0	k__Bacteria;p__Actinobacteriota;c__Actinobacteria;o__Micrococcales;f__Microbacteriaceae;g__Leucobacter;
Lysinibacillus	0	0	0	0	4.999e-05	0	0	0	2.4995e-05	k__Bacteria;p__Firmicutes;c__Bacilli;o__Bacillales;f__Planococcaceae;g__Lysinibacillus;
Anaerotruncus	0	2.4995e-05	2.4995e-05	2.4995e-05	0	2.4995e-05	0	2.4995e-05	2.4995e-05	k__Bacteria;p__Firmicutes;c__Clostridia;o__Oscillospirales;f__Ruminococcaceae;g__Anaerotruncus;
Butyricimonas	2.4995e-05	0	0	0	0	0	0	0	2.4995e-05	k__Bacteria;p__Bacteroidota;c__Bacteroidia;o__Bacteroidales;f__Marinifilaceae;g__Butyricimonas;
DTU089	0	0	0	0	0	0	0	0	0	k__Bacteria;p__Firmicutes;c__Clostridia;o__Oscillospirales;f__Ruminococcaceae;g__DTU089;
Phocea	0	0	0	0	0	0	0	0	0	k__Bacteria;p__Firmicutes;c__Clostridia;o__Oscillospirales;f__Ruminococcaceae;g__Phocea;
ASF356	0	0	0	0	0	0	0	0	0	k__Bacteria;p__Firmicutes;c__Clostridia;o__Lachnospirales;f__Lachnospiraceae;g__ASF356;
Others	0.112827	0.203109	0.118376	0.169016	0.206634	0.154569	0.265122	0.179039	0.157743	Others

## Sheet: Supplemental Table S7
Supplemental Table S7 Functional prediction analasis in KEGG level 3
# Constructed from biom file
#OTU ID	Control1	Control2	Control3	SIF1-1	SIF1-2	SIF1-3	SIF2-1	SIF2-2	SIF2-3	KEGG_Pathways
1,1,1-Trichloro-2,2-bis(4-chlorophenyl)ethane (DDT) degradation	26	22	16	10	20	11	33	40	10	Metabolism; Xenobiotics Biodegradation and Metabolism; 1,1,1-Trichloro-2,2-bis(4-chlorophenyl)ethane (DDT) degradation
ABC transporters	513996	661364	647181	688037	526688	662171	595079	560940	414448	Environmental Information Processing; Membrane Transport; ABC transporters
Adherens junction	0	0	0	0	0	0	0	0	0	Cellular Processes; Cell Communication; Adherens junction
Adipocytokine signaling pathway	17814	21921	16338	21550	16258	15299	16616	14309	20009	Organismal Systems; Endocrine System; Adipocytokine signaling pathway
African trypanosomiasis	146	206	58	75	58	90	58	67	44	Human Diseases; Infectious Diseases; African trypanosomiasis
Alanine, aspartate and glutamate metabolism	231554	274052	238640	286883	225492	236427	265349	214668	237156	Metabolism; Amino Acid Metabolism; Alanine, aspartate and glutamate metabolism
Aldosterone-regulated sodium reabsorption	0	0	0	0	0	0	0	0	0	Organismal Systems; Excretory System; Aldosterone-regulated sodium reabsorption
Alzheimer's disease	10744	13042	10792	13299	10585	11337	12045	10061	10640	Human Diseases; Neurodegenerative Diseases; Alzheimer's disease
Amino acid metabolism	43345	47694	40699	50179	37995	37312	47118	34552	44268	Unclassified; Metabolism; Amino acid metabolism
Amino acid related enzymes	313276	374862	329543	386316	311635	331732	359406	304040	313884	Metabolism; Amino Acid Metabolism; Amino acid related enzymes
Amino sugar and nucleotide sugar metabolism	280704	340323	295062	356384	278200	294044	323011	270817	275049	Metabolism; Carbohydrate Metabolism; Amino sugar and nucleotide sugar metabolism
Aminoacyl-tRNA biosynthesis	245841	306973	264466	310229	244714	266233	279514	240527	242054	Genetic Information Processing; Translation; Aminoacyl-tRNA biosynthesis
Aminobenzoate degradation	21932	26302	22490	31061	20109	20496	23353	17709	21586	Metabolism; Xenobiotics Biodegradation and Metabolism; Aminobenzoate degradation
Amoebiasis	1447	3166	1626	3657	1277	1467	1217	1183	701	Human Diseases; Infectious Diseases; Amoebiasis
Amyotrophic lateral sclerosis (ALS)	2504	2828	1118	3417	4084	1936	4726	3038	3815	Human Diseases; Neurodegenerative Diseases; Amyotrophic lateral sclerosis (ALS)
Antigen processing and presentation	9802	11675	10165	12192	9858	10425	11219	9521	10076	Organismal Systems; Immune System; Antigen processing and presentation
Apoptosis	78	92	55	168	128	134	75	31	92	Cellular Processes; Cell Growth and Death; Apoptosis
Arachidonic acid metabolism	7507	8876	7885	8652	3403	5285	3721	2666	7631	Metabolism; Lipid Metabolism; Arachidonic acid metabolism
Arginine and proline metabolism	251551	311120	270605	324836	240768	254797	284387	231174	246507	Metabolism; Amino Acid Metabolism; Arginine and proline metabolism
Arrhythmogenic right ventricular cardiomyopathy (ARVC)	0	0	0	0	0	0	0	0	0	Human Diseases; Cardiovascular Diseases; Arrhythmogenic right ventricular cardiomyopathy (ARVC)
Ascorbate and aldarate metabolism	19051	21467	16228	23851	21270	21397	23883	21875	19210	Metabolism; Carbohydrate Metabolism; Ascorbate and aldarate metabolism
Atrazine degradation	2117	2874	2968	3722	1275	1686	1446	1752	639	Metabolism; Xenobiotics Biodegradation and Metabolism; Atrazine degradation
Bacterial chemotaxis	78377	120004	126613	115444	65815	95052	77095	71363	55831	Cellular Processes; Cell Motility; Bacterial chemotaxis
Bacterial invasion of epithelial cells	1305	245	1123	227	2057	1704	1259	2496	1348	Human Diseases; Infectious Diseases; Bacterial invasion of epithelial cells
Bacterial motility proteins	164263	263798	252515	248925	132595	182741	150132	146852	117642	Cellular Processes; Cell Motility; Bacterial motility proteins
Bacterial secretion system	137445	146749	139189	147692	147570	149076	150293	151439	142442	Environmental Information Processing; Membrane Transport; Bacterial secretion system
Bacterial toxins	18214	26572	20412	26942	17440	18898	21928	16794	15381	Environmental Information Processing; Signaling Molecules and Interaction; Bacterial toxins
Basal transcription factors	81	193	87	192	251	588	187	84	147	Genetic Information Processing; Transcription; Basal transcription factors
Base excision repair	88811	105960	94412	109490	89393	94316	98501	87676	87579	Genetic Information Processing; Replication and Repair; Base excision repair
Benzoate degradation	38131	52886	46859	53403	33938	41399	41453	33736	31098	Metabolism; Xenobiotics Biodegradation and Metabolism; Benzoate degradation
Betalain biosynthesis	4	4	2	1	0	1	1	0	2	Metabolism; Biosynthesis of Other Secondary Metabolites; Betalain biosynthesis
Bile secretion	11	44	19	145	106	235	111	36	52	Organismal Systems; Digestive System; Bile secretion
Biosynthesis and biodegradation of secondary metabolites	12546	13577	12504	14625	11026	10021	10206	10181	12042	Unclassified; Metabolism; Biosynthesis and biodegradation of secondary metabolites
Biosynthesis of 12-, 14- and 16-membered macrolides	0	0	0	0	0	0	0	0	0	Metabolism; Metabolism of Terpenoids and Polyketides; Biosynthesis of 12-, 14- and 16-membered macrolides
Biosynthesis of ansamycins	19849	27087	24060	29054	19513	24439	22831	20725	16515	Metabolism; Metabolism of Terpenoids and Polyketides; Biosynthesis of ansamycins
Biosynthesis of siderophore group nonribosomal peptides	4022	4783	3277	6717	2235	2942	1708	1505	3146	Metabolism; Metabolism of Terpenoids and Polyketides; Biosynthesis of siderophore group nonribosomal peptides
Biosynthesis of type II polyketide backbone	0	0	0	0	0	0	0	0	0	Metabolism; Metabolism of Terpenoids and Polyketides; Biosynthesis of type II polyketide backbone
Biosynthesis of type II polyketide products	0	0	0	0	0	0	0	0	0	Metabolism; Metabolism of Terpenoids and Polyketides; Biosynthesis of type II polyketide products
Biosynthesis of unsaturated fatty acids	24038	27675	26906	28797	23194	27180	22621	24687	22593	Metabolism; Lipid Metabolism; Biosynthesis of unsaturated fatty acids
Biosynthesis of vancomycin group antibiotics	12364	14629	12022	14890	13823	12183	16104	12696	14448	Metabolism; Metabolism of Terpenoids and Polyketides; Biosynthesis of vancomycin group antibiotics
Biotin metabolism	32946	35168	29539	35069	38679	34342	43625	37384	38812	Metabolism; Metabolism of Cofactors and Vitamins; Biotin metabolism
Bisphenol degradation	14695	17011	17094	19452	15077	16964	16699	15160	13913	Metabolism; Xenobiotics Biodegradation and Metabolism; Bisphenol degradation
Bladder cancer	10	12	4	11	7	16	6	25	76	Human Diseases; Cancers; Bladder cancer
Butanoate metabolism	128384	154449	142022	156973	123187	136136	142239	124751	118916	Metabolism; Carbohydrate Metabolism; Butanoate metabolism
Butirosin and neomycin biosynthesis	15567	20827	17160	21727	14380	14902	17254	13488	16027	Metabolism; Biosynthesis of Other Secondary Metabolites; Butirosin and neomycin biosynthesis
C5-Branched dibasic acid metabolism	60732	75222	66893	76693	64785	69535	72768	64100	61549	Metabolism; Carbohydrate Metabolism; C5-Branched dibasic acid metabolism
CAM ligands	0	0	0	0	0	0	0	0	0	Environmental Information Processing; Signaling Molecules and Interaction; CAM ligands
Caffeine metabolism	3	1	0	0	2	0	0	1	1	Metabolism; Biosynthesis of Other Secondary Metabolites; Caffeine metabolism
Calcium signaling pathway	0	0	0	0	0	0	0	0	0	Environmental Information Processing; Signal Transduction; Calcium signaling pathway
Caprolactam degradation	4050	2439	3321	3944	5389	5092	2927	5926	5156	Metabolism; Xenobiotics Biodegradation and Metabolism; Caprolactam degradation
Carbohydrate digestion and absorption	3588	5231	4338	4633	2103	3556	1886	2417	3277	Organismal Systems; Digestive System; Carbohydrate digestion and absorption
Carbohydrate metabolism	33058	44310	38147	49249	26085	31944	26144	24774	27382	Unclassified; Metabolism; Carbohydrate metabolism
Carbon fixation in photosynthetic organisms	130655	155697	137461	162871	128045	139841	150799	126941	130864	Metabolism; Energy Metabolism; Carbon fixation in photosynthetic organisms
Carbon fixation pathways in prokaryotes	227239	265950	222695	266628	226873	224750	256404	217382	236183	Metabolism; Energy Metabolism; Carbon fixation pathways in prokaryotes
Cardiac muscle contraction	263	289	114	465	280	375	177	165	285	Organismal Systems; Circulatory System; Cardiac muscle contraction
Carotenoid biosynthesis	422	1076	685	633	381	702	332	765	756	Metabolism; Metabolism of Terpenoids and Polyketides; Carotenoid biosynthesis
Cell cycle	0	4	2	8	4	14	13	8	18	Cellular Processes; Cell Growth and Death; Cell cycle
Cell cycle - Caulobacter	112199	132219	113749	138230	109961	118950	130680	105574	116807	Cellular Processes; Cell Growth and Death; Cell cycle - Caulobacter
Cell cycle - yeast	0	0	0	0	0	0	0	0	0	Cellular Processes; Cell Growth and Death; Cell cycle - yeast
Cell division	17470	17542	14852	16567	21448	17206	23050	20714	20246	Unclassified; Cellular Processes and Signaling; Cell division
Cell motility and secretion	40904	39029	37876	41415	44350	41854	43427	43139	45419	Unclassified; Cellular Processes and Signaling; Cell motility and secretion
Cellular antigens	12730	12835	8149	13888	10030	7871	12319	7445	15894	Environmental Information Processing; Signaling Molecules and Interaction; Cellular antigens
Chagas disease (American trypanosomiasis)	8	12	2	3	6	5	5	6	4	Human Diseases; Infectious Diseases; Chagas disease (American trypanosomiasis)
Chaperones and folding catalysts	227757	255184	224938	265105	232953	232479	257445	225687	240446	Genetic Information Processing; Folding, Sorting and Degradation; Chaperones and folding catalysts
Chloroalkane and chloroalkene degradation	32016	44898	37641	45581	31782	37472	38625	34064	25472	Metabolism; Xenobiotics Biodegradation and Metabolism; Chloroalkane and chloroalkene degradation
Chlorocyclohexane and chlorobenzene degradation	552	762	516	1315	461	560	420	460	1003	Metabolism; Xenobiotics Biodegradation and Metabolism; Chlorocyclohexane and chlorobenzene degradation
Cholinergic synapse	0	0	0	0	0	0	0	0	0	Organismal Systems; Nervous System; Cholinergic synapse
Chromosome	345824	402427	368519	412373	350065	372638	388775	353280	342223	Genetic Information Processing; Replication and Repair; Chromosome
Chronic myeloid leukemia	0	0	0	0	0	0	0	0	0	Human Diseases; Cancers; Chronic myeloid leukemia
Circadian rhythm - plant	1	3	0	0	1	1	0	1	1	Organismal Systems; Environmental Adaptation; Circadian rhythm - plant
Citrate cycle (TCA cycle)	145727	163785	128672	158589	152983	138191	161454	148023	161180	Metabolism; Carbohydrate Metabolism; Citrate cycle (TCA cycle)
Clavulanic acid biosynthesis	0	0	0	0	0	0	0	0	0	Metabolism; Biosynthesis of Other Secondary Metabolites; Clavulanic acid biosynthesis
Colorectal cancer	60	64	15	143	72	108	26	11	80	Human Diseases; Cancers; Colorectal cancer
Complement and coagulation cascades	0	0	0	0	0	0	0	0	0	Organismal Systems; Immune System; Complement and coagulation cascades
Cyanoamino acid metabolism	65357	80313	65644	85337	56783	60767	71813	51113	67685	Metabolism; Metabolism of Other Amino Acids; Cyanoamino acid metabolism
Cysteine and methionine metabolism	196269	241023	214745	244225	184536	204202	217891	183192	185661	Metabolism; Amino Acid Metabolism; Cysteine and methionine metabolism
Cytochrome P450	0	0	0	0	0	0	0	0	0	Metabolism; Enzyme Families; Cytochrome P450
Cytokine receptors	0	0	0	0	0	0	0	0	0	Environmental Information Processing; Signaling Molecules and Interaction; Cytokine receptors
Cytokine-cytokine receptor interaction	0	0	0	0	0	0	0	0	0	Environmental Information Processing; Signaling Molecules and Interaction; Cytokine-cytokine receptor interaction
Cytoskeleton proteins	68714	94055	85725	94077	65914	79796	80479	67723	60093	Cellular Processes; Cell Motility; Cytoskeleton proteins
Cytosolic DNA-sensing pathway	0	0	0	0	0	0	0	0	0	Organismal Systems; Immune System; Cytosolic DNA-sensing pathway
D-Alanine metabolism	22083	26593	23338	27525	21229	22831	24494	20704	20935	Metabolism; Metabolism of Other Amino Acids; D-Alanine metabolism
D-Arginine and D-ornithine metabolism	175	280	136	870	185	159	95	159	80	Metabolism; Metabolism of Other Amino Acids; D-Arginine and D-ornithine metabolism
D-Glutamine and D-glutamate metabolism	32475	38833	33302	37237	33207	32978	39288	31730	34055	Metabolism; Metabolism of Other Amino Acids; D-Glutamine and D-glutamate metabolism
DNA repair and recombination proteins	620092	735972	657308	757350	617714	659169	697871	606652	615529	Genetic Information Processing; Replication and Repair; DNA repair and recombination proteins
DNA replication	150272	178314	156097	182053	152722	156446	171100	147277	150887	Genetic Information Processing; Replication and Repair; DNA replication
DNA replication proteins	279597	328776	295516	338983	279649	289433	313367	272196	277733	Genetic Information Processing; Replication and Repair; DNA replication proteins
Dilated cardiomyopathy (DCM)	0	0	0	0	0	0	0	0	0	Human Diseases; Cardiovascular Diseases; Dilated cardiomyopathy (DCM)
Dioxin degradation	8239	13348	10869	11383	8179	10420	9214	9734	4594	Metabolism; Xenobiotics Biodegradation and Metabolism; Dioxin degradation
Drug metabolism - cytochrome P450	3664	4026	3471	4660	4054	4432	2657	5079	4115	Metabolism; Xenobiotics Biodegradation and Metabolism; Drug metabolism - cytochrome P450
Drug metabolism - other enzymes	70016	85494	74254	92662	62968	68038	77120	57291	68352	Metabolism; Xenobiotics Biodegradation and Metabolism; Drug metabolism - other enzymes
ECM-receptor interaction	0	0	0	0	0	0	0	0	0	Environmental Information Processing; Signaling Molecules and Interaction; ECM-receptor interaction
Electron transfer carriers	3492	4247	3308	3425	3716	4092	2919	4719	2879	Unclassified; Cellular Processes and Signaling; Electron transfer carriers
Endocrine and other factor-regulated calcium reabsorption	0	0	0	0	0	0	0	0	0	Organismal Systems; Excretory System; Endocrine and other factor-regulated calcium reabsorption
Endocytosis	0	0	0	0	0	1	0	0	0	Cellular Processes; Transport and Catabolism; Endocytosis
Energy metabolism	212002	249594	210730	257491	206238	206221	241453	195072	216798	Unclassified; Metabolism; Energy metabolism
Epithelial cell signaling in Helicobacter pylori infection	18623	23934	19553	24668	17796	19244	21670	16908	18247	Human Diseases; Infectious Diseases; Epithelial cell signaling in Helicobacter pylori infection
ErbB signaling pathway	0	0	0	0	0	0	0	0	0	Environmental Information Processing; Signal Transduction; ErbB signaling pathway
Ether lipid metabolism	89	69	51	44	82	81	35	62	26	Metabolism; Lipid Metabolism; Ether lipid metabolism
Ethylbenzene degradation	14259	16513	14864	17927	11724	11863	13078	10827	13575	Metabolism; Xenobiotics Biodegradation and Metabolism; Ethylbenzene degradation
Fat digestion and absorption	0	0	0	0	0	0	0	0	0	Organismal Systems; Digestive System; Fat digestion and absorption
Fatty acid biosynthesis	100248	119980	110998	124750	100142	112508	107658	101069	94171	Metabolism; Lipid Metabolism; Fatty acid biosynthesis
Fatty acid elongation in mitochondria	0	0	0	0	0	0	0	0	0	Metabolism; Lipid Metabolism; Fatty acid elongation in mitochondria
Fatty acid metabolism	44177	51398	46808	53340	43305	48004	47120	44273	44092	Metabolism; Lipid Metabolism; Fatty acid metabolism
Fc epsilon RI signaling pathway	0	0	0	0	0	0	0	0	0	Organismal Systems; Immune System; Fc epsilon RI signaling pathway
Fc gamma R-mediated phagocytosis	0	0	0	0	0	1	0	0	0	Organismal Systems; Immune System; Fc gamma R-mediated phagocytosis
Flagellar assembly	69938	115410	106588	112913	54364	73900	64210	57769	52700	Cellular Processes; Cell Motility; Flagellar assembly
Flavone and flavonol biosynthesis	446	712	732	1778	440	542	350	504	364	Metabolism; Biosynthesis of Other Secondary Metabolites; Flavone and flavonol biosynthesis
Flavonoid biosynthesis	1147	2294	1567	3243	1230	1201	650	1246	456	Metabolism; Biosynthesis of Other Secondary Metabolites; Flavonoid biosynthesis
Fluorobenzoate degradation	135	133	48	195	99	201	78	63	664	Metabolism; Xenobiotics Biodegradation and Metabolism; Fluorobenzoate degradation
Focal adhesion	0	0	0	0	0	0	0	0	0	Cellular Processes; Cell Communication; Focal adhesion
Folate biosynthesis	88647	94890	81155	102597	90644	87848	106293	85675	99489	Metabolism; Metabolism of Cofactors and Vitamins; Folate biosynthesis
Fructose and mannose metabolism	175987	215929	191666	234247	165939	192493	200812	165666	160388	Metabolism; Carbohydrate Metabolism; Fructose and mannose metabolism
Function unknown	248565	280190	256082	291285	261450	261951	272574	264865	238424	Unclassified; Poorly Characterized; Function unknown
G protein-coupled receptors	29	41	0	24	14	21	17	23	2	Environmental Information Processing; Signaling Molecules and Interaction; G protein-coupled receptors
GTP-binding proteins	0	0	0	0	0	0	0	0	0	Environmental Information Processing; Signaling Molecules and Interaction; GTP-binding proteins
Galactose metabolism	133944	170348	143022	180235	133750	136513	169025	127598	135025	Metabolism; Carbohydrate Metabolism; Galactose metabolism
Gastric acid secretion	0	0	0	0	0	0	0	0	0	Organismal Systems; Digestive System; Gastric acid secretion
General function prediction only	690104	855865	749064	878342	673242	739921	791206	655453	668109	Unclassified; Poorly Characterized; General function prediction only
Geraniol degradation	13386	10194	9687	11766	12693	11104	10648	12463	16674	Metabolism; Metabolism of Terpenoids and Polyketides; Geraniol degradation
Germination	6579	12260	9621	9731	4530	7684	6974	6880	2727	Unclassified; Cellular Processes and Signaling; Germination
Glioma	0	0	0	0	0	0	0	0	0	Human Diseases; Cancers; Glioma
Glutamatergic synapse	19965	25901	22058	27567	19066	20452	22338	17762	19322	Organismal Systems; Nervous System; Glutamatergic synapse
Glutathione metabolism	45084	41134	44621	43638	48856	48880	45589	50006	48438	Metabolism; Metabolism of Other Amino Acids; Glutathione metabolism
Glycan bindng proteins	0	0	0	0	0	0	0	0	0	Environmental Information Processing; Signaling Molecules and Interaction; Glycan bindng proteins
Glycan biosynthesis and metabolism	13379	9450	12268	8283	16149	13780	12620	17819	15118	Unclassified; Metabolism; Glycan biosynthesis and metabolism
Glycerolipid metabolism	66059	87686	77500	92292	69971	78575	84405	71923	60723	Metabolism; Lipid Metabolism; Glycerolipid metabolism
Glycerophospholipid metabolism	106249	126473	115777	128173	113589	123321	133719	116525	103547	Metabolism; Lipid Metabolism; Glycerophospholipid metabolism
Glycine, serine and threonine metabolism	184312	206475	187886	220388	179892	183907	207844	172137	187895	Metabolism; Amino Acid Metabolism; Glycine, serine and threonine metabolism
Glycolysis / Gluconeogenesis	213315	268920	230076	273127	208329	229027	241128	211173	200659	Metabolism; Carbohydrate Metabolism; Glycolysis / Gluconeogenesis
Glycosaminoglycan biosynthesis - chondroitin sulfate	2	0	3	1	1	3	0	2	1	Metabolism; Glycan Biosynthesis and Metabolism; Glycosaminoglycan biosynthesis - chondroitin sulfate
Glycosaminoglycan degradation	17068	17366	8886	17210	22310	10077	28150	16900	26509	Metabolism; Glycan Biosynthesis and Metabolism; Glycosaminoglycan degradation
Glycosphingolipid biosynthesis - ganglio series	14626	14522	7443	13907	18457	8371	23428	13704	22638	Metabolism; Glycan Biosynthesis and Metabolism; Glycosphingolipid biosynthesis - ganglio series
Glycosphingolipid biosynthesis - globo series	26882	31320	20880	33155	31744	20561	39191	25699	35363	Metabolism; Glycan Biosynthesis and Metabolism; Glycosphingolipid biosynthesis - globo series
Glycosphingolipid biosynthesis - lacto and neolacto series	0	0	0	0	0	10	0	2	0	Metabolism; Glycan Biosynthesis and Metabolism; Glycosphingolipid biosynthesis - lacto and neolacto series
Glycosylphosphatidylinositol(GPI)-anchor biosynthesis	0	0	0	0	0	0	0	0	0	Metabolism; Glycan Biosynthesis and Metabolism; Glycosylphosphatidylinositol(GPI)-anchor biosynthesis
Glycosyltransferases	74931	79774	73382	81238	73458	74991	75587	74381	77565	Metabolism; Glycan Biosynthesis and Metabolism; Glycosyltransferases
Glyoxylate and dicarboxylate metabolism	101670	117981	107817	129036	100728	112049	115758	98862	102817	Metabolism; Carbohydrate Metabolism; Glyoxylate and dicarboxylate metabolism
GnRH signaling pathway	0	0	0	0	0	1	0	0	0	Organismal Systems; Endocrine System; GnRH signaling pathway
Hedgehog signaling pathway	0	0	0	0	0	0	0	0	0	Environmental Information Processing; Signal Transduction; Hedgehog signaling pathway
Hematopoietic cell lineage	0	0	0	0	0	0	0	0	0	Organismal Systems; Immune System; Hematopoietic cell lineage
Hepatitis C	0	4	2	8	4	14	13	8	18	Human Diseases; Infectious Diseases; Hepatitis C
Histidine metabolism	129397	161697	132519	162855	128827	132761	155982	122079	130514	Metabolism; Amino Acid Metabolism; Histidine metabolism
Homologous recombination	215186	254494	224174	257642	219979	227006	244402	214626	216663	Genetic Information Processing; Replication and Repair; Homologous recombination
Huntington's disease	7641	6309	6445	7454	7546	5558	7519	6565	8882	Human Diseases; Neurodegenerative Diseases; Huntington's disease
Hypertrophic cardiomyopathy (HCM)	0	0	0	0	0	0	0	0	0	Human Diseases; Cardiovascular Diseases; Hypertrophic cardiomyopathy (HCM)
Indole alkaloid biosynthesis	4	4	2	1	0	1	1	0	2	Metabolism; Biosynthesis of Other Secondary Metabolites; Indole alkaloid biosynthesis
Influenza A	60	68	17	151	76	122	39	19	98	Human Diseases; Infectious Diseases; Influenza A
Inorganic ion transport and metabolism	31892	36184	28448	38444	32446	30897	39060	31719	34612	Unclassified; Cellular Processes and Signaling; Inorganic ion transport and metabolism
Inositol phosphate metabolism	17263	18543	16501	21216	20235	18653	19899	20101	19000	Metabolism; Carbohydrate Metabolism; Inositol phosphate metabolism
Insulin signaling pathway	14212	20538	16823	22769	14979	17804	16067	14668	12375	Organismal Systems; Endocrine System; Insulin signaling pathway
Ion channels	1914	1003	2116	1070	2673	2490	1665	3156	1728	Environmental Information Processing; Signaling Molecules and Interaction; Ion channels
Isoflavonoid biosynthesis	6	12	8	5	6	23	16	6	9	Metabolism; Biosynthesis of Other Secondary Metabolites; Isoflavonoid biosynthesis
Isoquinoline alkaloid biosynthesis	13115	13701	13106	13987	10331	11596	12949	9889	12930	Metabolism; Biosynthesis of Other Secondary Metabolites; Isoquinoline alkaloid biosynthesis
Leishmaniasis	0	0	0	0	0	0	0	0	0	Human Diseases; Infectious Diseases; Leishmaniasis
Leukocyte transendothelial migration	0	0	0	0	0	0	0	0	0	Organismal Systems; Immune System; Leukocyte transendothelial migration
Limonene and pinene degradation	21477	24258	20324	27301	20399	19920	23257	18767	22817	Metabolism; Metabolism of Terpenoids and Polyketides; Limonene and pinene degradation
Linoleic acid metabolism	13521	15438	16034	17638	14133	15860	15744	14389	12563	Metabolism; Lipid Metabolism; Linoleic acid metabolism
Lipid biosynthesis proteins	128756	158594	135605	162273	124859	134369	137155	122343	128517	Metabolism; Lipid Metabolism; Lipid biosynthesis proteins
Lipid metabolism	26517	35802	31277	36648	22511	29187	26100	23646	22326	Unclassified; Metabolism; Lipid metabolism
Lipoic acid metabolism	8281	7061	5090	6253	12043	7682	12153	11498	12199	Metabolism; Metabolism of Cofactors and Vitamins; Lipoic acid metabolism
Lipopolysaccharide biosynthesis	81820	60809	58055	65569	90944	70151	83205	85783	108496	Metabolism; Glycan Biosynthesis and Metabolism; Lipopolysaccharide biosynthesis
Lipopolysaccharide biosynthesis proteins	100752	80507	76652	86258	113317	90875	105034	108077	127968	Metabolism; Glycan Biosynthesis and Metabolism; Lipopolysaccharide biosynthesis proteins
Long-term depression	0	0	0	0	0	0	0	0	0	Organismal Systems; Nervous System; Long-term depression
Long-term potentiation	0	0	0	0	0	0	0	0	0	Organismal Systems; Nervous System; Long-term potentiation
Lysine biosynthesis	173555	211077	183499	215192	175923	185421	201985	172116	170810	Metabolism; Amino Acid Metabolism; Lysine biosynthesis
Lysine degradation	24556	26677	25985	28460	26218	27385	26316	26043	26039	Metabolism; Amino Acid Metabolism; Lysine degradation
Lysosome	23405	25228	13457	28255	31966	16168	38821	24866	34849	Cellular Processes; Transport and Catabolism; Lysosome
MAPK signaling pathway	0	0	0	0	0	0	0	0	0	Environmental Information Processing; Signal Transduction; MAPK signaling pathway
MAPK signaling pathway - yeast	11187	11924	9649	12315	12349	10267	14936	11021	13317	Environmental Information Processing; Signal Transduction; MAPK signaling pathway - yeast
Measles	0	4	2	8	4	14	13	8	18	Human Diseases; Infectious Diseases; Measles
Meiosis - yeast	430	911	543	946	823	1400	608	334	997	Cellular Processes; Cell Growth and Death; Meiosis - yeast
Melanogenesis	0	0	0	0	0	0	0	0	0	Organismal Systems; Endocrine System; Melanogenesis
Membrane and intracellular structural molecules	147776	138190	121681	145460	150156	129848	157652	139229	174239	Unclassified; Cellular Processes and Signaling; Membrane and intracellular structural molecules
Metabolism of cofactors and vitamins	21080	23415	23646	21529	18693	20844	19145	19896	19382	Unclassified; Metabolism; Metabolism of cofactors and vitamins
Metabolism of xenobiotics by cytochrome P450	3584	4012	3467	4772	4110	4613	2718	5065	4150	Metabolism; Xenobiotics Biodegradation and Metabolism; Metabolism of xenobiotics by cytochrome P450
Methane metabolism	241319	316677	262201	324919	246072	262907	297983	239971	230263	Metabolism; Energy Metabolism; Methane metabolism
Mineral absorption	661	1044	770	651	475	857	540	626	294	Organismal Systems; Digestive System; Mineral absorption
Mismatch repair	185253	221882	197538	227454	186015	197663	210033	181966	182570	Genetic Information Processing; Replication and Repair; Mismatch repair
N-Glycan biosynthesis	5847	7491	4780	6784	5311	3908	6724	4202	7801	Metabolism; Glycan Biosynthesis and Metabolism; N-Glycan biosynthesis
NOD-like receptor signaling pathway	9862	11783	10242	12263	9891	10636	11239	9587	10108	Organismal Systems; Immune System; NOD-like receptor signaling pathway
Naphthalene degradation	30732	39491	31383	40399	24363	26115	28611	23797	26973	Metabolism; Xenobiotics Biodegradation and Metabolism; Naphthalene degradation
Neuroactive ligand-receptor interaction	0	0	0	0	0	0	0	0	0	Environmental Information Processing; Signaling Molecules and Interaction; Neuroactive ligand-receptor interaction
Neurotrophin signaling pathway	0	0	0	0	0	0	0	0	0	Organismal Systems; Nervous System; Neurotrophin signaling pathway
Nicotinate and nicotinamide metabolism	100531	117769	100486	118970	96961	101088	110757	94335	104094	Metabolism; Metabolism of Cofactors and Vitamins; Nicotinate and nicotinamide metabolism
Nitrogen metabolism	136256	170910	144838	174075	126914	140324	158152	122417	131408	Metabolism; Energy Metabolism; Nitrogen metabolism
Nitrotoluene degradation	12215	18206	14760	18468	9883	13961	11302	12213	6526	Metabolism; Xenobiotics Biodegradation and Metabolism; Nitrotoluene degradation
Non-homologous end-joining	864	2280	1349	1147	729	1284	688	1619	913	Genetic Information Processing; Replication and Repair; Non-homologous end-joining
Notch signaling pathway	0	0	0	0	0	0	0	0	0	Environmental Information Processing; Signal Transduction; Notch signaling pathway
Novobiocin biosynthesis	30667	35807	31794	35558	29407	31102	35114	28678	30604	Metabolism; Biosynthesis of Other Secondary Metabolites; Novobiocin biosynthesis
Nucleotide excision repair	83089	104293	89155	105438	81453	88899	96463	78600	82691	Genetic Information Processing; Replication and Repair; Nucleotide excision repair
Nucleotide metabolism	8375	10227	9152	8018	9087	8912	11725	9164	7854	Unclassified; Metabolism; Nucleotide metabolism
Olfactory transduction	0	0	0	0	0	0	0	0	0	Organismal Systems; Sensory System; Olfactory transduction
One carbon pool by folate	151523	177959	149786	183295	144867	147806	167583	135604	155827	Metabolism; Metabolism of Cofactors and Vitamins; One carbon pool by folate
Oocyte meiosis	0	0	0	0	0	0	0	0	0	Cellular Processes; Cell Growth and Death; Oocyte meiosis
Other glycan degradation	61809	69895	47628	79697	69794	48598	89134	57157	79869	Metabolism; Glycan Biosynthesis and Metabolism; Other glycan degradation
Other ion-coupled transporters	235537	257436	243803	274555	230401	254685	265438	231573	228565	Unclassified; Cellular Processes and Signaling; Other ion-coupled transporters
Other transporters	51169	61056	58490	62042	49469	57384	55366	52113	45574	Unclassified; Cellular Processes and Signaling; Other transporters
Other types of O-glycan biosynthesis	0	0	0	0	0	0	0	0	0	Metabolism; Glycan Biosynthesis and Metabolism; Other types of O-glycan biosynthesis
Others	159456	202940	179303	222443	145772	170041	178446	144740	137978	Unclassified; Metabolism; Others
Oxidative phosphorylation	261354	285282	249381	295693	278371	264171	308181	263075	292370	Metabolism; Energy Metabolism; Oxidative phosphorylation
PPAR signaling pathway	23660	29694	23931	29132	22188	23751	23154	21320	25375	Organismal Systems; Endocrine System; PPAR signaling pathway
Pancreatic cancer	0	0	0	0	0	0	0	0	0	Human Diseases; Cancers; Pancreatic cancer
Pancreatic secretion	0	0	0	0	0	0	0	0	0	Organismal Systems; Digestive System; Pancreatic secretion
Pantothenate and CoA biosynthesis	138493	166698	145019	169031	133400	141642	159673	128021	142524	Metabolism; Metabolism of Cofactors and Vitamins; Pantothenate and CoA biosynthesis
Parkinson's disease	323	353	129	608	352	483	203	176	365	Human Diseases; Neurodegenerative Diseases; Parkinson's disease
Pathogenic Escherichia coli infection	15	5	0	10	5	5	0	10	5	Human Diseases; Infectious Diseases; Pathogenic Escherichia coli infection
Pathways in cancer	12162	13522	12013	15082	13054	13537	12991	12618	12662	Human Diseases; Cancers; Pathways in cancer
Penicillin and cephalosporin biosynthesis	4130	3469	2650	2452	6061	3755	6241	5795	5812	Metabolism; Biosynthesis of Other Secondary Metabolites; Penicillin and cephalosporin biosynthesis
Pentose and glucuronate interconversions	109557	128489	120714	140985	98110	108713	107246	94623	104693	Metabolism; Carbohydrate Metabolism; Pentose and glucuronate interconversions
Pentose phosphate pathway	156639	193230	180990	199067	160058	184895	182714	166795	145782	Metabolism; Carbohydrate Metabolism; Pentose phosphate pathway
Peptidases	401222	480351	412941	503903	390989	410570	455626	378084	393210	Metabolism; Enzyme Families; Peptidases
Peptidoglycan biosynthesis	183808	221106	194645	227228	176622	191944	196833	175978	177882	Metabolism; Glycan Biosynthesis and Metabolism; Peptidoglycan biosynthesis
Peroxisome	40637	45454	37792	46071	41602	36159	47224	36406	47191	Cellular Processes; Transport and Catabolism; Peroxisome
Pertussis	9626	4650	7115	5280	12313	9397	9584	13016	11448	Human Diseases; Infectious Diseases; Pertussis
Phagosome	0	4	2	8	4	14	13	8	18	Cellular Processes; Transport and Catabolism; Phagosome
Phenylalanine metabolism	37849	47326	39011	49226	32426	36772	38074	30947	36774	Metabolism; Amino Acid Metabolism; Phenylalanine metabolism
Phenylalanine, tyrosine and tryptophan biosynthesis	192021	232110	197009	241146	187560	198322	221052	183755	194657	Metabolism; Amino Acid Metabolism; Phenylalanine, tyrosine and tryptophan biosynthesis
Phenylpropanoid biosynthesis	37673	46640	37558	51407	30254	32541	38636	26200	39781	Metabolism; Biosynthesis of Other Secondary Metabolites; Phenylpropanoid biosynthesis
Phosphatidylinositol signaling system	16648	17822	15845	18029	19138	18887	21438	19563	18423	Environmental Information Processing; Signal Transduction; Phosphatidylinositol signaling system
Phosphonate and phosphinate metabolism	10481	13356	13215	12459	13169	13550	13071	14017	8860	Metabolism; Metabolism of Other Amino Acids; Phosphonate and phosphinate metabolism
Phosphotransferase system (PTS)	59542	60708	61603	74396	55058	78152	81131	62645	34676	Environmental Information Processing; Membrane Transport; Phosphotransferase system (PTS)
Photosynthesis	78747	90084	82866	98087	79038	79560	90245	73347	82929	Metabolism; Energy Metabolism; Photosynthesis
Photosynthesis - antenna proteins	0	0	0	0	0	0	0	0	0	Metabolism; Energy Metabolism; Photosynthesis - antenna proteins
Photosynthesis proteins	79073	90458	83126	99202	79313	79913	90401	73548	83677	Metabolism; Energy Metabolism; Photosynthesis proteins
Phototransduction	0	0	0	0	0	0	0	0	0	Organismal Systems; Sensory System; Phototransduction
Phototransduction - fly	0	0	0	0	0	0	0	0	0	Organismal Systems; Sensory System; Phototransduction - fly
Plant-pathogen interaction	30300	38763	35681	40146	29402	35829	34781	30222	27942	Organismal Systems; Environmental Adaptation; Plant-pathogen interaction
Polycyclic aromatic hydrocarbon degradation	17777	24625	19651	24670	16328	17677	21065	14666	18207	Metabolism; Xenobiotics Biodegradation and Metabolism; Polycyclic aromatic hydrocarbon degradation
Polyketide sugar unit biosynthesis	40827	50969	41427	52227	42368	39840	51932	38591	45379	Metabolism; Metabolism of Terpenoids and Polyketides; Polyketide sugar unit biosynthesis
Pores ion channels	77517	73184	66614	74948	84340	75095	87371	81492	92005	Unclassified; Cellular Processes and Signaling; Pores ion channels
Porphyrin and chlorophyll metabolism	148501	178852	177393	202242	127255	172235	161445	139560	128204	Metabolism; Metabolism of Cofactors and Vitamins; Porphyrin and chlorophyll metabolism
Prenyltransferases	74940	84345	71732	85600	73275	73436	82727	69455	81522	Metabolism; Metabolism of Terpenoids and Polyketides; Prenyltransferases
Primary bile acid biosynthesis	3453	4781	3546	4872	5004	4565	7537	4873	4339	Metabolism; Lipid Metabolism; Primary bile acid biosynthesis
Primary immunodeficiency	8704	8614	7377	10764	9215	8957	10579	8125	8893	Human Diseases; Immune System Diseases; Primary immunodeficiency
Prion diseases	342	517	274	954	326	289	190	347	131	Human Diseases; Neurodegenerative Diseases; Prion diseases
Progesterone-mediated oocyte maturation	9802	11675	10165	12192	9858	10425	11219	9521	10076	Organismal Systems; Endocrine System; Progesterone-mediated oocyte maturation
Propanoate metabolism	97673	120230	108988	124939	98146	110392	108936	100575	91396	Metabolism; Carbohydrate Metabolism; Propanoate metabolism
Prostate cancer	9813	11688	10177	12205	9860	10460	11225	9533	10078	Human Diseases; Cancers; Prostate cancer
Proteasome	9818	11816	10221	12222	9900	10492	11279	9558	10153	Genetic Information Processing; Folding, Sorting and Degradation; Proteasome
Protein digestion and absorption	7002	6724	4758	7590	5005	4146	6088	3657	8713	Organismal Systems; Digestive System; Protein digestion and absorption
Protein export	135385	162468	136119	167339	138658	142749	156556	133147	140044	Genetic Information Processing; Folding, Sorting and Degradation; Protein export
Protein folding and associated processing	123420	144967	124744	151359	123500	127996	137963	118520	130627	Unclassified; Genetic Information Processing; Protein folding and associated processing
Protein kinases	41655	58852	51777	62446	39612	47428	47954	41704	35154	Metabolism; Enzyme Families; Protein kinases
Protein processing in endoplasmic reticulum	15712	19949	14896	18629	15445	15420	17891	14360	18456	Genetic Information Processing; Folding, Sorting and Degradation; Protein processing in endoplasmic reticulum
Proximal tubule bicarbonate reclamation	3883	5368	4065	4766	5125	3356	5591	4252	4182	Organismal Systems; Excretory System; Proximal tubule bicarbonate reclamation
Purine metabolism	465949	550631	483649	560310	462520	486837	525442	454989	469786	Metabolism; Nucleotide Metabolism; Purine metabolism
Pyrimidine metabolism	402429	486733	421767	499586	395146	411844	458270	378861	404722	Metabolism; Nucleotide Metabolism; Pyrimidine metabolism
Pyruvate metabolism	204366	253389	224432	262716	205116	224624	237906	206618	193570	Metabolism; Carbohydrate Metabolism; Pyruvate metabolism
RIG-I-like receptor signaling pathway	37	62	78	51	111	61	68	87	32	Organismal Systems; Immune System; RIG-I-like receptor signaling pathway
RNA degradation	105608	119297	107463	122463	109352	109683	119730	106027	110771	Genetic Information Processing; Folding, Sorting and Degradation; RNA degradation
RNA polymerase	35020	42813	37699	43424	34728	37993	40463	34804	34365	Genetic Information Processing; Transcription; RNA polymerase
RNA transport	26972	32728	29997	32199	30156	32922	34243	32333	24646	Genetic Information Processing; Translation; RNA transport
Regulation of actin cytoskeleton	0	0	0	0	0	0	0	0	0	Cellular Processes; Cell Motility; Regulation of actin cytoskeleton
Renal cell carcinoma	2300	1783	1833	2747	3124	3004	1746	3086	2506	Human Diseases; Cancers; Renal cell carcinoma
Renin-angiotensin system	19	34	10	15	7	3	1	2	19	Organismal Systems; Endocrine System; Renin-angiotensin system
Replication, recombination and repair proteins	145751	181023	173537	172974	143934	163957	156217	152136	128556	Unclassified; Genetic Information Processing; Replication, recombination and repair proteins
Restriction enzyme	39854	53961	40847	48739	38538	39867	43840	37043	39185	Unclassified; Genetic Information Processing; Restriction enzyme
Retinol metabolism	4469	5826	4223	6948	2504	3727	2249	2956	3972	Metabolism; Metabolism of Cofactors and Vitamins; Retinol metabolism
Rheumatoid arthritis	0	0	0	0	0	0	0	0	0	Human Diseases; Immune System Diseases; Rheumatoid arthritis
Riboflavin metabolism	55680	56092	54588	54454	55782	56009	59387	56918	58618	Metabolism; Metabolism of Cofactors and Vitamins; Riboflavin metabolism
Ribosome	533391	640820	551566	645676	531279	555987	612556	512375	545950	Genetic Information Processing; Translation; Ribosome
Ribosome Biogenesis	310788	361299	328225	369441	323017	341451	357142	323079	307862	Genetic Information Processing; Translation; Ribosome Biogenesis
Ribosome biogenesis in eukaryotes	11611	12631	11727	12863	12256	12597	12993	12347	11718	Genetic Information Processing; Translation; Ribosome biogenesis in eukaryotes
Salivary secretion	0	0	0	0	0	0	0	0	0	Organismal Systems; Digestive System; Salivary secretion
Secondary bile acid biosynthesis	3447	4772	3541	4867	4999	4562	7531	4868	4335	Metabolism; Lipid Metabolism; Secondary bile acid biosynthesis
Secretion system	249045	293968	278452	289123	255182	274095	262278	269775	234826	Environmental Information Processing; Membrane Transport; Secretion system
Selenocompound metabolism	67927	83938	70868	85836	64567	72093	77664	64433	65037	Metabolism; Metabolism of Other Amino Acids; Selenocompound metabolism
Sesquiterpenoid biosynthesis	0	0	0	0	0	0	0	0	0	Metabolism; Metabolism of Terpenoids and Polyketides; Sesquiterpenoid biosynthesis
Shigellosis	6	2	0	4	2	2	0	4	2	Human Diseases; Infectious Diseases; Shigellosis
Signal transduction mechanisms	89498	109705	103435	114907	88326	102577	98068	92263	77081	Unclassified; Cellular Processes and Signaling; Signal transduction mechanisms
Small cell lung cancer	60	64	15	143	72	108	26	11	80	Human Diseases; Cancers; Small cell lung cancer
Sphingolipid metabolism	40364	48418	37429	54923	42928	35079	53768	36590	47957	Metabolism; Lipid Metabolism; Sphingolipid metabolism
Spliceosome	0	0	0	0	0	0	0	0	0	Genetic Information Processing; Transcription; Spliceosome
Sporulation	110029	197640	171134	195078	87050	150979	136482	111064	49759	Unclassified; Cellular Processes and Signaling; Sporulation
Staphylococcus aureus infection	1643	1892	810	1682	1175	1046	1833	1059	513	Human Diseases; Infectious Diseases; Staphylococcus aureus infection
Starch and sucrose metabolism	199244	254605	221187	267651	181899	202138	215100	177511	187030	Metabolism; Carbohydrate Metabolism; Starch and sucrose metabolism
Steroid biosynthesis	8	12	8	5	7	23	18	6	9	Metabolism; Lipid Metabolism; Steroid biosynthesis
Steroid hormone biosynthesis	310	369	260	1080	341	633	165	338	779	Metabolism; Lipid Metabolism; Steroid hormone biosynthesis
Stilbenoid, diarylheptanoid and gingerol biosynthesis	131	139	44	227	112	179	65	73	661	Metabolism; Biosynthesis of Other Secondary Metabolites; Stilbenoid, diarylheptanoid and gingerol biosynthesis
Streptomycin biosynthesis	66396	82058	67052	83637	67357	64216	79257	63221	72943	Metabolism; Biosynthesis of Other Secondary Metabolites; Streptomycin biosynthesis
Styrene degradation	1756	2279	2636	2232	1119	1765	1336	1192	743	Metabolism; Xenobiotics Biodegradation and Metabolism; Styrene degradation
Sulfur metabolism	46022	57142	48820	60361	41857	48585	51706	40881	45517	Metabolism; Energy Metabolism; Sulfur metabolism
Sulfur relay system	45660	49907	54387	49652	50936	59056	54530	56637	42544	Genetic Information Processing; Folding, Sorting and Degradation; Sulfur relay system
Synthesis and degradation of ketone bodies	4591	5849	6396	6105	3118	5763	5270	3156	3149	Metabolism; Lipid Metabolism; Synthesis and degradation of ketone bodies
Systemic lupus erythematosus	0	0	0	0	0	0	0	0	0	Human Diseases; Immune System Diseases; Systemic lupus erythematosus
TGF-beta signaling pathway	0	0	0	0	0	0	0	0	0	Environmental Information Processing; Signal Transduction; TGF-beta signaling pathway
Taurine and hypotaurine metabolism	24548	28111	22963	28153	23881	23384	28446	21997	26981	Metabolism; Metabolism of Other Amino Acids; Taurine and hypotaurine metabolism
Terpenoid backbone biosynthesis	125854	153138	131361	155009	121423	131964	142038	116601	126489	Metabolism; Metabolism of Terpenoids and Polyketides; Terpenoid backbone biosynthesis
Tetracycline biosynthesis	24850	29420	31921	30374	28267	33385	28462	30417	20294	Metabolism; Metabolism of Terpenoids and Polyketides; Tetracycline biosynthesis
Thiamine metabolism	102393	124102	109609	122016	106692	110686	124530	107468	100000	Metabolism; Metabolism of Cofactors and Vitamins; Thiamine metabolism
Tight junction	0	0	0	0	0	0	0	0	0	Cellular Processes; Cell Communication; Tight junction
Toluene degradation	22420	19916	17354	20276	24089	19631	22750	21935	28171	Metabolism; Xenobiotics Biodegradation and Metabolism; Toluene degradation
Toxoplasmosis	60	64	15	143	72	108	26	11	80	Human Diseases; Infectious Diseases; Toxoplasmosis
Transcription factors	271316	365885	349774	384878	247360	330688	302002	272004	197053	Genetic Information Processing; Transcription; Transcription factors
Transcription machinery	214529	268482	237638	282145	197701	219840	226120	194096	198532	Genetic Information Processing; Transcription; Transcription machinery
Transcription related proteins	595	673	611	713	423	494	556	405	313	Unclassified; Genetic Information Processing; Transcription related proteins
Translation factors	120657	144788	123479	146153	121331	125387	141245	116513	125672	Genetic Information Processing; Translation; Translation factors
Translation proteins	202063	238255	215182	240391	205669	218468	228338	205910	198898	Unclassified; Genetic Information Processing; Translation proteins
Transporters	1018183	1374736	1281080	1513796	1012951	1289818	1191072	1054159	795560	Environmental Information Processing; Membrane Transport; Transporters
Tropane, piperidine and pyridine alkaloid biosynthesis	25848	30647	27771	30622	22815	25382	26049	22025	24146	Metabolism; Biosynthesis of Other Secondary Metabolites; Tropane, piperidine and pyridine alkaloid biosynthesis
Tryptophan metabolism	27273	28553	25042	30769	32071	29570	36985	30183	32531	Metabolism; Amino Acid Metabolism; Tryptophan metabolism
Tuberculosis	31498	38680	33924	39965	31137	33336	35138	30085	31552	Human Diseases; Infectious Diseases; Tuberculosis
Two-component system	244096	314779	303379	318008	235930	273771	256718	248105	210215	Environmental Information Processing; Signal Transduction; Two-component system
Type I diabetes mellitus	11976	14253	11095	13774	13387	11614	15801	12232	13672	Human Diseases; Metabolic Diseases; Type I diabetes mellitus
Type II diabetes mellitus	10370	13230	11160	12705	10415	11311	11850	10475	10458	Human Diseases; Metabolic Diseases; Type II diabetes mellitus
Tyrosine metabolism	64842	82125	69767	82601	57498	63360	68515	56245	59648	Metabolism; Amino Acid Metabolism; Tyrosine metabolism
Ubiquinone and other terpenoid-quinone biosynthesis	59023	44268	44738	49366	63686	51808	59320	61904	74332	Metabolism; Metabolism of Cofactors and Vitamins; Ubiquinone and other terpenoid-quinone biosynthesis
Ubiquitin system	153	172	63	271	170	320	99	141	685	Genetic Information Processing; Folding, Sorting and Degradation; Ubiquitin system
VEGF signaling pathway	0	0	0	0	0	0	0	0	0	Environmental Information Processing; Signal Transduction; VEGF signaling pathway
Valine, leucine and isoleucine biosynthesis	154834	188171	167560	192532	158784	171093	180573	156719	155813	Metabolism; Amino Acid Metabolism; Valine, leucine and isoleucine biosynthesis
Valine, leucine and isoleucine degradation	44708	46733	42703	50741	44249	44288	51163	41573	51474	Metabolism; Amino Acid Metabolism; Valine, leucine and isoleucine degradation
Various types of N-glycan biosynthesis	45	144	77	33	51	56	65	56	52	Metabolism; Glycan Biosynthesis and Metabolism; Various types of N-glycan biosynthesis
Vascular smooth muscle contraction	0	0	0	0	0	0	0	0	0	Organismal Systems; Circulatory System; Vascular smooth muscle contraction
Vasopressin-regulated water reabsorption	0	0	0	0	0	0	0	0	0	Organismal Systems; Excretory System; Vasopressin-regulated water reabsorption
Vibrio cholerae infection	0	4	2	8	4	14	13	8	18	Human Diseases; Infectious Diseases; Vibrio cholerae infection
Vibrio cholerae pathogenic cycle	20303	17812	21753	19590	20735	21504	18527	22017	20280	Human Diseases; Infectious Diseases; Vibrio cholerae pathogenic cycle
Viral myocarditis	60	64	15	143	72	108	26	11	80	Human Diseases; Cardiovascular Diseases; Viral myocarditis
Vitamin B6 metabolism	49349	54474	48911	54386	49724	48768	52171	49159	52730	Metabolism; Metabolism of Cofactors and Vitamins; Vitamin B6 metabolism
Wnt signaling pathway	0	0	0	0	0	0	0	0	0	Environmental Information Processing; Signal Transduction; Wnt signaling pathway
Xylene degradation	8001	12738	10439	11072	7886	10241	8730	9536	4434	Metabolism; Xenobiotics Biodegradation and Metabolism; Xylene degradation
Zeatin biosynthesis	12614	14753	12487	15627	11024	12502	12451	10322	12872	Metabolism; Metabolism of Terpenoids and Polyketides; Zeatin biosynthesis
alpha-Linolenic acid metabolism	1576	432	1283	535	2202	2028	1218	2659	2062	Metabolism; Lipid Metabolism; alpha-Linolenic acid metabolism
beta-Alanine metabolism	40355	44415	35528	47168	41546	39499	53177	37679	47141	Metabolism; Metabolism of Other Amino Acids; beta-Alanine metabolism
beta-Lactam resistance	4063	3060	2413	2569	6280	3740	6258	5780	5781	Metabolism; Biosynthesis of Other Secondary Metabolites; beta-Lactam resistance
mRNA surveillance pathway	0	8	4	16	8	28	26	16	36	Genetic Information Processing; Translation; mRNA surveillance pathway
mTOR signaling pathway	0	4	2	8	4	14	13	8	18	Environmental Information Processing; Signal Transduction; mTOR signaling pathway
p53 signaling pathway	60	64	15	143	72	108	26	11	80	Cellular Processes; Cell Growth and Death; p53 signaling pathway
